# Supplementary material
Source: Research Square preprint supplement (doi:10.21203/rs.3.rs-9418446/v1)
Supplement: Supplementary file 1 [file a4e060774e7c1e6ca0bd8521.pdf]

# Supplementary Information

## Mitigating Future Respiratory Pandemics in Low-, Middle- and High-Income Countries: A Modelling Study of Health, Economic and Educational Losses

Patrick Doohan<sup>1,\*</sup>, Rob Johnson<sup>1</sup>, Alessandra Løchen<sup>1</sup>, Christian Morgenstern<sup>1</sup>, David Haw<sup>2</sup>, Alice Sabino<sup>3</sup>, Edith Patouillard<sup>4</sup>, Giovanni Forchini<sup>1,5</sup>, and Katharina D. Hauck<sup>1</sup>

<sup>1</sup>MRC Centre for Global Infectious Disease Analysis, Jameel Institute, School of Public Health, Imperial College London, UK

<sup>2</sup>Department of Mathematical Sciences/Institute of Veterinary, Infection and Ecological Sciences, University of Liverpool

<sup>3</sup>Coalition for Epidemic Preparedness Innovations (CEPI), London, UK

<sup>4</sup>Department of Health Financing and Economics, World Health Organization, Geneva, Switzerland

<sup>5</sup>UBSE, Umeå Universitet, Umeå, Sweden

\*Correspondence: patrick.doohan15@imperial.ac.uk

### Contents

|          |                                           |           |
|----------|-------------------------------------------|-----------|
| <b>1</b> | <b>Background &amp; Literature Review</b> | <b>2</b>  |
| <b>2</b> | <b>Model &amp; Data</b>                   | <b>2</b>  |
| 2.1      | Income-Group Archetypes . . . . .         | 3         |
| 2.2      | Disease Epidemiology . . . . .            | 8         |
| 2.3      | Mitigation Measures . . . . .             | 12        |
| 2.4      | Closure Strategies . . . . .              | 26        |
| 2.5      | Socioeconomic Loss . . . . .              | 33        |
| <b>3</b> | <b>Additional Figures</b>                 | <b>38</b> |
| <b>4</b> | <b>Additional Tables</b>                  | <b>49</b> |
| <b>5</b> | <b>Code &amp; Future Work</b>             | <b>62</b> |

# 1 Background & Literature Review

The PubMed database was searched for studies that model the impacts of non-pharmaceutical interventions (NPIs) for mitigating hypothetical respiratory pandemics, using the search string model\* AND (“future pandemic\*” OR “pandemic influenza” OR “pandemic strain” OR “novel \* outbreak\*” OR “novel \* pathogen\*” OR “emerg\* pathogen\*”) AND (strateg\* OR mitigat\* OR contain\* OR intervention\*), without language restriction and from database inception to 14<sup>th</sup> March 2025. The search yielded 46 original research studies, published between 2005 and 2024, and two secondary research studies: a systematic review of modelling studies of school closures<sup>1</sup> and a systematic review of modelling studies of combinations of mitigation measures<sup>2</sup>. The original research studies identified are very limited in scope: typically, influenza pandemics in high-income Anglosphere countries are considered, mitigated by fixed-duration NPIs that do not respond to the epidemic state, and the impacts quantified in terms of health losses alone. Only three studies identified are applied to low- or middle-income countries<sup>3-5</sup>, only five studies consider diseases other than influenza<sup>6-10</sup> and only four quantify the economic losses of workplace closures in addition to the health impact<sup>11-14</sup>, albeit in a simplistic manner that does not consider the underlying structure of the economy. No study was identified that considered any two of these three dimensions simultaneously, and no study was identified that quantified the long-term learning losses associated with school closures. Therefore, the pandemic planning research conducted to date is very narrow in focus and in the aftermath of the Covid-19 pandemic, there is a need for the health and socioeconomic assessments of NPIs for potential future pandemics across all country-income groups.

This modelling study quantifies and projects the joint health, economic and educational losses under alternative business- and school-closure mitigation strategies, with underlying NPIs and vaccination, for different respiratory pandemics and country-income groups. The closure strategies mimic those implemented during the Covid-19 pandemic and are fully responsive to the epidemic state for each simulation, and the model is parametrised by Covid-19 mitigation data. Here, a fully-integrated epidemiological-economic model is employed to project the socioeconomic losses of a given strategy, which captures the interdependence of disease transmission and economic activity, thus capitalising on recent developments in the field of economic epidemiology. Socioeconomic-loss-minimising strategies are identified for different diseases and country-income groups, considering the variability in underlying demographic, economic, mixing, and mitigation parameters. A cost-benefit analysis of switching between different closure strategies is performed. The study is a major update to the pandemic preparedness literature for the post-Covid era and provides insights into mitigating potential future pandemics, co-produced with global health policy partners. Furthermore, the model serves as a robust tool for the evaluation of the return-on-investment of pandemic prevention and preparedness measures considering the socioeconomic losses of pandemics beyond just health losses.

## 2 Model & Data

The model underlying the current study is daedalus, an integrated epidemiological-economic model that was originally developed in response to the Covid-19 pandemic to optimise economic sector closures in the UK<sup>15</sup>, and subsequently employed to estimate the socioeconomic benefit of booster vaccinations in Indonesia<sup>16</sup> and deaths averted under various body-mass index distributions in Mexico<sup>17</sup>. The epidemiological component is a deterministic SEIR compartmental model with age and economic-sector heterogeneity, while the economic component is a deterministic partial-equilibrium aggregate production model with economic-sector heterogeneity. The component models are linked in a bi-directional manner, through economic-sector-dependent workplace transmission (impact of economy on epidemiology) and health-state-dependent labour supply (impact of epidemiology on economy). The mitigation measures considered include the full or partial differential closure of economic sectors (including education), home-working, distancing, case isolation, hospital capacity and vaccination, which may have combined health, economic and educational impacts. For example, economic sector closures reduce workplace transmission and health losses, but at the expense of reduced production and economic losses.

Here, the daedalus model is used to project the socioeconomic loss (see section 2.5) under various dynamic closure strategies (see section 2.4) imposed in conjunction with other mitigation measures (see section 2.3), for novel respiratory diseases (section 2.2) and country-income groups (section 2.1). The model is parametrised using income-group-specific demographic, economic and mixing data (see Figure S1), historic respiratory pandemic and pandemic-variant epidemiological data (see Table S1), and Covid-19 mitigation measure and closure data (see Figures S2 - S5 and Tables S3 - S2), which were assembled from numerous diverse sources and described in detail in the following sections. It must be emphasised that this is a projection study, not a model-fitting

54 exercise. The objective is not to reconstruct historic outbreaks, but rather to investigate and compare the  
55 potential outcomes of hypothetical pandemics with realistic historically-inspired epidemiology, as a pandemic  
56 planning exercise. The code and data are available on GitHub<sup>18</sup>.

## 57 2.1 Income-Group Archetypes

58 The analysis is stratified by country-income group, since there are fundamental differences in demography,  
59 mixing, economics and mitigation capability between low- and high-income countries, which will likely affect  
60 pandemic interventions and outcomes<sup>19–21</sup>. Three income-group ‘archetypes’ are considered, based on the World  
61 Bank classification<sup>22</sup>, except for the low- and lower-middle-income countries which are combined due to lack of  
62 country-level data. Hence, the income-group archetypes and abbreviations are:

- 63 • LLMIC: low- and lower-middle-income countries
- 64 • UMIC: upper-middle-income countries
- 65 • HIC: high-income countries.

66 While it is technically feasible to stratify by country, this level of spatial resolution is problematic. It implies  
67 a degree of confidence in the underlying country-level data that is not well-suited to a projection study of this  
68 nature. Moreover, pandemic interventions and outcomes are influenced by numerous factors beyond those that  
69 can be adequately captured by a model, further limiting the appropriateness of such stratification.

70 Within each income-group archetype, 5000 ‘synthetic countries’ are constructed by randomly sampling with  
71 replacement from the empirical distributions of the assembled country-level data for that income group, specif-  
72 ically the demographic, economic and mixing data. By generating a range of plausible synthetic countries,  
73 this approach accounts for uncertainty in the underlying data and allows for variability in model output. The  
74 generating process is described in more detail in subsequent paragraphs.

### 75 Demography

76 The total population of each synthetic country is fixed at 50 million, but the analysis is independent of population  
77 size given the deterministic nature of the model. The proportion of the total population in five-year age-bands  
78 is drawn from the empirical distribution for each country-income-group archetype (see Figure S1), obtained  
79 from the United Nations<sup>23</sup>, and the resulting population by five-year age-band is denoted  $\tilde{N}_a$ . Remaining  
80 life-expectancy by five-year age-band, denoted  $\tilde{l}_a$ , is also drawn, with data sourced from the World Health  
81 Organization (WHO)<sup>24</sup>.

82 However, the daedalus model employs a coarser disaggregation of the population into four age-groups:

- 83 • preschool-age: 0-4 years
- 84 • school-age: 5-19 years
- 85 • working-age: 20-64 years
- 86 • retired-age: 65+ years,

87 and so  $\tilde{N}_a$  is aggregated into  $\hat{N}_g$ , where the index  $g$  represents the model age-groups listed above.

### 88 Economy

The economy of each synthetic country is disaggregated into 45 economic sectors, based on the 4<sup>th</sup> revision of  
the International Standard Industrial Classification of All Economic Activities<sup>25</sup>, which are listed in Table S3.  
The workforce by sector is conditional on the working-age population: the proportion of the working-age group  
working in each economic sector and not working at all is drawn from the empirical distribution for each country-  
income-group archetype (see Figure S1), estimated by dividing workforce data obtained from the Organisation

for Economic Co-operation and Development (OECD)<sup>26</sup> and the International Labour Organization (ILO)<sup>27</sup> by the aforementioned working-age population data, and the resulting workforce by sector is denoted  $N_j$  for  $j \in \{1, \dots, 45\}$ . Values of  $j$  exceeding 45 represent the non-working model age-groups (preschool-age, school-age, *non-working* working-age, retired-age), and so  $N_j$  denotes the population by economic sector and non-working age-group in general (henceforth termed model strata), such that:

$$\sum_{j=1}^{49} N_j = \sum_{g=1}^4 \hat{N}_g = \sum_{a=1}^{21} \tilde{N}_a = 50,000,000.$$

89 It is assumed that the workforce by sector encompasses those in both the formal and informal sectors of the  
90 economy.

Annual gross value added (GVA) per worker by sector (a measure of worker productivity), denoted  $y_j$ , is also drawn from the empirical distribution estimated by dividing GVA data obtained from OECD input-output tables<sup>28</sup> by the aforementioned workforce data. Economic output is then measured in terms of Gross Domestic Product (GDP) in U.S. dollars (\$) using a production approach, with linear production function

$$Y_0 = \sum_1^{45} y_j N_j,$$

91 where  $Y_0$  is total annual pre-pandemic GDP. The economic model is stylised: neither sectoral interdependencies  
92 nor consumption are modelled, it is assumed that the goods/services market clears, and international trade is  
93 not modelled explicitly.

## 94 Mixing

Population mixing refers to the contact patterns between different population groups that facilitate disease transmission, a proportion of which are associated with economic activity. Contact patterns are encoded in contact matrices, which specify the mean number of contacts per day within and between each group in the population. Here, the total contact matrix of each synthetic country is denoted  $M$ , where element  $M_{j,j'}$  represents the contacts experienced by model stratum  $j$  (economic sector or non-working age-group) from model stratum  $j'$ . Following a similar approach to the original daedalus model<sup>15</sup>, the total contact matrix  $M$  is decomposed into community ( $A$ ), worker-to-worker ( $B$ ) and worker-to-consumer ( $C$ ) contact matrices, where contact matrices  $B$  and  $C$  encode sector-specific workplace mixing heterogeneity, based on data synthesised from a French contact survey from 2012<sup>29</sup> mapped to the 45 economic sectors considered here. The community contact matrix  $A$  is further decomposed into household ( $A^{(L)}$ ), other-location ( $A^{(H)}$ ) and school ( $A^{(S)}$ ) contact matrices, such that the total contact matrix at time  $t$  can be written as a sum across different locations:

$$M(t) = A^{(L)} + A^{(H)}(t) + A^{(S)}(t) + B(t) + C(t).$$

95 The time-dependence in this equation represents dynamic mitigation by economic sector closures (including  
96 education) and home-working, the specifics of which are described in detail below (see section 2.4). The extent  
97 to which sector  $j$  is open at time  $t$  is denoted  $x_j(t)$ , and the proportion of workers home-working denoted  $q_j(t)$ ,  
98 therefore the total contact matrix can also be written  $M(t) = M(x_j(t), q_j(t))$ . The manner in which these  
99 mitigation measures reduce contact rates in different locations (if at all) is detailed in the following paragraphs.

100 The household, other-location and school contact matrices are drawn respectively from empirical distributions  
101 of ‘home’, ‘other-location’ and ‘school’ synthetic contact matrices for each country-income-group archetype,  
102 collated from work by Prem and colleagues<sup>30,31</sup>, where the original 16-by-16 matrices for five-year age-bands are  
103 aggregated into four-by-four matrices for the model age-groups listed above. These are subsequently broadcasted  
104 to the 49 model strata, as described below. The worker-to-worker and consumer-to-worker contact matrices  
105 have fixed structure as specified in the original daedalus model, but these are rescaled such that the combined  
106 working-age-population-weighted-average workplace contact rate matches the value drawn from the empirical  
107 distribution calculated from the ‘work’ synthetic contact matrices (see Figure S1).

The household contact matrix  $A^{(L)}$  represents intra- and inter-household contacts. Let  $\hat{A}_{g,g'}^{(L)}$  denote the four-by-four matrix for model age-groups drawn from the empirical distribution of ‘home’ synthetic contact matrices. By broadcasting the four-by-four matrix in proportion to population by stratum, the household contact matrix

is defined as

$$A_{j,j'}^{(L)} = \hat{A}_{g(j),g'(j')}^{(L)} \frac{N_{j'}}{\hat{N}_{g'(j')}},$$

108 where  $N_{j'}$  is the population of stratum  $j'$  (economic sector or non-working age-group) and  $\hat{N}_{g'(j')}$  is the popu-  
 109 lation of the model age-group  $g'$  that stratum  $j'$  belongs to. Household contacts are independent of economic  
 110 sector closures and home-working (hence no  $t$ -dependence in the total contact matrix equation above).

The other-location contact matrix  $A^{(H)}$  represents contacts in locations other than households, schools and workplaces - such as outdoors, modes of transport, hospitality venues and retail outlets. Let  $\hat{A}_{g,g'}^{(H)}$  denote the four-by-four matrix for model age-groups drawn from the empirical distribution of ‘other-location’ synthetic contact matrices. As before, this four-by-four matrix is broadcasted to a 49-by-49 matrix in proportion to population by stratum. However, other-location contacts depend on the extent to which certain economic sectors are open - the hospitality sectors in particular. It is assumed that 45% of other-location contacts are made in hospitality venues, based on the proportion of ‘leisure’ contacts among ‘other-location’ contacts pooled across the countries of the POLYMOD study<sup>32</sup>. Therefore, the other-location contact matrix is defined as

$$A_{j,j'}^{(H)}(t) = \hat{A}_{g(j),g'(j')}^{(H)} \frac{N_{j'}}{\hat{N}_{g'(j')}} (0.55 + 0.45(x_{hosp}(t))^2),$$

111 where  $x_{hosp}(t) = \sum_j x_j(t)N_j / \sum_j N_j$  for  $j = 32, 43, 44$  (see Table 2.4) is the workforce-weighted-average extent  
 112 to which the hospitality sectors are open. The scaling is quadratic in  $x_{hosp}(t)$ . Other-location contacts are  
 113 independent of home-working.

The school contact matrix  $A^{(S)}$  represents contacts in schools. Let  $\hat{A}_{g,g'}^{(S)}$  denote the four-by-four matrix for model age-groups drawn from the empirical distribution of ‘school’ synthetic contact matrices. As before, this four-by-four matrix is broadcasted to a 49-by-49 matrix in proportion to population by stratum. School contacts depend on the extent to which the education sector is open, hence the school contact matrix is defined as

$$A_{j,j'}^{(S)}(t) = \hat{A}_{g(j),g'(j')}^{(S)} \frac{N_{j'}}{\hat{N}_{g'(j')}} (x_{edu}(t))^{\mathbb{1}_{\{g(j),g'(j') \leq 2\}}},$$

114 where  $x_{edu}(t) = x_{41}(t)$  (see Table 2.4) is the extent to which the education sector is open and  $\mathbb{1}$  is the indicator  
 115 function, i.e. only intra- and inter- preschool- and school-age contacts are reduced. The scaling is quadratic in  
 116  $x_{edu}(t)$ . School contacts are independent of home-working.

The workplace contact matrices  $B$  and  $C$  represent worker-to-worker and consumer-to-worker contacts in workplaces respectively. In the original daedalus model<sup>15</sup>,  $B$  is a diagonal matrix with diagonal elements  $b_j$  (pre-pandemic) and  $C$  is a square matrix with row-sums  $c_j$  (pre-pandemic) that are split column-wise in proportion to population by stratum, where  $b_j$  and  $c_j$  are the sector-specific values mapped from the French contact survey<sup>29</sup>. This implies that the combined working-age-population-weighted-average workplace contact rate is  $w^{old} = \sum_{j:g(j)=3} (b_j + c_j)N_j / N_{g(j)}$ , where  $b_j = c_j = 0$  for  $j > 45$ , i.e. workplace contacts for non-working age-groups are zero. Here, the structure of the workplace contact matrices is preserved from the original daedalus model but the magnitude of workplace contacts is allowed to vary. Let  $w^{new}$  denote the workplace contact rate drawn from the empirical distribution calculated from ‘work’ synthetic contact matrices. Given that workplace contacts must also depend on the extent to which economics sectors are open and the proportion of workers home-working, the workplace contact matrices are defined as

$$B_{j,j}(t) = b_j \frac{w^{new}}{w^{old}} (x_j(t)(1 - q_j(t)))^2$$

$$C_{j,j'}(t) = c_j \frac{N_{j'}}{\sum_{j'} N_{j'}} \frac{w^{new}}{w^{old}} x_j(t) (1 - q_j(t)),$$

117 where the scaling in  $B$  is quadratic in  $x_j(t)$  (worker-to-worker contacts) and  $q_j(t)$  but the scaling in  $C$  is linear  
 118 (consumer-to-worker contacts). The economic-sector heterogeneity of workplace transmission is encoded in  $b_j$   
 119 and  $c_j$ .

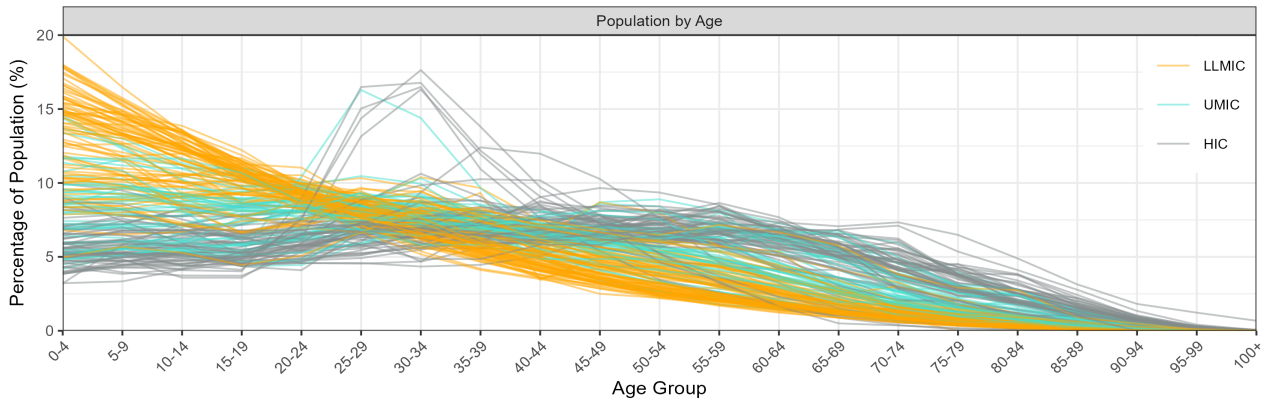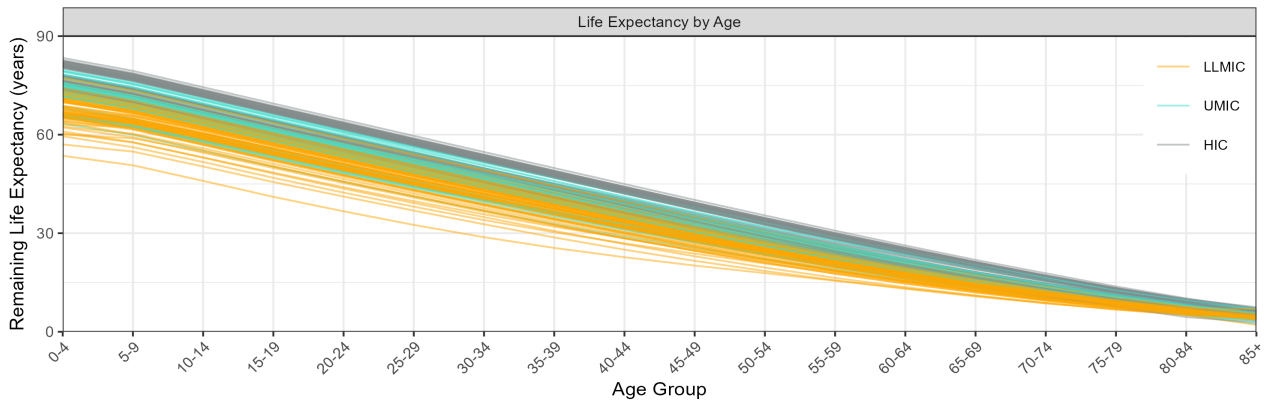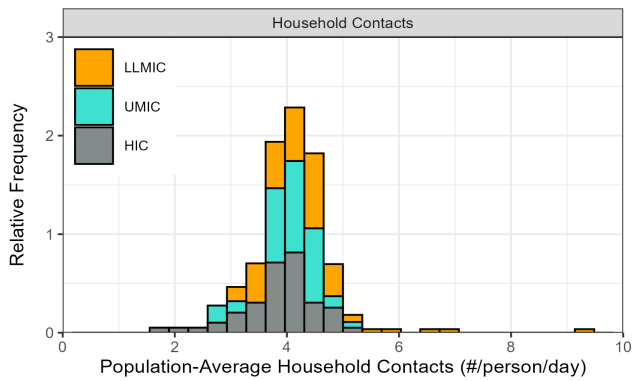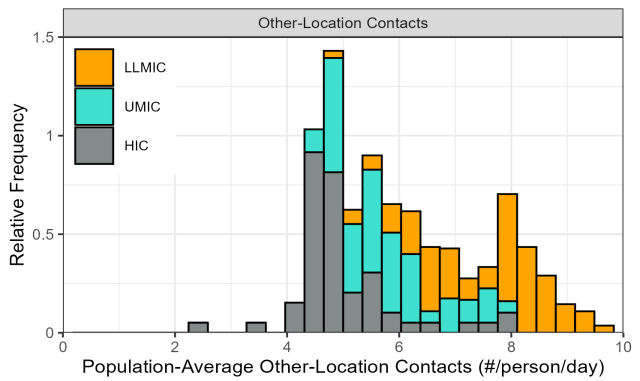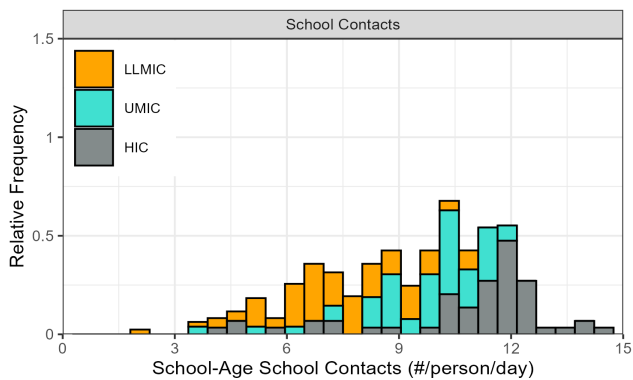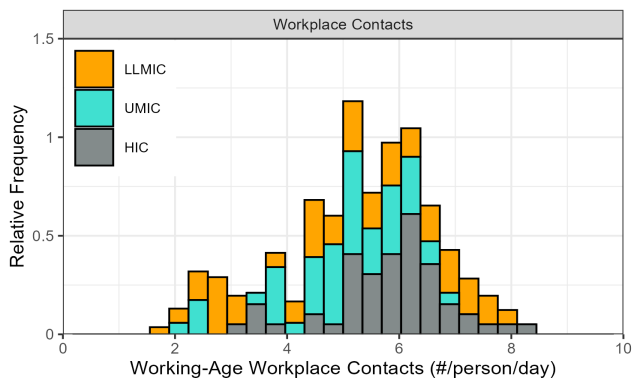

Figure S1: Continued on next page ...

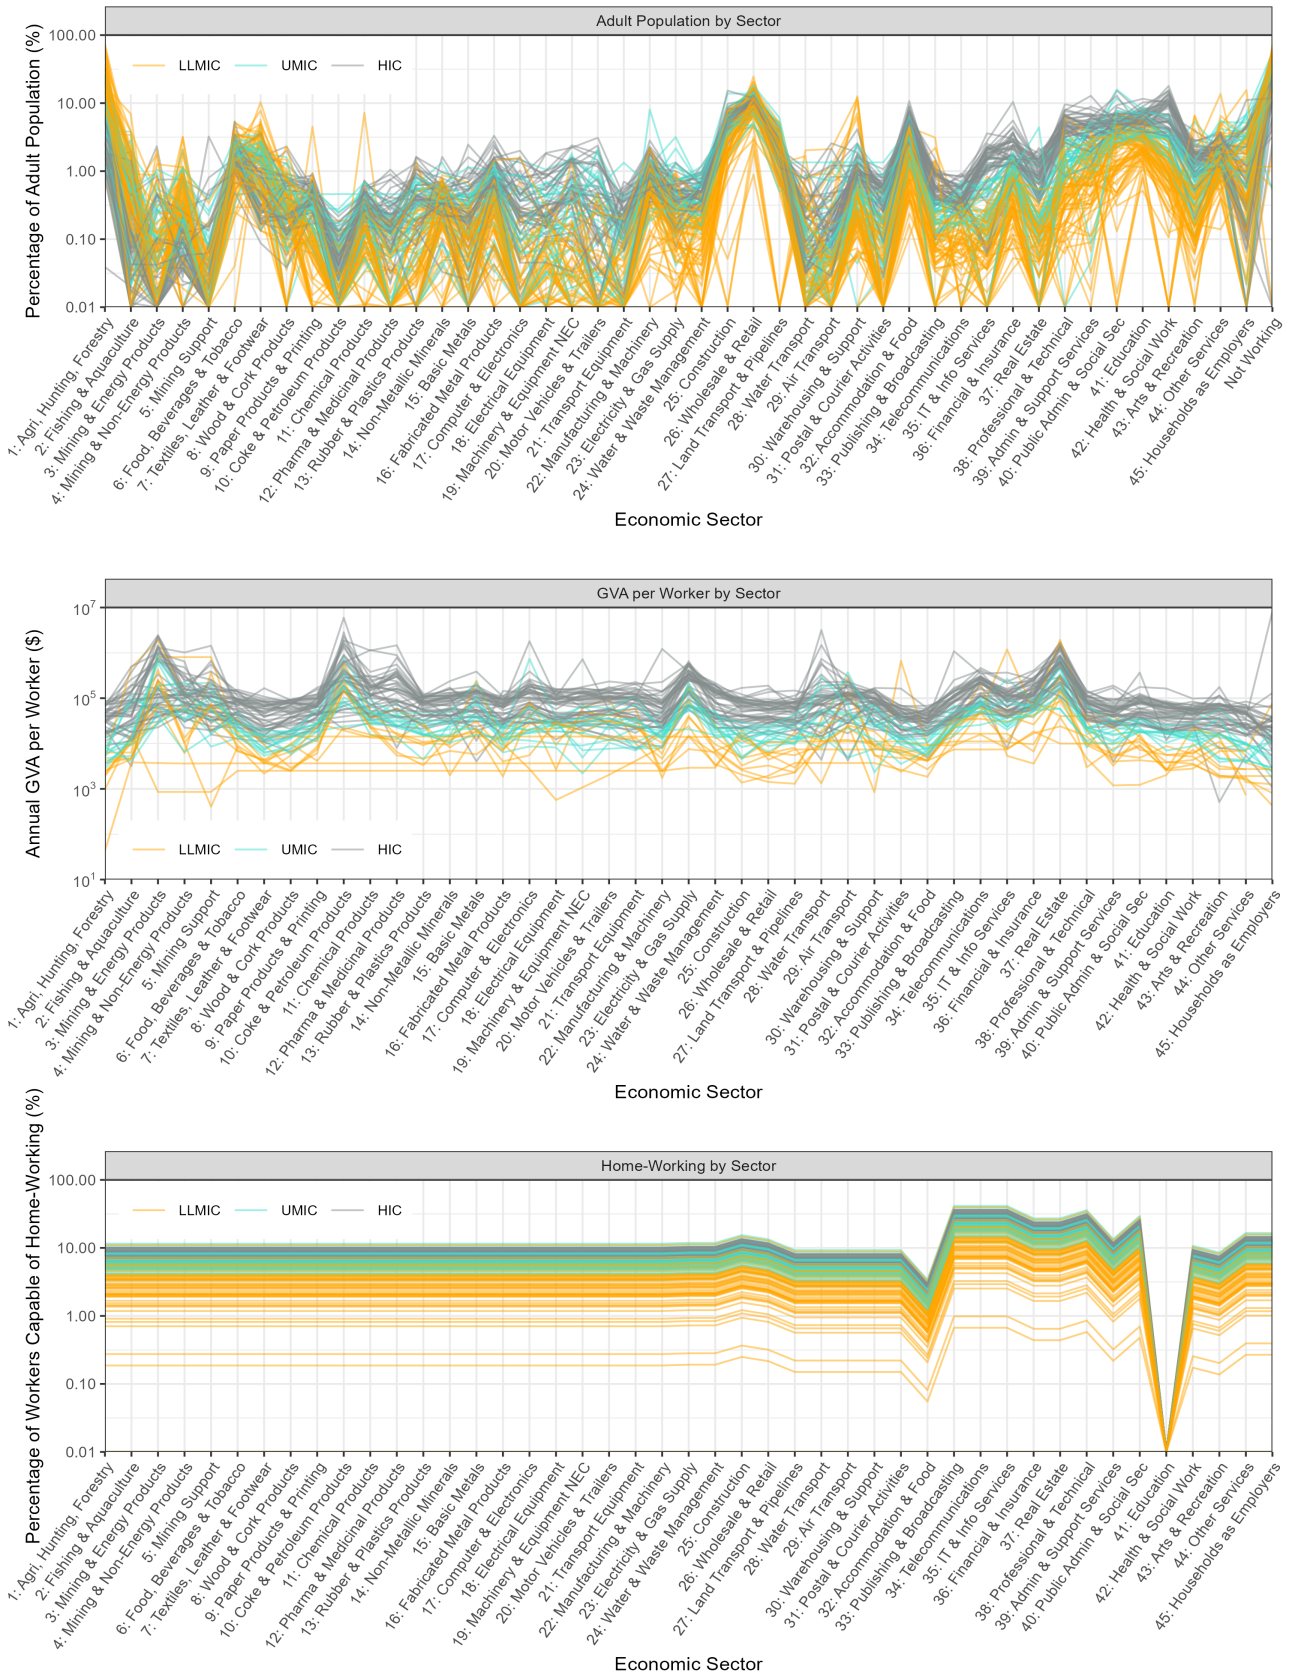

Figure S1: Demographic, mixing and economic data by country-income-group archetype (colours).

## 120 2.2 Disease Epidemiology

121 The original daedalus model and its subsequent applications<sup>15–17</sup> were developed in response to the Covid-19  
122 pandemic, employing a compartmental epidemiological model with heterogeneity of age and economic-sector,  
123 and SEIR natural history. Here, the epidemiological component is generalised to model respiratory diseases with  
124 distinct epidemiological characteristics, defined in terms of transmissibility, delays and severity. Six diseases  
125 are considered, inspired by historic pandemics and pandemic variants caused by the Alphainfluenzavirus and  
126 Betacoronavirus viral genera:

- 127 • Influenza-2009-X
- 128 • Influenza-1957-X
- 129 • Influenza-1918-X
- 130 • Covid-Omicron-X
- 131 • Covid-Delta-X
- 132 • Covid-Wildtype-X.

133 The influenza diseases correspond to the pandemics of 2009 (‘Swine flu’), 1957 (‘Asian flu’) and 1918 (‘Span-  
134 ish flu’) respectively. The coronavirus diseases correspond to the Omicron and Delta variants of Covid-19,  
135 and the pre-Alpha-variant Covid-19 wild type. This set of diseases is epidemiologically diverse (see Table  
136 S1); with low-transmissibility low-severity Influenza-2009-X, low-transmissibility high-severity Influenza-1918-X,  
137 high-transmissibility low-severity Covid-Omicron-X, and high-transmissibility and high-severity Covid-Delta-X  
138 - and Influenza-1957-X and Covid-Wildtype-X in between. The transmission timescales also differ between the  
139 influenza and the coronavirus diseases, with the latter exhibiting longer generation times and hospital length  
140 of stay in general. Mimicking historic pandemics and pandemic variants ensures plausibility, given that the  
141 epidemiological parameter values have been realised in the past. However, it must be emphasised that the aim  
142 of this study is not to reconstruct historic outbreaks - this would require a much more tailored approach, the  
143 acquisition of appropriate epidemiological time series data (e.g., hospital admissions, deaths) and fitting the  
144 epidemiological model to these data - rather, each disease is considered in the hypothetical case. Furthermore,  
145 each disease is considered to be novel - it is assumed that there is no pre-existing natural- or vaccine-induced  
146 immunity, which would inhibit disease transmission and/or severity. For both of the above reasons, the suffix  
147 -X is appended to each disease name, in the spirit of WHO terminology<sup>33</sup>.

In the epidemiological model, transmission and disease progression are described by the distribution of the population across different health states and the evolution of this distribution over time. The health states represent the natural history of disease and mitigation measures imposed in response to the outbreak: at time  $t$ , the population by stratum  $N_j$  is decomposed into susceptible  $S_{j,v}$ , exposed  $E_{j,v}$ , asymptomatic infectious  $I_{j,v}^a$ , symptomatic infectious  $I_{j,v}^s$ , recovered  $R_{j,v}$ , hospitalised  $H_{j,v}$  and dead  $D_{j,v}$  states, and following the imposition of mitigation measures (see section 2.3), isolating asymptomatic infectious  $I_{j,v}^{ai}$ , isolating symptomatic infectious  $I_{j,v}^{si}$  and seroconverting (due to vaccination)  $S_{j,v}^{c_u}$  states are included. The subscript  $v$  denotes vaccination status ( $v = 0$  for unvaccinated and  $v = 1$  for vaccinated), which duplicates the aforementioned health states, and vaccination status transitions occur due to seroconversion and waning of vaccine-induced immunity to infection. The system of ordinary differential equations (ODEs) describing the evolution in time of the distribution of the

population across health states is

$$\begin{aligned}
\frac{dS_{j,v}}{dt} &= \sum_{u=0}^{v-1} k^{12} S_{j,u}^{c_v} + \sum_{u=v+1}^1 k_u^{13,r_v} S_{j,u} - \left( k_{j,v}^1(t) + \sum_{u=v+1}^1 k_{j,v}^{11,c_u}(t) + \sum_{u=0}^{v-1} k_v^{13,r_u} \right) S_{j,v} \\
\frac{dS_{j,v}^{c_u}}{dt} &= k_{j,v}^{11,c_u}(t) S_{j,v} - (k_{j,v}^1(t) + k^{12}) S_{j,v}^{c_u} \\
\frac{dE_{j,v}}{dt} &= k_{j,v}^1(t) \left( S_{j,v} + \sum_{u=v+1}^1 S_{j,v}^{c_u} \right) - (k^2(t) + k^3(t) + k^4(t) + k^5(t)) E_{j,v} \\
\frac{dI_{j,v}^a}{dt} &= k^2(t) E_{j,v} - k^6 I_{j,v}^a \\
\frac{dI_{j,v}^s}{dt} &= k^3(t) E_{j,v} - (k_{j,v}^7(t) + k_{j,v}^8(t)) I_{j,v}^s \\
\frac{dI_{j,v}^{ai}}{dt} &= k^4(t) E_{j,v} - k^6 I_{j,v}^{ai} \\
\frac{dI_{j,v}^{si}}{dt} &= k^5(t) E_{j,v} - (k_{j,v}^7(t) + k_{j,v}^8(t)) I_{j,v}^{si} \\
\frac{dR_{j,v}}{dt} &= k^6 (I_{j,v}^a + I_{j,v}^{ai}) + k_{j,v}^8(t) (I_{j,v}^s + I_{j,v}^{si}) + k_j^{10}(t) H_{j,v} \\
\frac{dH_{j,v}}{dt} &= k_{j,v}^7(t) (I_{j,v}^s + I_{j,v}^{si}) - (k_j^9(t) + k_j^{10}(t)) H_{j,v} \\
\frac{dD_{j,v}}{dt} &= k_j^9(t) H_{j,v},
\end{aligned}$$

148 where the set of health states and the flow structure are independent of disease. In particular, it is assumed that  
149 all asymptomatic infectious individuals recover and that death only occurs following symptomatic infection.  
150 Furthermore, viral evolution is not modelled and it is assumed that there is no waning of infection-induced  
151 immunity or vaccine-induced immunity to severe disease, at least over the timescales considered, but there is  
152 waning of vaccine-induced immunity to infection (see section 2.3).

153 The epidemiological dynamics are determined by the transition rates between health states, denoted  $k^n$  for  
154  $n \in \{1, \dots, 13\}$  above, which are disease-dependent. The epidemiological parameters in Table S1 specify on-  
155 ward infectiousness (transmissibility), the time spent in each health state (delays) and the proportional split  
156 between complementary health states (severity), which are independent of country-income-group archetype, i.e.  
157 income-group-dependent population health or healthcare quality (below hospital capacity - see section 2.3) are  
158 not considered. However, synthetic country demography, economics and mixing introduces localised effects:  
159 transmission is a function of contacts between different economic sectors and non-working age-groups, and  
160 severity is a function of age. Therefore, for each disease, there is a local basic reproduction number and local  
161 population-average IHR and IFR in each synthetic country. Furthermore, almost all transition rates depend on  
162 mitigation measures (see section 2.3), and together these factors determine the overall intensity of an epidemic  
163 realisation. The dependence (or independence) of different transition rates on model stratum  $j$  (economic sector  
164 or non-working age-group), vaccination status  $u, v$  and time  $t$  are indicated in the system of ODEs above, and  
165 these are defined in full in the following section.

| Parameter                                               | Symbol          | Influenza-2009-X         | Influenza-1957-X         | Influenza-1918-X         | Covid-Omicron-X          | Covid-Delta-X            | Covid-Wildtype-X         |
|---------------------------------------------------------|-----------------|--------------------------|--------------------------|--------------------------|--------------------------|--------------------------|--------------------------|
| <b>Transmissibility</b>                                 |                 |                          |                          |                          |                          |                          |                          |
| Mean Basic Reproduction Number                          | $R_0$           | 1.58 <sup>34</sup>       | 1.80 <sup>35</sup>       | 1.80 <sup>35</sup>       | 5.94 <sup>37</sup>       | 5.08 <sup>35</sup>       | 2.87 <sup>39</sup>       |
| Transmission Probability from Symptomatic Contact       | $\beta$         | 0.0426 <sup>34</sup>     | 0.0485 <sup>35</sup>     | 0.0674 <sup>40</sup>     | 0.1201 <sup>37</sup>     | 0.1026 <sup>35</sup>     | 0.0580 <sup>39</sup>     |
| Relative Risk of Transmission from Asymptomatic Contact | $\epsilon$      | 0.58 <sup>31</sup>       | 0.58 <sup>31</sup>       | 0.58 <sup>31</sup>       | 0.58 <sup>41</sup>       | 0.58 <sup>41</sup>       | 0.58 <sup>41</sup>       |
| <b>Delays</b>                                           |                 |                          |                          |                          |                          |                          |                          |
| Latent Period                                           | $T^{L:T}$       | 1.1 <sup>42</sup>        | 1.1 <sup>42</sup>        | 1.1 <sup>42</sup>        | 4.0 <sup>43</sup>        | 4.0 <sup>43</sup>        | 4.6 <sup>44</sup>        |
| Infectious Period for Asymptomatic Infection            | $T^{I^a:R}$     | 2.5 <sup>42</sup>        | 2.5 <sup>42</sup>        | 2.5 <sup>42</sup>        | 2.1 <sup>44</sup>        | 2.1 <sup>44</sup>        | 2.1 <sup>44</sup>        |
| Infectious Period for Symptomatic Infection             | $T^{I^s:R}$     | 2.5 <sup>42</sup>        | 2.5 <sup>42</sup>        | 2.5 <sup>42</sup>        | 4.0 <sup>44</sup>        | 4.0 <sup>44</sup>        | 4.0 <sup>44</sup>        |
| Time from Infectiousness to Hospital-Admission          | $T^{I^s:H}$     | 2.5 <sup>42</sup>        | 2.5 <sup>42</sup>        | 2.5 <sup>42</sup>        | 4.0 <sup>44</sup>        | 4.0 <sup>44</sup>        | 4.0 <sup>44</sup>        |
| Time from Hospital-Admission to Recovery                | $T^{H:R}$       | 5.0 <sup>45</sup>        | 5.0 <sup>45</sup>        | 5.0 <sup>45</sup>        | 5.5 <sup>46</sup>        | 7.6 <sup>46</sup>        | 12.0 <sup>47</sup>       |
| Time from Hospital-Admission to Death                   | $T^{H:D}$       | 5.0 <sup>45</sup>        | 5.0 <sup>45</sup>        | 5.0 <sup>45</sup>        | 5.5 <sup>46</sup>        | 7.6 <sup>46</sup>        | 12.0 <sup>47</sup>       |
| <b>Severity</b>                                         |                 |                          |                          |                          |                          |                          |                          |
| Symptomatic Infection Ratio                             | $p^{I^s}$       | 0.67 <sup>48</sup>       | 0.67 <sup>48</sup>       | 0.67 <sup>48</sup>       | 0.59 <sup>49</sup>       | 0.59 <sup>49</sup>       | 0.59 <sup>49</sup>       |
| Infection Hospitalisation Ratio (IHR)                   | $\bar{p}^{IHR}$ | 0.0047                   | 0.0009                   | 0.1222                   | 0.0000                   | 0.0000                   | 0.0000                   |
| 0-4 years                                               |                 | 0.0018                   | 0.0009                   | 0.0213                   | 0.0000                   | 0.0000                   | 0.0000                   |
| 5-9 years                                               |                 | 0.0018                   | 0.0009                   | 0.0256                   | 0.0006                   | 0.0008                   | 0.0000                   |
| 10-14 years                                             |                 | 0.0018                   | 0.0009                   | 0.0526                   | 0.0006                   | 0.0008                   | 0.0004                   |
| 15-19 years                                             |                 | 0.0018                   | 0.0009                   | 0.0910                   | 0.0083                   | 0.0192                   | 0.0004                   |
| 20-24 years                                             |                 | 0.0018                   | 0.0009                   | 0.1564                   | 0.0083                   | 0.0192                   | 0.0104                   |
| 25-29 years                                             |                 | 0.0038                   | 0.0009                   | 0.1322                   | 0.0197                   | 0.0635                   | 0.0104                   |
| 30-34 years                                             |                 | 0.0038                   | 0.0009                   | 0.1180                   | 0.0197                   | 0.0635                   | 0.0343                   |
| 35-39 years                                             |                 | 0.0038                   | 0.0009                   | 0.0881                   | 0.0157                   | 0.0786                   | 0.0343                   |
| 40-44 years                                             |                 | 0.0038                   | 0.0009                   | 0.0640                   | 0.0157                   | 0.0786                   | 0.0425                   |
| 45-49 years                                             |                 | 0.0071                   | 0.0226                   | 0.0626                   | 0.0211                   | 0.1510                   | 0.0425                   |
| 50-54 years                                             |                 | 0.0071                   | 0.0226                   | 0.0881                   | 0.0211                   | 0.1510                   | 0.0816                   |
| 55-59 years                                             |                 | 0.0071                   | 0.0226                   | 0.0626                   | 0.0306                   | 0.2183                   | 0.0816                   |
| 60-64 years                                             |                 | 0.0071                   | 0.0226                   | 0.1649                   | 0.0306                   | 0.2183                   | 0.1180                   |
| 65-69 years                                             |                 | 0.0103                   | 0.1806                   | 0.2218                   | 0.0614                   | 0.3071                   | 0.1180                   |
| 70-74 years                                             |                 | 0.0103                   | 0.1806                   | 0.2644                   | 0.0614                   | 0.3071                   | 0.1660                   |
| 75-79 years                                             |                 | 0.0103                   | 0.1806                   | 0.2644                   | 0.1123                   | 0.3404                   | 0.1660                   |
| 80+ years                                               |                 | 0.0103                   | 0.1806                   | 0.2644                   | 0.1123                   | 0.3404                   | 0.1840                   |
| Infection Fatality Ratio (IFR)                          | $\bar{p}^{IFR}$ | 0.0002                   | 0.0001                   | 0.0153                   | 0.0000                   | 0.0000                   | 0.0000                   |
| 0-4 years                                               |                 | 0.0001                   | 0.0001                   | 0.0027                   | 0.0000                   | 0.0000                   | 0.0000                   |
| 5-9 years                                               |                 | 0.0001                   | 0.0001                   | 0.0032                   | 0.0001                   | 0.0001                   | 0.0000                   |
| 10-14 years                                             |                 | 0.0001                   | 0.0001                   | 0.0066                   | 0.0001                   | 0.0001                   | 0.0001                   |
| 15-19 years                                             |                 | 0.0001                   | 0.0001                   | 0.0114                   | 0.0002                   | 0.0006                   | 0.0001                   |
| 20-24 years                                             |                 | 0.0001                   | 0.0001                   | 0.0195                   | 0.0002                   | 0.0006                   | 0.0003                   |
| 25-29 years                                             |                 | 0.0002                   | 0.0001                   | 0.0165                   | 0.0005                   | 0.0016                   | 0.0003                   |
| 30-34 years                                             |                 | 0.0002                   | 0.0001                   | 0.0148                   | 0.0005                   | 0.0016                   | 0.0008                   |
| 35-39 years                                             |                 | 0.0002                   | 0.0001                   | 0.0110                   | 0.0006                   | 0.0016                   | 0.0008                   |
| 40-44 years                                             |                 | 0.0002                   | 0.0001                   | 0.0080                   | 0.0006                   | 0.0030                   | 0.0016                   |
| 45-49 years                                             |                 | 0.0004                   | 0.0017                   | 0.0080                   | 0.0006                   | 0.0030                   | 0.0016                   |
| 50-54 years                                             |                 | 0.0004                   | 0.0017                   | 0.0110                   | 0.0015                   | 0.0110                   | 0.0060                   |
| 55-59 years                                             |                 | 0.0004                   | 0.0017                   | 0.0078                   | 0.0015                   | 0.0110                   | 0.0060                   |
| 60-64 years                                             |                 | 0.0066                   | 0.0134                   | 0.0206                   | 0.0050                   | 0.0357                   | 0.0193                   |
| 65-69 years                                             |                 | 0.0066                   | 0.0134                   | 0.0277                   | 0.0050                   | 0.0357                   | 0.0193                   |
| 70-74 years                                             |                 | 0.0066                   | 0.0134                   | 0.0331                   | 0.0158                   | 0.0792                   | 0.0428                   |
| 75-79 years                                             |                 | 0.0066                   | 0.0134                   | 0.0331                   | 0.0158                   | 0.0792                   | 0.0428                   |
| 80+ years                                               |                 | 0.0066                   | 0.0134                   | 0.0331                   | 0.0476                   | 0.1443                   | 0.0780                   |
|                                                         |                 | Calculated <sup>55</sup> | Calculated <sup>56</sup> | Calculated <sup>57</sup> | Calculated <sup>52</sup> | Calculated <sup>53</sup> | Calculated <sup>54</sup> |

**Table S1:** Epidemiological parameter values of the six diseases considered. Transmissibility parameters (excluding reproduction numbers) are reported as proportions, delay parameters in days and severity parameters as proportions. For each disease, the transmission probability from symptomatic contacts  $\beta$  is fixed and this defines a local basic reproduction number  $R_0$  in each synthetic country, which is calculated using the next-generation method<sup>58,59</sup>. The values of  $\beta$  are calculated such that the mean reproduction number across all synthetic countries in all country-income-group archetypes  $\bar{R}_0$  matches the prescribed value for each disease. In the absence of parameter estimates for a historic pandemic or pandemic variant, values were assumed based on similar diseases. Case hospitalisation and fatality ratios reported in the literature were interpreted to pertain to symptomatic infections only, and infection hospitalisation and fatality ratios  $\bar{p}^{IHR}$  and  $\bar{p}^{IFR}$  were calculated by multiplying by the associated symptomatic infection ratio  $p^I$ .

## 166 2.3 Mitigation Measures

167 In response to a disease outbreak in a synthetic country, four different mitigation measures are imposed: dis-  
 168 tancing, case isolation, hospital capacity and vaccination. The mitigation measures are modelled in an identical  
 169 manner for each country-income-group archetype but the parametrisation is income-group-dependent, with pa-  
 170 rameters drawn from distributions fitted to Covid-19 data. To allow for interdependencies between mitigation  
 171 parameters within each income group, a Gaussian copula approach is employed, where marginal distributions  
 172 are fitted to parameter data separately (see Figure S2). Using the fitted marginal distributions, the observed  
 173 data are transformed to z-scores and correlation coefficients are estimated for each pair of parameters in turn  
 174 (see Figure S3). The mitigation parameters are most-strongly correlated in LLMICs, which encompasses coun-  
 175 tries with a wide range of response capabilities, where there are strong and significant associations between the  
 176 testing rate and (earlier) vaccination administration start-time, administration rate and coverage, and between  
 177 the vaccination administration rate and coverage. The significance of the association between the vaccination  
 178 administration rate and coverage extends to UMICs and HICs, but with slightly and moderately weaker corre-  
 179 lation coefficients, respectively. During simulations, samples are drawn from a multivariate normal distribution  
 180 with income-group-specific correlation matrix, then independently transformed to the unit interval using the  
 181 standard-normal cumulative density function and mapped back through the inverse marginal cumulative distri-  
 182 bution functions to obtain parameter realisations. The implementation of mitigation measures over time for a  
 183 sample of synthetic countries in each income-group archetype are shown in Figure S4 for illustrative purposes.  
 184 Furthermore, the effectiveness of each mitigation measure is a function of time-dependent epidemiological output  
 185 variables and thus endogenous to the local outbreak, as discussed below. Mitigation measures also encompass  
 186 both government mandates and behavioural changes independent of mandates, such as adherence/compliance,  
 187 although it is very difficult to disentangle the relative contributions of each factor in the Covid-19 data - however,  
 188 this is not the objective of the current study. Each mitigation measure is discussed in detail below.

### 189 Distancing

Distancing as a mitigation measure refers to the physical and social distancing non-pharmaceutical interventions (NPIs) that reduce transmission (either the number of contacts or the probability of transmission given infectious contact), driven by the combined effects of government mandates and human behaviour (which are not disentangled), but do not incur an economic loss from a societal perspective. Examples include mask-wearing, personal hygiene, social bubbles and limits to social gatherings, and exclude case isolation, economic closures, school closures and home-working, each of which are modelled separately (see subsequent paragraphs and section 2.4). Distancing is modelled as a time-dependent multiplier within the force-of-infection term, denoted  $k_{j,v}^1(t)$  in the system of ODEs above, which dampens transmission independent of location. Specifically, the force-of-infection term is written as

$$k_{j,v}^1(t) = \eta_v^E \rho(t) \beta \sum_{j'} M_{j,j'}(t) I_{j'}(t) / N_{j'},$$

190 where  $M(t)$  is the time-dependent total contact matrix (see section 2.1),  $I_{j'}(t)/N_{j'}$  is disease prevalence ad-  
 191 justed for infectiousness,  $\beta$  is the disease-dependent transmission probability given symptomatic contact (see  
 192 Table S1),  $\rho(t)$  is the distancing transmission multiplier and  $\eta_v^E$  is the relative risk of infection given vac-  
 193 cination status  $v$  (see subsequent paragraphs). The numerator of the disease prevalence term is  $I_{j'}(t) =$   
 194  $\sum_{v'} \eta_{v'}^I (\epsilon I_{j',v'}^a(t) + I_{j',v'}^s(t) + \epsilon \zeta^a(t) I_{j',v'}^{ai}(t) + \zeta_{j,v}^s(t) I_{j',v'}^{si}(t))$ , where  $\epsilon$  is the relative risk of transmission given  
 195 asymptomatic contact (see Table S1),  $\zeta^a(t)$  and  $\zeta_{j,v}^s(t)$  are the relative risk of transmission given isolating  
 196 asymptomatic and symptomatic contacts respectively (see subsequent paragraphs), and  $\eta_v^I$  is the relative risk  
 197 of transmission given vaccination status  $v$  (see subsequent paragraphs).

The distancing transmission multiplier is modelled using a logistic function of the form

$$\rho(t) = \left( \frac{1}{1 + \exp(c^0 + c^{death} \log_{10}(D^{new}(t)) - c^{time}(t - T^{res}))} \right)^{\mathbb{1}_{\{t \geq T^{res}\}}},$$

198 where  $T^{res}$  is the response time when distancing takes effect,  $c^0$  is the intercept coefficient that controls the over-  
 199 all reduction in transmission independent of time,  $c^{death}$  is the death-sensitivity coefficient that controls the re-  
 200 duction in transmission as the number of daily deaths per 100k population  $D^{new}(t) = \sum_{j,v} k_j^9(t) H_{j,v}(t) / (\sum_j N_j / 10^5)$   
 201 increases and  $c^{time}$  is the time-decay coefficient that controls the speed at which transmission returns to pre-  
 202 pandemic levels over time. This functional form was selected based on Covid-19 mobility data<sup>60</sup>, which is used

203 as a proxy for distancing: specifically, the percentage reduction in mobility averaged across retail and recre-  
 204 ation, grocery and pharmacy, and transit stations is mapped linearly to the transmission multiplier on the unit  
 205 interval, and this broadly decreases during Covid-19 waves due to infection avoidance and increases over time  
 206 due to factors such as the relaxation of NPIs, reduced adherence to interventions and pandemic fatigue. Here, it  
 207 is assumed that death is the epidemiological driver of the reduction in transmission, since this best generalises  
 208 beyond Covid-19 to diseases with variable transmissibility and severity profiles. Therefore, distancing is fully  
 209 endogenous to the local outbreak.

210 Data for the transmission multiplier parameters were generated on a country-by-country basis as follows. The  
 211 response time  $T^{res}$  is defined to be the time delay from 1<sup>st</sup> January 2020 until the day the Blavatnik stringency  
 212 index<sup>61</sup> reaches a value of 20%, normalised by the (fixed) doubling time of Covid-19<sup>62</sup>. Without normalisation,  
 213 the range of response times observed for Covid-19 may be entirely inappropriate for diseases with very different  
 214 characteristics, and so the doubling time is used here as a scaling factor. The intercept coefficient  $c^0$ , the death-  
 215 sensitivity coefficient  $c^{death}$  and the time-decay coefficient  $c^{time}$  are determined by fitting the logistic function  
 216 above to the aforementioned mobility data, given the calculated response time  $T^{res}$  and daily death data  
 217 for Covid-19<sup>63</sup> adjusted for under-reporting<sup>64</sup>. These country-level parameter data are stratified by country-  
 218 income-group archetype and for each parameter, a set of candidate distributions are fitted with the `fitdist`  
 219 package<sup>65</sup> using maximum likelihood estimation. The candidate distributions with lowest Akaike information  
 220 criterion (AIC) values are identified, from which simulation parameters are drawn. The distancing parameter  
 221 marginal distributions are shown in Figure S2 in light blue. In HICs, the mean response time is lowest and the  
 222 mean time-decay coefficient is lowest, both of which result in reduced transmission and favourable outcomes.  
 223 Since the response time is drawn in units of doubling times, it is converted to units of days by multiplication  
 224 with the local doubling time of the synthetic country and disease in question before simulation. Illustrative  
 225 values of the transmission multiplier for a sample of synthetic countries in each income-group archetype, as a  
 226 function of daily deaths and time since the response time, are shown in Figure S4.

## 227 Case Isolation

Case isolation as a mitigation measures encompasses the detection and mandatory isolation of a proportion of the  
 infectious, contingent on the operation of an effective testing and surveillance system, with the aim of reducing  
 transmission - potentially to the point of suppression. Case detection is modelled in a stylised manner by the  
 diversion of a proportion of the asymptomatic and symptomatic infectious to corresponding ‘isolating’ health  
 states, controlled by time-dependent infection ascertainment ratios within the latent-to-infectious transition  
 rates. Specifically, the latent-to-infectious transition rates are written as

$$\begin{aligned} k^2(t) &= \frac{(1 - \alpha^a(t))(1 - p^{I^s})}{T^{E:I}} \\ k^3(t) &= \frac{(1 - \alpha^s(t))p^{I^s}}{T^{E:I}} \\ k^4(t) &= \frac{\alpha^a(t)(1 - p^{I^s})}{T^{E:I}} \\ k^5(t) &= \frac{\alpha^s(t)p^{I^s}}{T^{E:I}}, \end{aligned}$$

228 where  $T^{E:I}$  is the latent period and  $p^{I^s}$  is the symptomatic infection ratio (see Table S1), and  $\alpha^a(t)$  and  $\alpha^s(t)$   
 229 are the infection ascertainment ratios (IARs) of the asymptomatic and symptomatic respectively.

The IARs are written

$$\begin{aligned} \alpha^a(t) &= \mathbb{1}_{\{T^{test} \leq t < T^{open}\}} \mathbb{1}_{\{I^{tot}(t) < I^{thresh}\}} \min \left( p^{asc}, \left[ \frac{a^{test} - H^{new}(t)}{I^{new}(t)} \right]^+ \right) \\ \alpha^s(t) &= \mathbb{1}_{\{T^{test} \leq t < T^{open}\}} \left[ \mathbb{1}_{\{I^{tot}(t) < I^{thresh}\}} \min \left( p^{asc}, \left[ \frac{a^{test} - H^{new}(t)}{I^{new}(t)} \right]^+ \right) \right. \\ &\quad \left. + (1 - \mathbb{1}_{\{I^{tot}(t) < I^{thresh}\}}) \min \left( p^{asc}, \left[ \frac{a^{test} - H^{new}(t)}{I^{s,new}(t)} \right]^+ \right) \right], \end{aligned}$$

230 where  $T^{test}$  is the testing start-time when case isolation takes effect and  $T^{open}$  is the time when mandated  
 231 sector closures and home-working are lifted and testing and case isolation end (see section 2.4),  $I^{tot}(t) =$

232  $\sum_{j,v} (E_{j,v}(t) + I_{j,v}^a(t) + I_{j,v}^s(t) + I_{j,v}^{ai}(t) + I_{j,v}^{si}(t) + H_{j,v}(t))$  is disease prevalence and  $I^{thresh} = \sum_j N_j/10^7$  is  
 233 a fixed prevalence threshold,  $p^{asc}$  is the maximum infection ascertainment ratio,  $a^{test}$  is the population-  
 234 level testing rate,  $H^{new}(t) = \sum_{j,v} k_{j,v}^I(t) (I_{j,v}^s(t) + I_{j,v}^{si}(t))$  is daily hospital admissions, and  $I^{new}(t) =$   
 235  $\sum_{j,v} k_{j,v}^1(t) (S_{j,v}(t) + \sum_{u=v+1}^1 S_{j,v}^{c_u}(t))$  and  $I^{s,new}(t) = p^{I^s} I^{new}(t)$  are total and symptomatic incidence, re-  
 236 spectively. The functional form for the IARs relates case detection to testing, whereby ascertainment is zero in  
 237 the absence of testing and only non-zero in the time interval  $T^{test} \leq t < T^{open}$ , but also encodes an explicit  
 238 dependence on disease prevalence and distinguishes two ascertainment régimes above and below the prevalence  
 239 threshold: when  $I(t) > I^{thresh}$ , only the symptomatic infectious are detected up to a maximum of  $p^{asc}$ , but  
 240 when  $I(t) < I^{thresh}$ , both the asymptomatic and symptomatic infectious are detected at the same level. The  
 241 rationale behind this assumption is that the symptomatic infectious can be detected via either symptom-driven  
 242 testing or contact tracing, while the asymptomatic infectious can only be detected via contact tracing, and it is  
 243 unlikely that a substantial proportion of cases are detected via contact tracing unless prevalence is low and close  
 244 to (local) extinction<sup>66,67</sup>. The IARs are also restricted by the testing rate, accounting for the ‘pillar’ of testing  
 245 of those admitted to care,<sup>68</sup> where the upper bound is assumed to be the ratio of the extra-hospital testing  
 246 rate to incidence (symptomatic and total incidence in the low- and high-ascertainment régimes, respectively).

However, ascertainment does not imply that the transmission risk from detected cases is zero, due to factors  
 such as presymptomatic transmission, barriers to testing, testing turnaround times and contact tracing delays.  
 Hence, the effectiveness of case isolation is modelled as time-dependent relative risks of transmission for the  
 isolating within the force-of-infection term, with the underlying assumption that transmission risk is determined  
 by the ratio of the ‘effective’ infectious period to the disease-dependent infectious period (see Table S1), where  
 the effective infectious period is interpreted here to be the time from infectiousness to isolation. Specifically,  
 the relative risk of transmission for the isolating asymptomatic and symptomatic infectious are

$$\begin{aligned}
 \zeta^a(t) &= 1 + \mathbb{1}_{\{T^{test} \leq t < T^{open}\}} \mathbb{1}_{\{I^{tot}(t) < I^{thresh}\}} \left( \frac{\min(T^{I: Iso, \bar{\alpha}}, T^{I^a: R})}{T^{I^a: R}} - 1 \right) \\
 \zeta_{j,v}^s(t) &= 1 + \mathbb{1}_{\{T^{test} \leq t < T^{open}\}} \left[ \mathbb{1}_{\{I^{tot}(t) < I^{thresh}\}} \left( \frac{\min(T^{I: Iso, \bar{\alpha}}, T_{j,v}^{I^s}(t))}{T_{j,v}^{I^s}(t)} - 1 \right) \right. \\
 &\quad \left. + (1 - \mathbb{1}_{\{I^{tot}(t) < I^{thresh}\}}) \left( \frac{\min(T^{I: Iso, \underline{\alpha}}, T_{j,v}^{I^s}(t))}{T_{j,v}^{I^s}(t)} - 1 \right) \right]
 \end{aligned}$$

247 respectively, where  $T^{I^a: R}$  is the infectious period for asymptomatic infection (see Table S1),  $T_{j,v}^{I^s}(t) =$   
 248  $T^{I^s: H}(p_{j,v}^H(t)) + T^{I^s: R}(1 - p_{j,v}^H(t))$  is the infectious period for symptomatic infection averaged across outcomes (see  
 249 Table S1) with time-dependent symptomatic infection hospitalisation ratio  $p_{j,v}^H(t)$  (see subsequent paragraphs),  
 250 and  $T^{I: Iso, \bar{\alpha}}$  and  $T^{I: Iso, \underline{\alpha}}$  are the times from infectiousness to isolation for the high- and low-ascertainment  
 251 régimes described above. These delays are defined in turn as the difference between the times from infection  
 252 to isolation and the time from infection to infectiousness, i.e., the latent period. Here, it is assumed that  
 253 the times from infection to isolation for both the high- and low-ascertainment régimes are fixed values that  
 254 are disease-independent, reflecting the operation of a testing and surveillance system and the corresponding  
 255 delays associated with testing turnaround, notification and contact-tracing, irrespective of the disease in ques-  
 256 tion. Summing estimates of the Covid-19 incubation period of 5.8 days<sup>69</sup> and symptom-onset to isolation  
 257 delay for traced-cases of -0.8<sup>70</sup> and general cases of 2.4<sup>71</sup>, the times from infection to isolation for the high-  
 258 and low-ascertainment régimes are calculated to be 5 days and 8.2 days respectively, and thus the times from  
 259 infectiousness to isolation are defined as  $T^{I: Iso, \bar{\alpha}} = [5 - T^{E: I}]^+$  and  $T^{I: Iso, \underline{\alpha}} = [8.2 - T^{E: I}]^+$ , scaling linearly  
 260 with the disease-dependent latent period  $T^{E: I}$ . Substituting the parameter values in Table S1 into the above  
 261 equations yields disease- and ascertainment régime-dependent values of  $\zeta^a(t)$  and  $\zeta_{j,v}^s(t)$ : for the influenza dis-  
 262 eases, there is no reduction in transmission for the isolating asymptomatic or symptomatic infectious in either  
 263 régime since both latent and infectious periods are very short, hence case isolation as a mitigation measure is  
 264 ineffective; for the coronavirus diseases, there is little reduction in transmission in the low-ascertainment régime,  
 265 but in the high-ascertainment régime there is a more substantial reduction in transmission with relative risks  
 266 ranging from 0.19-0.48 for the asymptomatic infectious and 0.1-0.25 for the symptomatic infectious. Though  
 267 stylised, the scaling of the effectiveness of case isolation with latent and infectious periods is consistent with  
 268 previous work on outbreak control, case isolation and contact-tracing<sup>72-74</sup>. The set-up is also generalisable to  
 269 diseases with variable transmissibility, delays and severity: the symptomatic infection ratio determines whether  
 270 the asymptomatic or symptomatic IAR and relative transmission risk applies, model-endogenous disease preva-  
 271 lence dictates the ascertainment régime that applies, and the latent and infectious periods control the relative  
 272 risk of transmission for the isolating infectious (see S1). Therefore, case isolation is also fully endogenous to the  
 273 local outbreak.

274 Testing data were generated on a country-by-country basis by fitting a ramp function to Covid-19 testing  
275 data<sup>75</sup>, specifically the time series of cumulative tests normalised by population. The testing start-time  $T^{test}$   
276 is defined to be the time delay from 1<sup>st</sup> January 2020 normalised by the (fixed) doubling time of Covid-19<sup>62</sup>,  
277 as for the response time. The testing rate  $a^{test}$  is assumed to be disease-independent. Ascertainment data  
278 were generated by averaging Covid-19 symptomatic infection ascertainment ratios for various countries over  
279 time<sup>76</sup>, which are also assumed to be disease-independent. As before, these country-level parameter data are  
280 stratified by country-income-group archetype and a set of candidate distributions are fitted with the `fitdist`  
281 package<sup>65</sup> using maximum likelihood estimation. The candidate distributions with lowest Akaike information  
282 criterion (AIC) values are identified, from which simulation parameters are drawn. The case isolation parameter  
283 marginal distributions are shown in Figure S2 in light green. The mean testing start-time is largest in LLMICs  
284 and smallest in HICs, while the mean testing rate is lowest in LLMICs and highest in HICs, reflecting existing  
285 testing and surveillance system vulnerabilities in lower-income countries. Since the testing start-time is drawn  
286 in units of doubling times, it is converted to units of days by multiplication with the local doubling time of the  
287 synthetic country and disease in question before simulation. The testing rate is drawn per capita and multiplied  
288 by the local population before simulation. Illustrative values of the maximum infection ascertainment ratio for  
289 a sample of synthetic countries in each income-group archetype, as a function of time since the outbreak, are  
290 shown in Figure S4. Note that it is the maximum IAR that is plotted here, rather than the prevalence-dependent  
291 asymptomatic and symptomatic IARs, for ease of exposition.

## 292 Hospital Capacity

Hospital capacity as a mitigation measure refers to the ability of the health system to cater to pandemic patients, including the availability of hospital beds, equipment, therapeutics and healthcare workers. In particular, the IFRs displayed in Table S1 are interpreted to reflect patient outcomes given the appropriate level of care. But if the health system is not resilient and the healthcare demand induced by the pandemic exceeds the available supply, then patient outcomes will deteriorate due to overutilisation. Hence, healthcare provision is modelled as a time-dependent hospitalisation fatality ratio (HFR) in the hospital outcome transition rates, denoted  $k_j^9(t)$  and  $k_j^{10}(t)$  in the system of ODEs above, which increases when hospital occupancy exceeds the fixed spare hospital beds threshold. Specifically, the complementary hospital outcome transition rates are written as

$$k_j^9(t) = \frac{p_j^D(t)}{T_j^H(t)}$$

$$k_j^{10}(t) = \frac{1 - p_j^D(t)}{T_j^H(t)},$$

293 where  $p_j^D(t)$  is the time-dependent HFR and  $T_j^H(t) = T^{H:D}(p_j^D(t)) + T^{H:R}(1 - p_j^D(t))$  is the length-of-stay  
294 averaged across outcomes (see Table S1).

The HFR is modelled as a linear function of hospital occupancy and is written

$$p_j^D(t) = \left( 1 + 1.87 \left[ \frac{H^{tot}(t) - H^{max}}{H^{max}} \right]^+ \right) \hat{p}_{g(j)}^D,$$

where  $\hat{p}_{g(j)}^D$  is the baseline HFR,  $H^{tot}(t) = \sum_{j,v} H_{j,v}(t)$  is current hospital occupancy and  $H^{max}$  is the number of spare hospital beds. Below capacity, the HFR is identical to the baseline value, but beyond this threshold, the HFR increases with occupancy. The scaling factor of 1.87, referred to as the hospital surge HFR, was estimated from a similar model applied to the Covid-19 pandemic in Indonesia<sup>16</sup> and it is assumed that this same value applies to other diseases. The baseline HFR is disease-dependent and is mapped from five-year age-bands to the model age-groups weighting by population and IHR, specifically

$$\hat{p}_g^D = \sum_{a \in g} \frac{\tilde{p}_a^{IFR}}{\tilde{p}_a^{IHR}} \frac{\tilde{p}_a^{IHR} \tilde{N}_a}{\sum_{a' \in g} \tilde{p}_{a'}^{IHR} \tilde{N}_{a'}}.$$

295 Therefore, healthcare provision is endogenous to the local outbreak. Factors relating to healthcare-seeking  
296 behaviour are not modelled, nor are barriers to care beyond the supply of hospital beds.

297 Data for spare hospital beds were generated on a country-by-country basis: total hospital bed data were sourced  
298 from the World Bank<sup>77</sup> and bed occupancy rate (BOR) data from the WHO<sup>78</sup>. Spare hospital beds  $H^{max}$  (per  
299 capita) is then defined as the product of total hospital beds per 100k population and the complement of the BOR;

300 if BOR data were unavailable, a value of 85% was assumed<sup>79</sup>. As before, these country-level parameter data are  
 301 stratified by country-income-group archetype and a set of candidate distributions are fitted with the `fitdist`  
 302 package<sup>65</sup> using maximum likelihood estimation. The candidate distributions with lowest Akaike information  
 303 criterion (AIC) values are identified, from which simulation parameters are drawn. The hospital capacity  
 304 parameter marginal distributions are shown in Figure S2 in purple. The mean hospital capacity is lowest in  
 305 LLMICs and highest in HICs, reflecting existing health system vulnerabilities in lower-income countries. Since  
 306 the number of spare hospital beds is drawn per capita, it is multiplied by the local population before simulation.  
 307 Illustrative values of the number of spare hospital beds for a sample of synthetic countries in each income-group  
 308 archetype are also shown in Figure S4, where it is noted that these are time-independent.

## 309 Vaccination

310 Vaccination as a mitigation measure refers to the administration of a strain-specific but imperfect vaccine  
 311 to a proportion of the population (determined by the combined effects of government mandates and human  
 312 behaviour, which again are not disentangled) a period of time after the outbreak begins. The protective effects of  
 313 the vaccine not only reduce transmission and adverse outcomes among the vaccinated population, but also reduce  
 314 transmission among the unvaccinated population due to the positive externalities of vaccination. Vaccination  
 315 is modelled as a duplication of the health states in the system of ODEs above, indexed by the subscript  $v$   
 316 where  $v = 0$  represents the unvaccinated and  $v = 1$  the vaccinated, and vaccination confers partial protection  
 317 against infection, hospitalisation/severe disease and onward transmission. Vaccination status transitions occur  
 318 due to vaccine administration and seroconversion ( $v = 0 \rightarrow v = 1$ ), depending on the administration start-time,  
 319 administration rate and coverage, and waning of vaccine-induced immunity to infection over time ( $v = 1 \rightarrow v =$   
 320  $0$ ). Here, ‘vaccinated’ is interpreted to be the completion of a two-dose schedule, and only full and not partial  
 321 vaccination is modelled. In particular, the protective effects of vaccination do not apply to the seroconverting  
 322 health state  $S_{j,v}^{cu}$ .

The vaccine administration transition rate, denoted  $k_{j,v}^{11,cu}(t)$  in the system of ODEs above, is written as

$$k_{j,v=0}^{11,c1}(t) = \frac{\psi_j(t)}{S_{j,v=0}(t) + E_{j,v=0}(t) + I_{j,v=0}^a(t) + I_{j,v=0}^s(t) + I_{j,v=0}^{ai}(t) + I_{j,v=0}^{si}(t) + R_{j,v=0}(t) + H_{j,v=0}(t) + D_{j,v=0}(t)},$$

where the numerator  $\psi_j(t)$  is the total number of vaccines administered per day to stratum  $j$  at time  $t$  that are  
 distributed uniformly among all unvaccinated health states in the denominator, reflecting vaccine wastage due  
 to immunological redundancy. Here,

$$\psi_j(t) = \mathbb{1}_{\{T_{\pi^{-1}(g(j))}^{vax} \leq t < T_{\pi^{-1}(g(j))+1}^{vax}\}} \frac{a^{vax} N_j}{\hat{N}_{g(j)}},$$

where  $a^{vax}$  is the population-level vaccine administration rate and

$$T_h^{vax} = T^{vax} + \sum_{s=1}^{h-1} \frac{\hat{N}_{\pi(s)} \hat{p}_{\pi(s)}^{vax}}{a^{vax}}$$

323 represents the time of vaccine rollout to priority group  $h$ , given initial vaccine administration start-time  $T^{vax}$ ,  
 324 population-level vaccine coverage  $p^{vax}$  and permutation function  $\pi : h \rightarrow g$  that assigns priority group order  $h$   
 325 to model age-group  $g$ . Note that  $T_5^{vax}$  represents the vaccine administration end-time.

The seroconversion transition rate, denoted  $k^{12}$  in the system of ODEs above, is written as

$$k^{12} = \frac{1}{T^c},$$

where  $T^c$  is the time from vaccination to seroconversion/development of immunity (see Table S2). Compared to  
 the unvaccinated, the vaccinated have reduced relative risk of infection  $\eta_v^E$  in the force-of-infection term above,  
 reduced relative risk of hospitalisation for symptomatic infection  $\eta_v^H$  to be discussed below, and reduced relative  
 risk of transmission  $\eta_v^I$  in the force-of-infection term above (see Table S2). The waning transition rate, denoted  
 $k_{\bullet}^{13,\bullet}$  in the system of ODEs above, is written as

$$k_{\bullet}^{13,\bullet} = \frac{1}{T^r},$$

326 where  $T^r$  is the time from seroconversion to waning/loss of immunity to infection (see Table S2).

Given that vaccine-induced immunity to infection wanes but vaccine-induced immunity to severe disease does not, the hospitalisation and recovery transition rates must be defined carefully. The recovery transition rate for the asymptomatic infectious, denoted  $k^6$  in the system of ODEs above, is independent of vaccination but for completeness is defined here as

$$k^6 = \frac{1}{T^{I^a:R}},$$

where  $T^{I^a:R}$  is the infectious period for asymptomatic infection (see Table S1). The hospitalisation and recovery transition rates for the symptomatic infectious, denoted  $k_{j,v}^7(t)$  and  $k_{j,v}^8(t)$  in the system of ODEs above, are written as

$$k_{j,v}^7(t) = \frac{p_{j,v}^H(t)}{T_{j,v}^{I^s}(t)}$$

$$k_{j,v}^8(t) = \frac{1 - p_{j,v}^H(t)}{T_{j,v}^{I^s}(t)},$$

where  $p_{j,v}^H(t)$  is the time-dependent symptomatic infection hospitalisation ratio (SHR) and  $T_{j,v}^{I^s}(t) = T^{I^s:H}(p_{j,v}^H(t)) + T^{I^s:R}(1 - p_{j,v}^H(t))$  is the infectious period for symptomatic infection averaged across outcomes (see Table S1). Specifically, the SHR is written as

$$p_{j,v}^H(t) = \left( \frac{S_j^n(t) + \eta_v^E \eta_v^H (S_{j,v=0}(t) - S_j^n(t))}{S_{j,v=0}(t)} \right)^{\mathbb{1}_{\{v=0\}}} \eta_v^H \hat{p}_{g(j)}^H,$$

where  $\hat{p}_{g(j)}^H$  is the baseline SHR,  $\eta_v^H$  is the relative risk of hospitalisation for symptomatic infection mentioned above (see Table S2) and  $S_j^n(t)$  is an auxiliary health state representing the fully-naive susceptible (never infected nor vaccinated), which is the solution of the auxiliary equation  $\frac{dS_j^n}{dt} = - \left( k_{j,v}^1(t) + \sum_{u=v+1}^1 k_{j,v}^{11,c_u}(t) \right) S_j^n$ . This multiplier decays over time from an initial value of 1, when  $S_{j,v=0}(t) = S_j^n(t)$  (i.e., the entire population is fully-naive susceptible), and approaches a value of  $\eta_{v=1}^E \eta_{v=1}^H$  as vaccine-induced immunity to infection wanes, representing the retention of vaccine-induced immunity to severe disease. The baseline SHR is disease-dependent and is mapped from five-year age-bands to the model age-groups weighting by population, specifically

$$\hat{p}_g^H = \sum_{a \in g} \frac{\tilde{p}_a^{I^H R}}{p^{I^s}} \frac{\tilde{N}_a}{\sum_{a' \in g} \tilde{N}_{a'}}.$$

327 Therefore, the effectiveness of vaccination is fully endogenous to the local outbreak.

The vaccine efficacy parameters  $\eta_v^E$ ,  $\eta_v^H$ ,  $\eta_v^I$  and vaccine delay parameters  $T^c$ ,  $T^r$  are fixed (see Table S2), and it is assumed that these are independent of country-income-group archetype and disease. Factors such as the affordability of higher-efficacy vaccines for different countries are not considered (e.g., Covid-19 mRNA vaccines). However, the variability in vaccine administration and coverage parameters is modelled, reflecting the inequitable vaccine access, differences in immunisation infrastructure and logistics, and population willingness to vaccinate<sup>80</sup>. Data for these vaccination parameters were generated on a country-by-country basis as follows. The vaccine administration start-time  $T^{vax}$  and the vaccine administration rate  $a^{vax}$  (per capita) are determined by fitting a ramp function to Covid-19 vaccination data<sup>81</sup>, specifically the time series of fully-vaccinated individuals normalised by population. The start-time is defined in days from from 1<sup>st</sup> January 2020 and unlike previous delay parameters, it is not normalised by the doubling time, under the assumption that the delay is dominated by the disease-independent timescales of vaccine development and deployment rather than the timescales of disease detection. The administration rate is defined as the number of individuals completing a two-dose schedule per 100k population per day, consistent with the fact that only full and not partial vaccination is modelled. The vaccine coverage  $p^{vax}$  is extracted from the same data, defined as the maximum (and final) value attained, which is assumed to be disease-independent. As before, these country-level parameter data are stratified by income-group archetype and a set of candidate distributions are fitted with the `fitdist` package<sup>65</sup> using maximum likelihood estimation. The candidate distributions with lowest Akaike information criterion (AIC) values are identified, from which simulation parameters are drawn. The vaccination parameter marginal distributions are shown in Figure S2 in orange. The mean administration start-time is longest in LLMICs and shortest in HICs, while mean administration rate and coverage are lowest in LLMICs and highest in HICs, reflecting the income group inequities mentioned above. Since the administration rate is drawn per capita, it is multiplied by the local population before simulation. Illustrative values of population-level vaccination coverage for a sample of

synthetic countries in each income-group archetype, as a function of time since the outbreak, are shown in Figure S4. Finally, for all diseases except for Influenza-1918-X, vaccine prioritisation follows an age-descending order with reversal permutation function

$$\pi = \begin{pmatrix} 1 & 2 & 3 & 4 \\ 4 & 3 & 2 & 1 \end{pmatrix},$$

whereas for Influenza-1918-X the working-age group is prioritised above the retired-age group due to the comparable IFR in both age-groups (see Table S1), with permutation function

$$\pi = \begin{pmatrix} 1 & 2 & 3 & 4 \\ 3 & 4 & 2 & 1 \end{pmatrix}.$$

328 Of course, vaccine prioritisation is inherently an optimisation problem in its own right and will depend on  
 329 country- and disease-specific factors<sup>82</sup>; however, this is not the objective of the current study.

| Parameter                                                  | Symbol         | Value           |
|------------------------------------------------------------|----------------|-----------------|
| Time from Vaccination to Seroconversion                    | $T^c$          | 21<br>Assumed   |
| Relative Risk of Infection                                 | $\eta_{v=1}^E$ | 0.30<br>Assumed |
| Relative Risk of Hospitalisation for Symptomatic Infection | $\eta_{v=1}^H$ | 0.33<br>Assumed |
| Relative Risk of Transmission                              | $\eta_{v=1}^I$ | 0.70<br>Assumed |
| Time from Seroconversion to Waning                         | $T^r$          | 365<br>Assumed  |

**Table S2:** Vaccine parameter values. Delays are reported in days. The relative risks correspond to vaccine efficacies of 70% against infection, 90% against hospitalisation/severe disease (complement of the product of the relative risk of infection and the relative risk of hospitalisation for symptomatic infection) and 30% against onward transmission. The corresponding relative risks for the unvaccinated are  $\eta_{v=0}^E = \eta_{v=0}^H = \eta_{v=0}^I = 1$ . Waning refers to the loss of vaccine-induced immunity to infection but not severe disease.

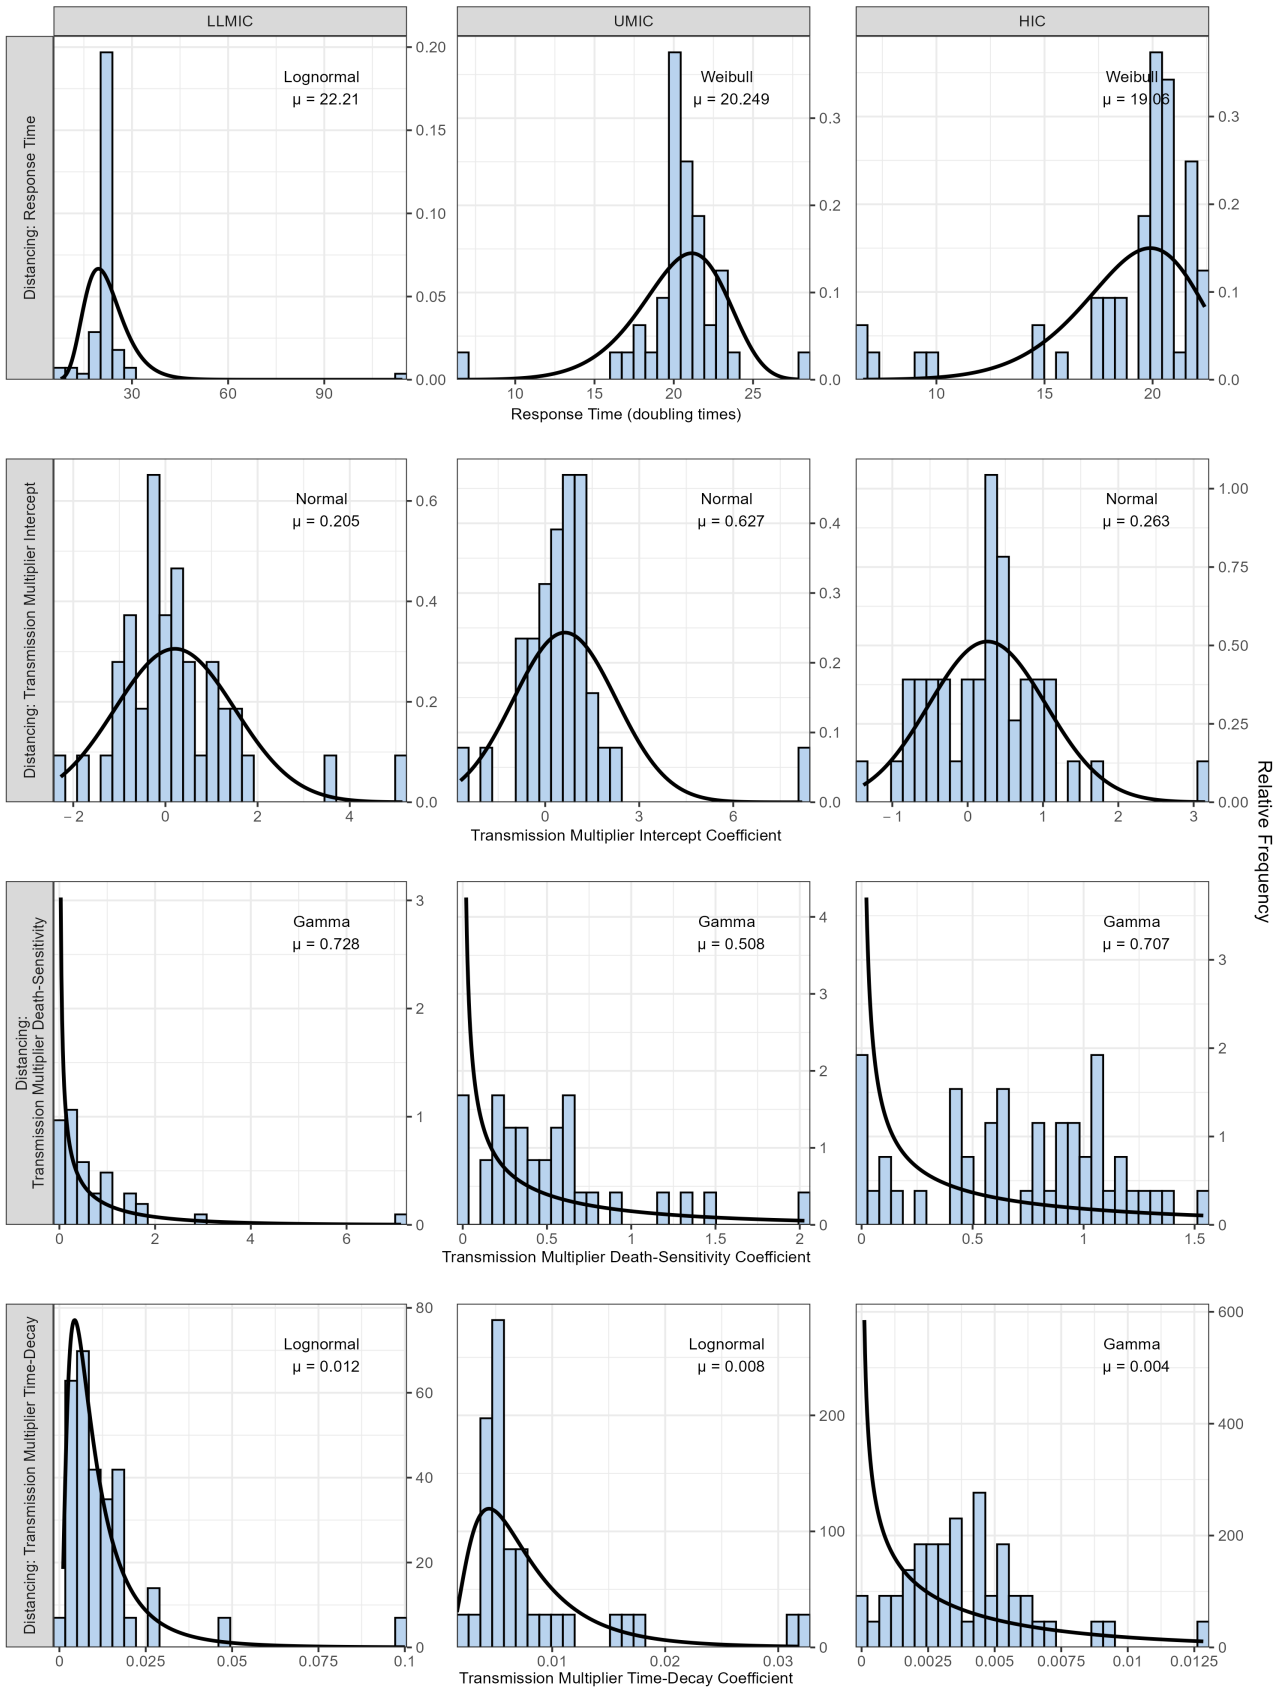

Figure S2: Continued on next page ...

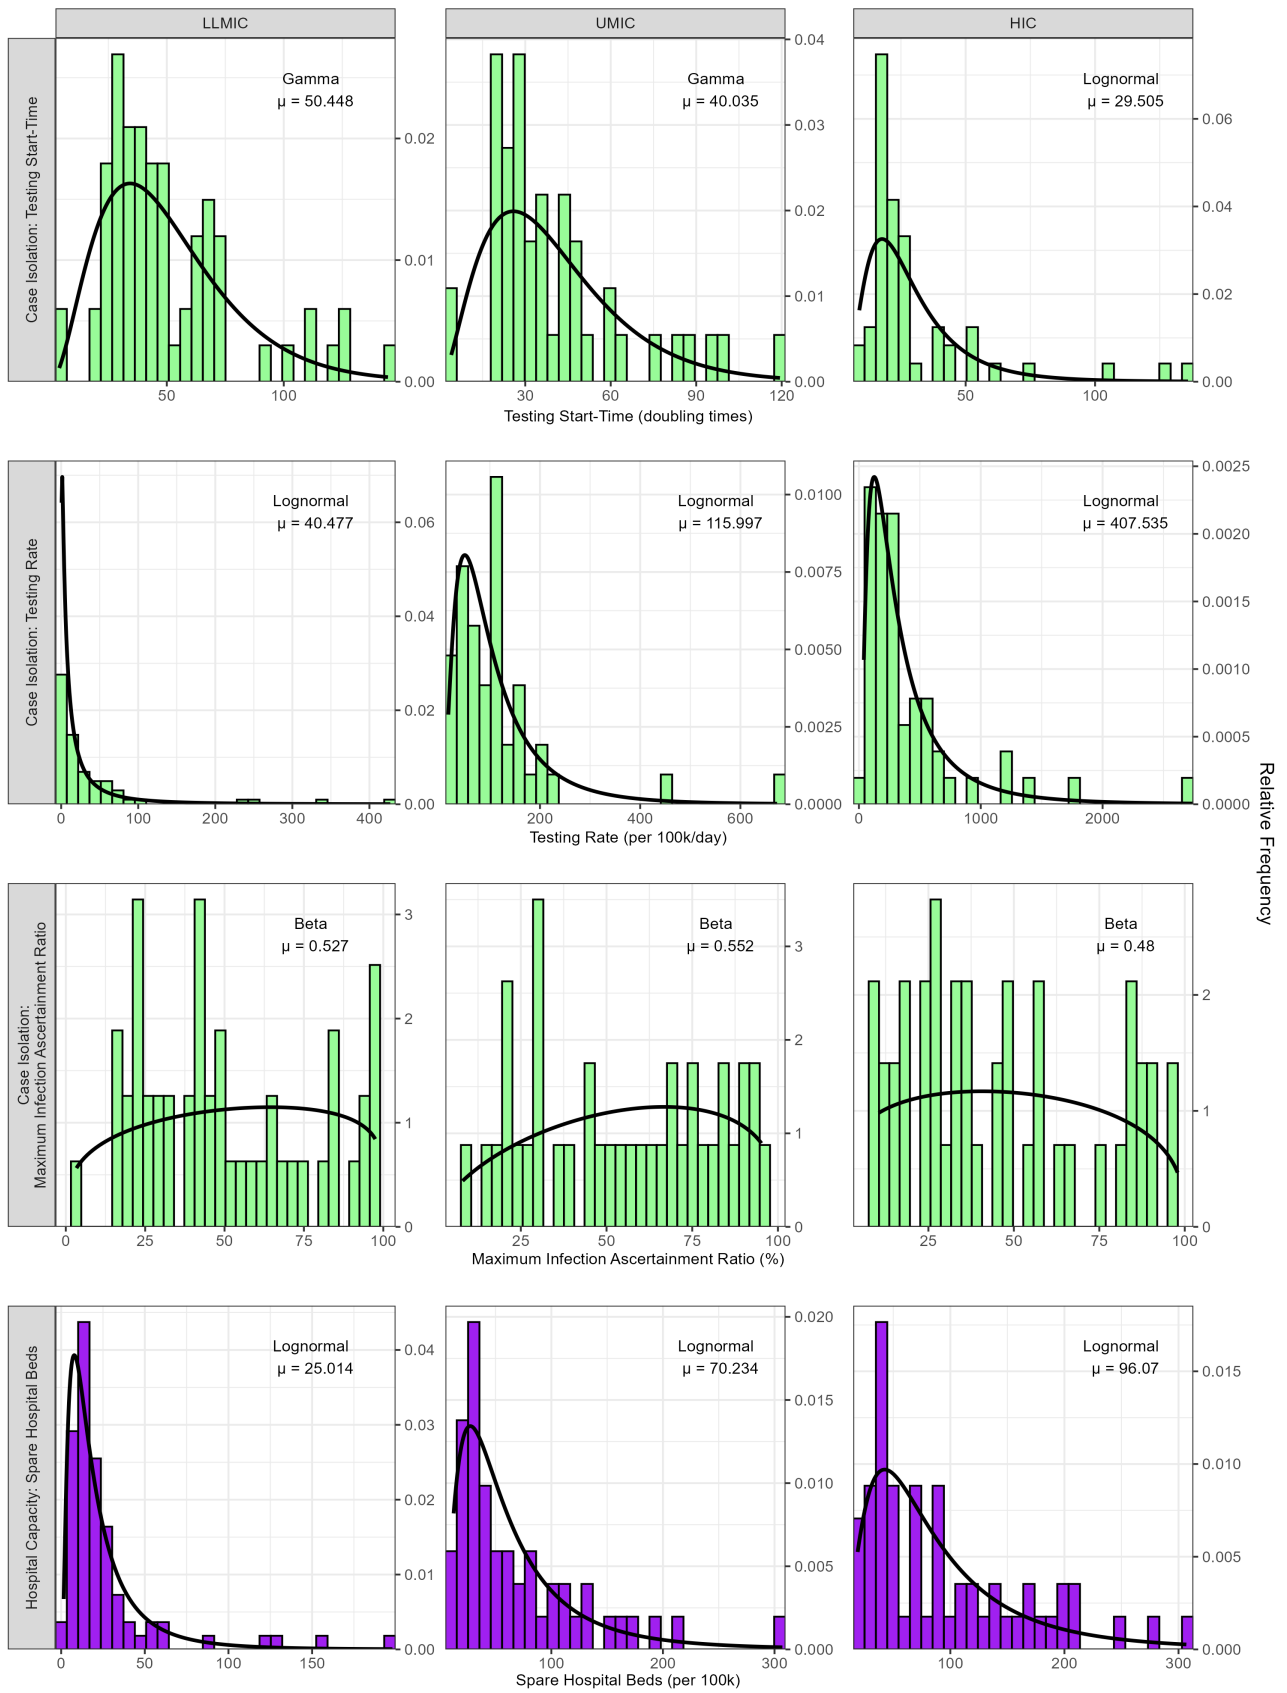

Figure S2: Continued on next page ...

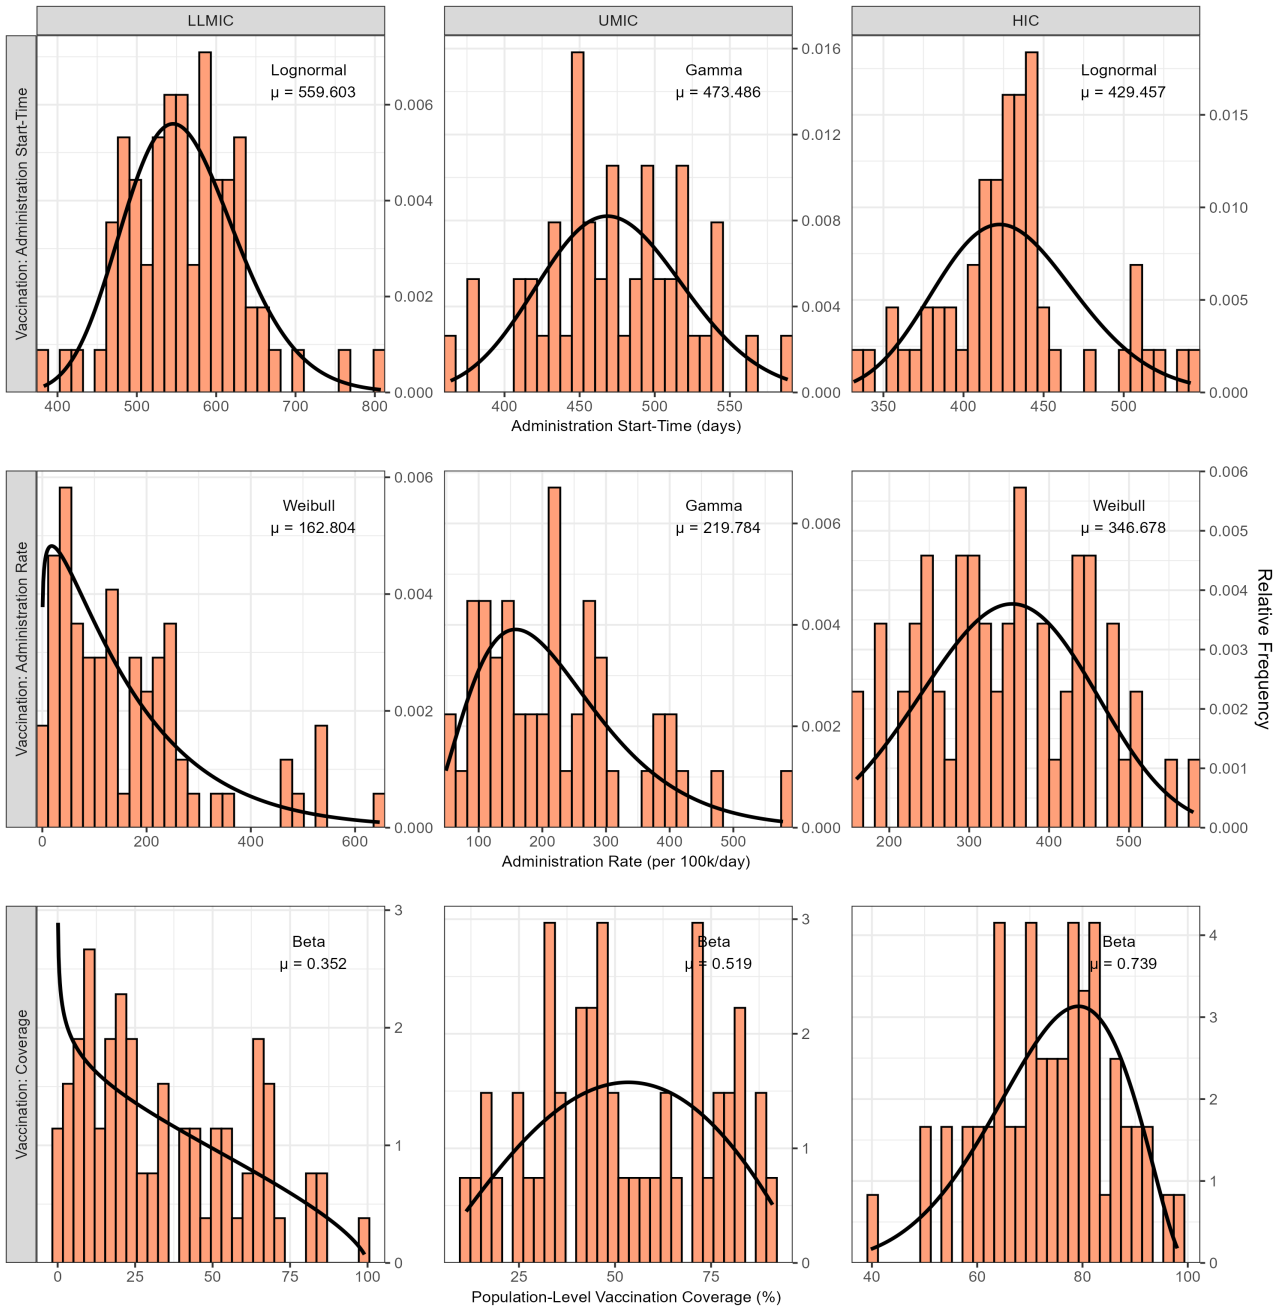

**Figure S2:** Mitigation measure data and fitted marginal distributions by country-income-group archetype. The mitigation measures are distancing, case isolation, hospital capacity and vaccination (colours), each with underlying parameters. The fitted marginal distribution is that with lowest AIC among a set of candidate distributions, and the resulting distribution type and its mean are displayed in each panel.

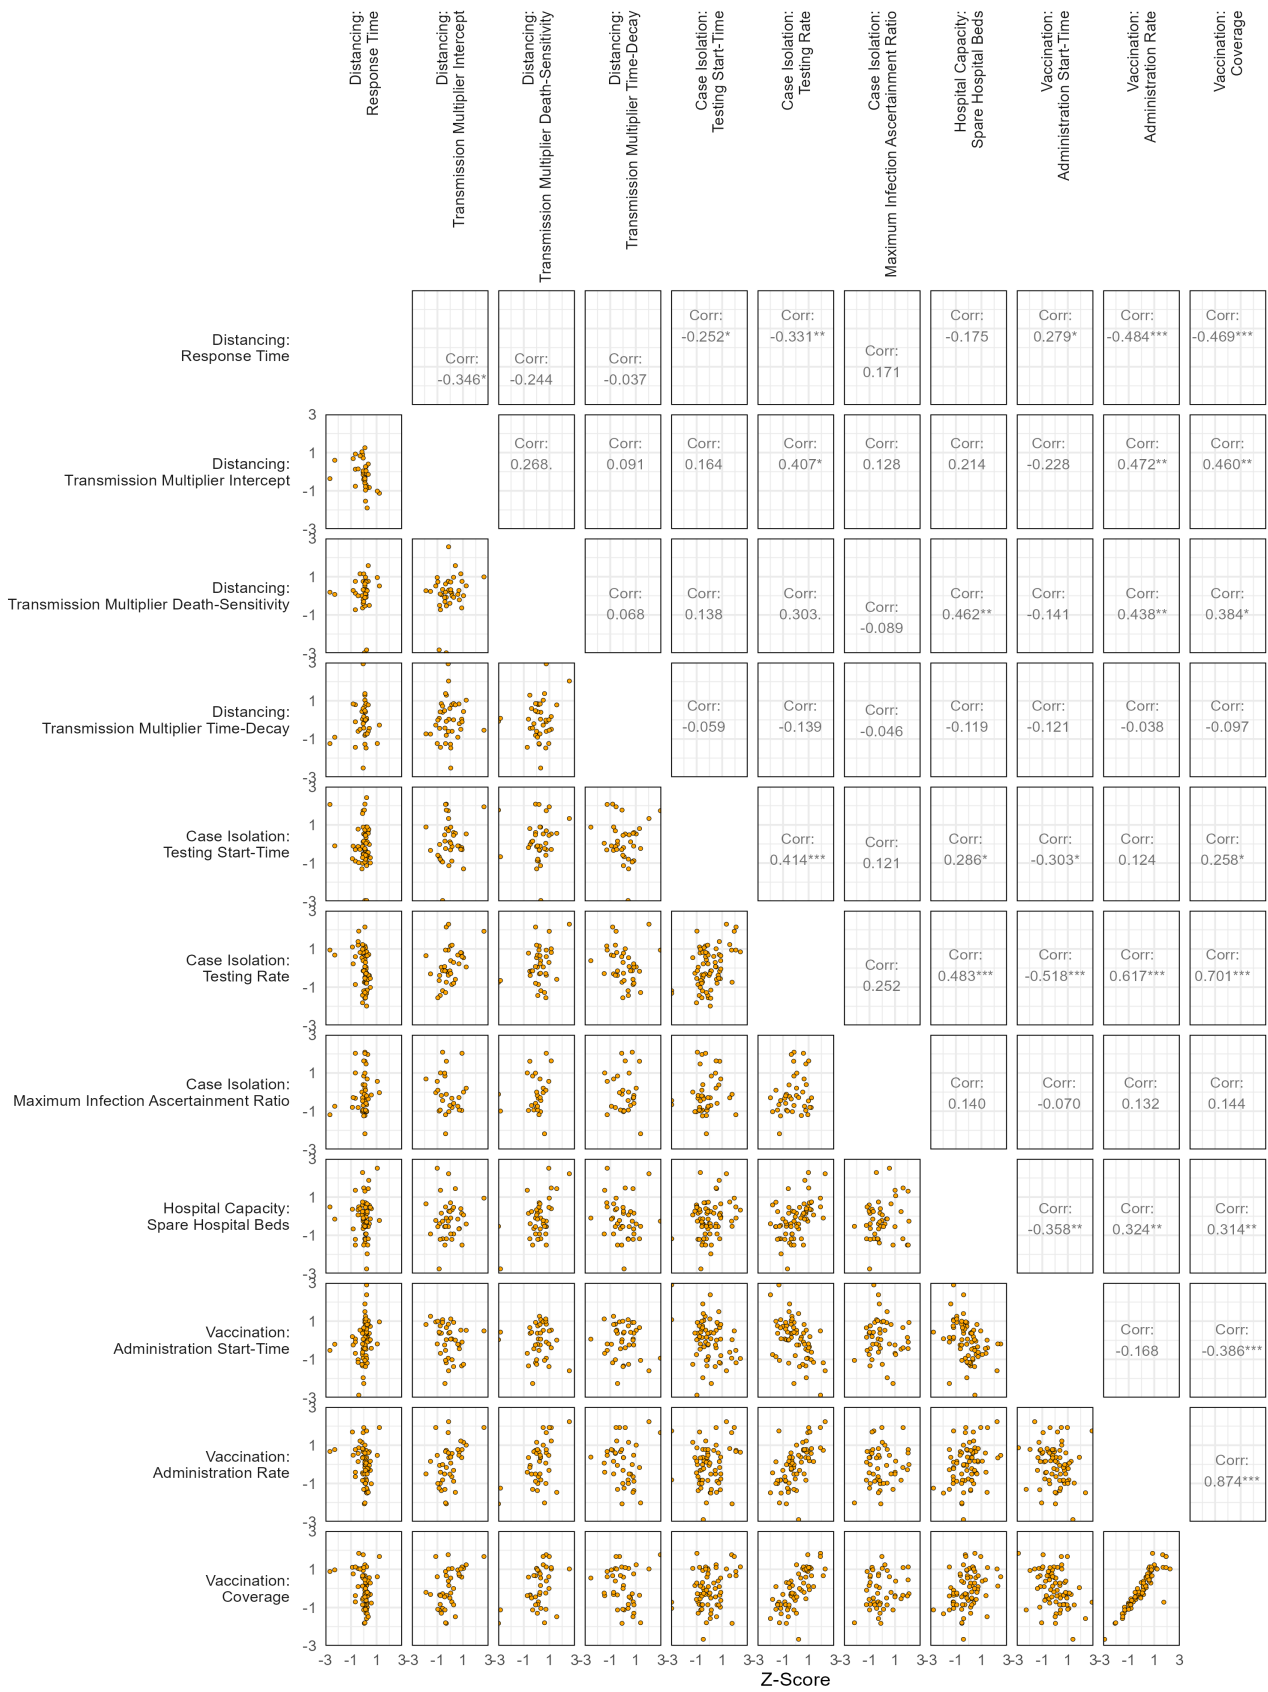

Figure S3: Continued on next page ...

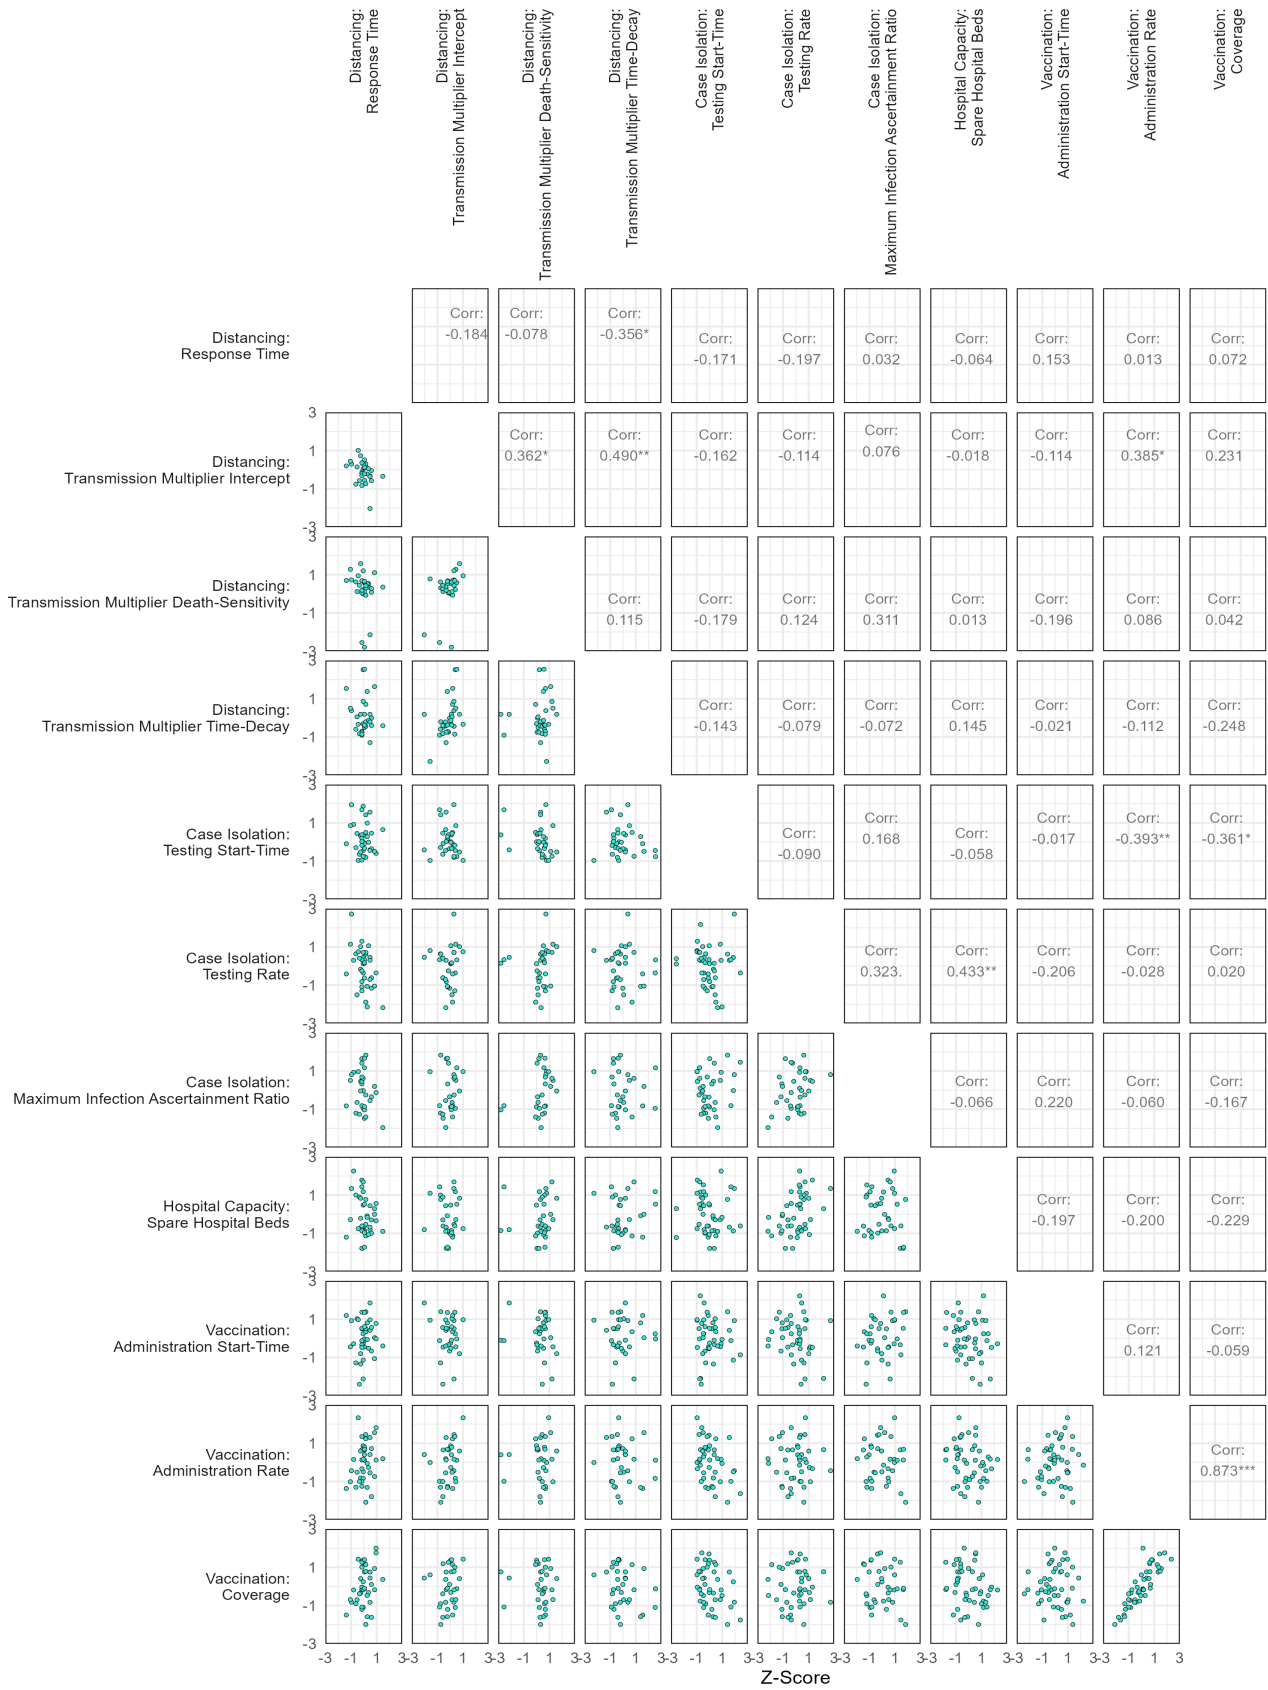

Figure S3: Continued on next page ...

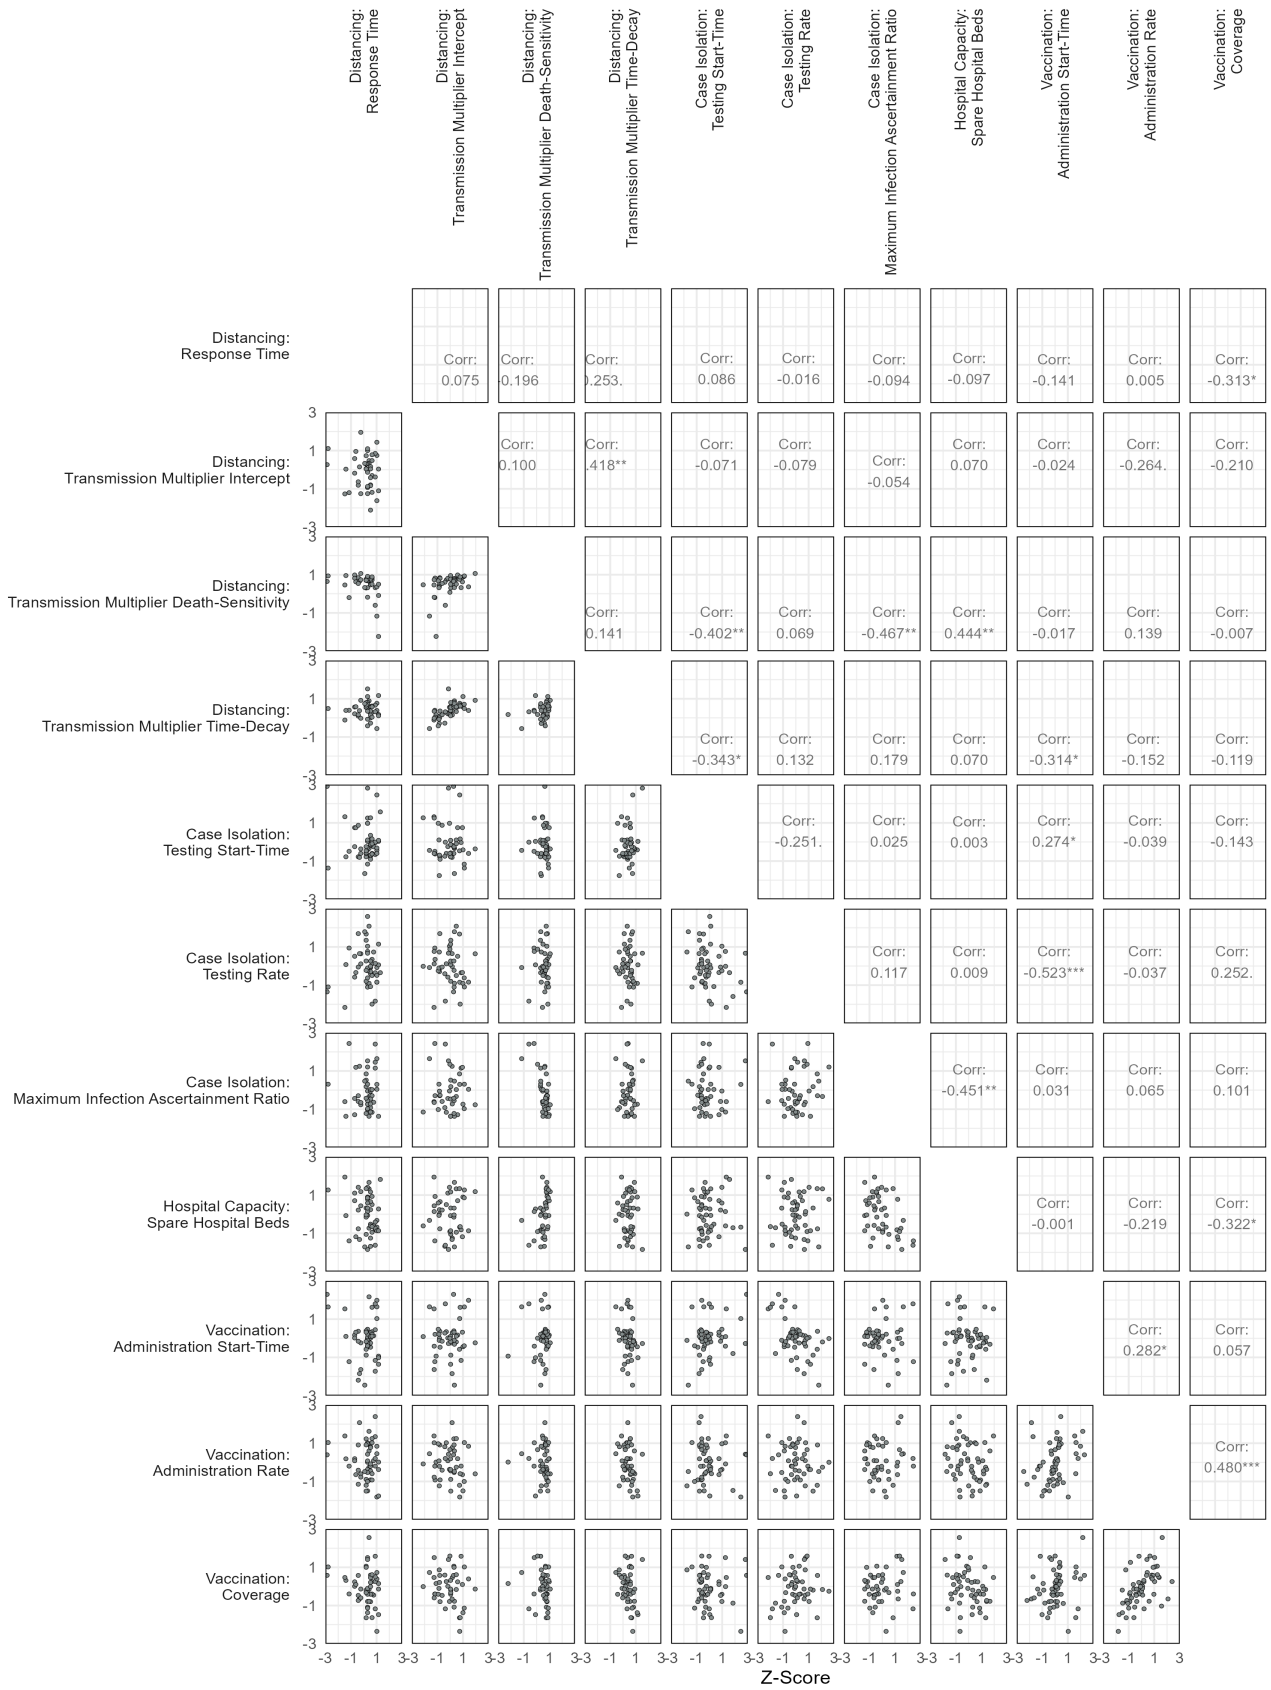

**Figure S3:** Pairwise z-score scatterplots and associated correlation coefficients of mitigation measure data by country-income-group archetype. The z-scores are calculated for the observed data using the fitted marginal distributions in Figure S2 above, for each income-group archetype (colours).

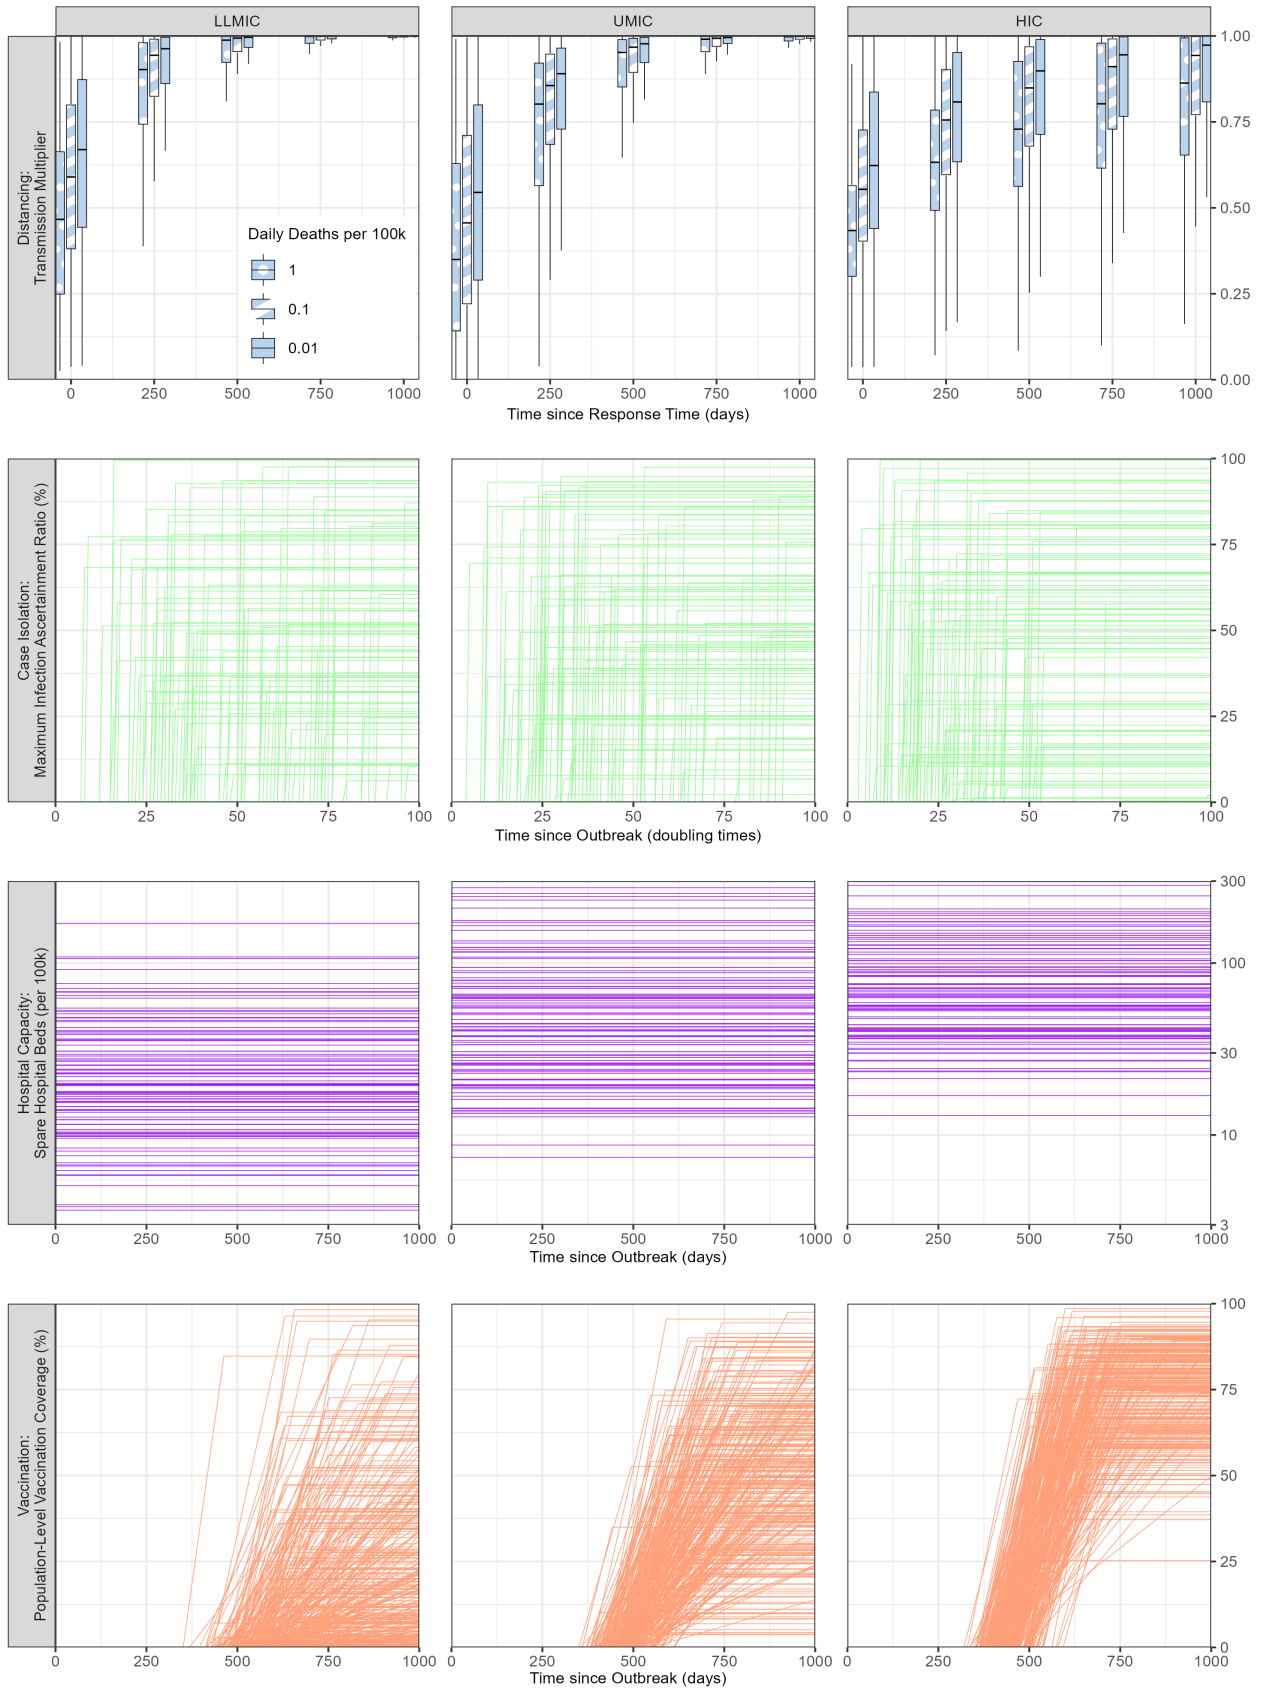

**Figure S4:** Mitigation measure implementation, as a function of time, for sample synthetic countries by country-income-group archetype. The mitigation measures (colours) are distancing via a time- and death-dependent transmission multiplier (parametrised by the response time, intercept coefficient, death-sensitivity coefficient and time-decay coefficient), case isolation via a time- and prevalence-dependent infection ascertainment ratio (parametrised by the testing start-time, testing rate and maximum infection ascertainment ratio), hospital capacity via time-independent spare hospital beds, and vaccination via the time-dependent rollout of vaccines (parametrised by administration start-time, rate and population-level coverage).

## 330 2.4 Closure Strategies

331 For more transmissible and/or severe disease outbreaks, the imposition of the aforementioned mitigation mea-  
332 sures may not yield adequate control. As illustrated by the Covid-19 pandemic, the mandated closure of  
333 businesses and schools may be required in addition to distancing and case isolation in order to hold hospital  
334 occupancy below capacity, especially prior to vaccine availability<sup>83</sup>. In the daedalus model, it is assumed that  
335 decision-makers have the ability to mandate the partial- or full-closure of any sector of the economy and the  
336 extent to which economic sector  $j$  is open at time  $t$  is denoted  $x_j(t)$ , where the closure of the education sector  
337  $x_{edu}(t) = x_{41}(t)$  also corresponds to school closure. Home-working may also be mandated and the proportion  
338 of workers home-working is denoted  $q_j(t)$ . The purpose of sector closures is to reduce transmission, driven  
339 by decreased mixing in workplaces, schools and other-locations encoded in the contact matrices (see section  
340 2.1), where the proportional closure of a sector is assumed to be equal to the proportional reduction in the  
341 workforce of that sector and a corresponding reduction in contacts. However, sector closures also incur both  
342 short- and long-term losses (see section 2.5), the magnitude of which depends on closure extent and timing.  
343 Indeed, the daedalus model was originally developed to project the health and economic impacts of different  
344 sector closure policies for Covid-19 in the UK, in order to quantify the lives vs. livelihoods trade-off, and to  
345 identify GDP-maximising policies subject to hospital occupancy constraints in particular<sup>15</sup>.

346 Here, pre-defined dynamic closure strategies are modelled instead of an optimisation-based approach. Four  
347 distinct closure strategies may be pursued in response to a disease outbreak in a synthetic country, inspired by  
348 strategies implemented during the Covid-19 pandemic<sup>84</sup>. Namely, the set of closure strategies comprises:

- 349 • Elimination, inspired by ‘aggressive containment’ Covid-zero strategies, e.g. New Zealand<sup>85</sup>, Singapore<sup>86</sup>
- 350 • Reactive-Business/Reactive-School Closures, inspired by ‘suppression’ reactive business/school closure  
351 strategies, e.g. EU countries<sup>87</sup>, UK<sup>88</sup>
- 352 • Reactive-Business/Sustained-School Closures, inspired by ‘suppression’ reactive business closure strategies  
353 with long-term school closures, e.g. Bangladesh<sup>89</sup>, Philippines<sup>90</sup>
- 354 • No Closures, inspired by ‘mitigation’ herd-immunity strategies, e.g. Zambia<sup>91</sup>,

355 which range from laissez-faire to very stringent. Each strategy is defined in detail below but broadly speaking, the  
356 Elimination strategy alternates between heavy and light sector closures in response to the effective reproduction  
357 number, the Reactive-Business/Reactive-School Closures strategy alternates between heavy and light sector  
358 closures in response to hospital occupancy, the Reactive-Business/Sustained-School Closures strategy alternates  
359 between heavy and light sector closures in response to hospital occupancy but keeps the education sector  
360 and schools closed for the duration of the outbreak, and the No Closures strategy refrains from any sector  
361 closures. The distancing, case isolation, hospital capacity and vaccination mitigation measures described above  
362 are imposed irrespective of the strategy pursued, hence no entirely unmitigated scenario is considered. Each  
363 closure strategy is defined as a set of discrete economic configurations and specific rules for switching between  
364 them. Here, an economic configuration is a vector that defines the extent to which the entire economy (including  
365 the education sector and schools) is open at a given time, expressed as a proportion; for example, the fully-open  
366 configuration  $x_j(t) = 1$ . The set of economic configurations for each strategy are displayed in Table S3 and the  
367 associated reductions in transmission is shown in Figure S5 for each disease and country-income-group archetype  
368 (excluding distancing). The rules for switching between configurations are also strategy-dependent and these  
369 are described in detail below; examples include reaching the response time  $T^{res}$ , hospital occupancy  $H^{tot}(t)$   
370 nearing hospital capacity  $H^{max}$ , the value of the effective reproduction number  $R_t$ , and reaching the vaccine  
371 administration end-time  $T_5^{vax}$ . Critically, the closure strategies are dynamic, since configuration switching  
372 is model-endogenous and depends on both the epidemiological model health states (see section 2.2) and the  
373 mitigation measure parameters (see Figure S2), which in turn depend on disease epidemiological parameters  
374 (see Table S1) and income-group-dependent synthetic country characteristics (see Figure S1). As a result, for  
375 each strategy, the extent of sector closures is fixed as per the economic configurations, but the timing will vary  
376 in terms of occurrence, duration and frequency.

377 Every closure strategy begins (and ends) with the fully-open configuration  $x_j(t) = 1$  and no mandated home-  
378 working  $q_j(t) = 0$ . This continues until the response time is reached, at which point distancing takes effect (see  
379 section 2.3) and the strategies diverge. Whether sector closures are imposed at the response time depends on the  
380 strategy and the strategy-specific switching rules (see subsequent paragraphs). Irrespective of the strategy, it  
381 is assumed that any imposed closures coincide with mandated home-working (note that home-working without  
382 closures is not modelled due to conflicting evidence regarding the associated productivity losses/gains<sup>92</sup>), where

383 the proportion of workers capable of home-working depends on the income-group archetype and economic sector  
384 (see Figure S1). Furthermore, during periods with the heavy-closure configuration (which may be imposed under  
385 any strategy except for No Closures - see Table S3), the distancing transmission multiplier is restricted from  
386 exceeding its value at the time of imposition of heavy closures, i.e. no decay of distancing (due to factors such as  
387 reduced adherence and pandemic fatigue) is modelled during periods of heavy closures. The penultimate rule for  
388 lifting all sector closures and mandated home-working (as well as case isolation - see section 2.3) and switching  
389 back to the fully-open configuration is also strategy-independent, and is defined to be the first occurrence of  
390 any of three events: the effective reproduction number is subcritical without any closures, home-working or  
391 case isolation; reaching the vaccine administration end-time; or 2.5 years after the response time. Though the  
392 switching rule is strategy-independent, the time of occurrence, denoted  $T^{open}$ , is strategy-dependent. Likewise,  
393 the strategy-independent rule for ending the simulation following  $T^{open}$  is reaching the post-outbreak disease-free  
394 equilibrium with hospital occupancy lower than one per million population and subcritical effective reproduction  
395 number, simultaneously, and the time of occurrence is denoted  $T^{end}$ . The strategy-specific switching rules are  
396 described in the following paragraphs.

### 397 No Closures

398 Under the No Closures strategy, the first switching rule is reaching the response time (as for all closure strategies),  
399 at which point distancing takes effect via the aforementioned transmission multiplier (see section 2.3) and  
400 illustrative transmission-reduction values are shown in Figure S4, as a function of daily deaths and time since the  
401 response time. No mandated sector closures or home-working are ever imposed and the fully-open configuration  
402 is maintained throughout, regardless of epidemiology, i.e.  $x_j(t) = 1$  and  $q_j(t) = 0 \forall j, t$ . As well as distancing,  
403 the case isolation, hospital capacity and vaccination mitigation measures are modelled in the same manner  
404 as for the other strategies, hence it is not identical to an entirely unmitigated outbreak. However, this will  
405 depend on the values of the mitigation measure parameters drawn (see Figure S2): if the parameter values are  
406 unfavourable (e.g., little distancing, low ascertainment, few spare hospital beds, slow vaccination), then the No  
407 Closures strategy may be similar to an ‘approximately’ unmitigated outbreak<sup>91</sup>, but if the parameter values are  
408 favourable, then it may be similar to the successful implementation of a Covid-19 ‘mitigation’ strategy. Case  
409 isolation ceases upon reaching  $T^{open}$ .

### 410 Reactive-Business/Sustained-School Closures

411 Under the Reactive-Business/Sustained-School Closures strategy, the first switching rule is reaching the response  
412 time, at which point distancing takes effect but the fully-open configuration is maintained (initially) according to  
413 a ‘wait-and-see’ approach. The second rule for switching to the heavy-closure configuration is defined to be hos-  
414 pital occupancy nearing hospital capacity; specifically, the event  $H^{tot}(t) = 0.95H^{max}$  (i.e., occupancy reaching  
415 a fixed threshold of 95% of capacity) is used if the instantaneous occupancy growth rate ( $r(t) = \dot{H}^{tot}(t)/H^{tot}(t)$ )  
416 is low (less than 0.025 - determined empirically), but the event  $H^{tot}(t) = \exp\left(-r \frac{T^{E:I} + T^{I^S:H}}{2}\right) H^{max}$  (i.e., oc-  
417 cupancy reaching a dynamic threshold that depends on the occupancy growth rate and time from exposure to  
418 hospital-admission) is used otherwise, in order to prevent large capacity breaches. However, if neither event oc-  
419 curs, sector closures will not be triggered, for example, for less transmissible and/or severe diseases or if the spare  
420 hospital capacity is large. In this case, the fully-open configuration is maintained throughout and the Reactive-  
421 Business/Sustained-School Closures strategy is indistinguishable from the No Closures strategy - this situation  
422 is termed ‘Untriggered Closures’. Otherwise, if either event occurs, there is a switch to the heavy-closure config-  
423 uration (see Table S3), which includes school closure. The third rule is for switching from the heavy-closure to  
424 the light-closure configuration, if there is a sufficient reduction in transmission, and it is defined to be hospital  
425 occupancy falling to the fixed threshold of 25% of capacity,  $H^{tot}(t) = 0.25H^{max}$ . The light-closure configuration  
426 involves broadly less-stringent sector closures for businesses, but school closures are sustained, replicating the  
427 long-term school closures observed in several middle-income countries during the Covid-19 pandemic<sup>89,90</sup>. The  
428 relative reductions in  $R_0$  for both heavy- and light-closure configurations are shown in Figure S5, where it is  
429 apparent that there is less of a difference in transmission between the two configurations when compared to  
430 other closure strategies due to the sustenance of school closures. The strategy alternates between the light- and  
431 heavy-closure configurations depending on hospital occupancy via the aforementioned switching rules, until all  
432 mandated sector closures and home-working are lifted, and case isolation ceases, at  $T^{open}$ .

## 433 Reactive-Business/Reactive-School Closures

434 Under the Reactive-Business/Reactive-School Closures strategy, the switching rules are identical to the Reactive-  
435 Business/Sustained-School Closures strategy: distancing takes effect at the response time albeit with the fully-  
436 open configuration, the heavy-closure configuration is imposed if hospital occupancy nears hospital capacity  
437 as per the same event definitions, and the light-closure configuration is imposed subsequently conditional on a  
438 sufficient reduction in occupancy, as above. However, the difference between the Reactive-Business/Reactive-  
439 School and Reactive-Business/Sustained-School Closures strategies is the economic configurations employed  
440 (see Table S3). In particular, the heavy-closure configuration involves broadly more-stringent sector closures  
441 for businesses compared to the heavy-closure configuration for the Reactive-Business/Sustained-School Closures  
442 strategy, with the same level of school closure, but the light-closure configuration allows schools to reopen unlike  
443 the light-closure configuration for the Reactive-Business/Sustained-School Closures strategy. Accordingly, the  
444 relative reductions in  $R_0$  in Figure S5 are more different between the heavy- and light-closure configurations, and  
445 flank the distributions of both the heavy- and light-closure configurations of the Reactive-Business/Sustained-  
446 School Closures strategy above. Therefore, the strategy alternates between light- and heavy- simultaneous  
447 school- and business-closures depending on hospital occupancy, replicating the reactive suppression strategies  
448 observed during the Covid-19 pandemic<sup>87,88</sup>, until all mandated sector closures and home-working are lifted,  
449 and case isolation ceases, at  $T^{open}$ .

## 450 Elimination

451 Under the Elimination strategy, the first switching rule is reaching the response time with the activation of  
452 distancing, as for the other strategies, but now the heavy-closure configuration is imposed immediately. Here,  
453 the heavy-closure configuration is identical to that of the Reactive-Business/Reactive-School Closures strategy,  
454 with stringent sector closures of both businesses and schools, with the aim of reducing prevalence to the extent  
455 that case isolation substitutes the need for stringent business and school closures. Since the IARs increase in the  
456 high-ascertainment régime at low prevalence, this substitution is possible even for more transmissible diseases  
457 provided that there is a sufficiently high level of ascertainment and isolation effectiveness (see section 2.3),  
458 and if the reduction in transmission under the heavy-closures configuration is sufficient to cross the prevalence  
459 threshold. The second rule for switching to the light-closure configuration is if the effective reproduction  
460 number conditional on switching to the light-closure configuration is subcritical, i.e.  $R_t(M(x_{j,\text{light}}, q_j)) < 1$ ,  
461 for total contact matrix  $M(x_j(t), q_j(t))$ , light-closure configuration  $x_{j,\text{light}}$  and the proportion of workers home-  
462 working  $q_j$  (see section 2.1). The light-closure configuration involves broadly less-stringent sector closures  
463 for businesses compared to the light-closure configuration for either the Reactive-Business/Sustained-School  
464 or Reactive-Business/Reactive-School Closures strategies, and also allows schools to reopen (see Table S3),  
465 replicating the Covid-zero strategies that allowed for an open domestic economy when successful<sup>85,86</sup>. The  
466 relative reduction in  $R_0$  for the light-closure configuration in the high-ascertainment régime of case isolation is  
467 shown in Figure S5, accounting for the variability in isolation effectiveness between diseases and ascertainment  
468 between income groups. The third rule is for switching back to the heavy-closure configuration if there is  
469 an increase in transmission that threatens containment, defined to be an instantaneous effective reproduction  
470 number  $R_t > 1.2$ , for example due to the waning of vaccine-induced immunity to infection. The strategy  
471 alternates between the light- and heavy-closure configurations depending on the conditional and instantaneous  
472 effective reproduction numbers via the aforementioned switching rules until all mandated sector closures and  
473 home-working are lifted, and case isolation ceases, at  $T^{open}$ . Since this is an elimination strategy and not an  
474 eradication strategy<sup>93</sup>, it is possible that there is an ‘exit wave’ after  $T^{open}$ , depending on the vaccine rollout  
475 and the vaccination parameters drawn.

476 Each closure strategy - its economic configurations and switching rules - is implemented in the same manner for  
477 each synthetic country within each income-group archetype. However, the reduction in transmission under a  
478 given economic configuration depends on several underlying parameters, including the number of workers in each  
479 economic sector, the magnitude of workplace contacts and the proportion of workers capable of home-working  
480 (see Figure S1). The rules for switching between configurations are also inherently linked to the mitigation  
481 measure parameters, including the response time, maximum infection ascertainment ratio, spare hospital beds,  
482 and vaccination administration start-time and rate (see Figure S2). Therefore, it is expected that any systematic  
483 differences in parameters between different income-group archetypes as seen in Figures S1 and S2, will manifest  
484 in terms of the occurrence, duration and frequency of sector closures, and the associated short- and long-term  
485 losses (see section 2.5). A realisation of each closure strategy is plotted in Figure S6.

486 The economic configurations for every closure strategy are shown in Table S3, the values of which were calculated

487 based on the ratio of GVA observed during the Covid-19 pandemic to the corresponding pre-pandemic values  
488 by economic sector, where data for the Reactive-Business/Sustained-School Closures strategy were obtained  
489 from Indonesia<sup>94</sup>, data for the Reactive-Business/Reactive-School Closures strategy from the UK<sup>95</sup> and data  
490 for the Elimination strategy from the UK<sup>95</sup> and Australia<sup>96</sup> for the heavy and light configurations respectively.  
491 The dichotomous values for the education sector (0.10 or 1) are assumed to correspond to school closure and  
492 openness respectively, rather than calculated from GVA data. Home-working data were generated on a country-  
493 by-country basis: UK data on the proportion of workers home-working by sector were sourced from the ONS<sup>97</sup>  
494 and mapped to different countries, using country-level estimates of the total proportion of the workforce home-  
495 working<sup>98</sup> combined with the aforementioned workforce data from the OECD<sup>26</sup> and the ILO<sup>27</sup>.

| Economic Sector                                                           | No Closures | Reactive-Business/<br>Sustained-School<br>Closures |       | Reactive-Business/<br>Reactive-School<br>Closures |       | Elimination |       |
|---------------------------------------------------------------------------|-------------|----------------------------------------------------|-------|---------------------------------------------------|-------|-------------|-------|
|                                                                           |             | Heavy                                              | Light | Heavy                                             | Light | Heavy       | Light |
| 1: Agriculture, Hunting, Forestry                                         | 1           | 1                                                  | 1     | 0.86                                              | 0.88  | 0.86        | 1     |
| 2: Fishing and Aquaculture                                                | 1           | 1                                                  | 1     | 0.86                                              | 0.88  | 0.86        | 1     |
| 3: Mining and Quarrying, Energy Producing Products                        | 1           | 0.67                                               | 0.79  | 0.90                                              | 0.91  | 0.90        | 1     |
| 4: Mining and Quarrying, Non-Energy Producing Products                    | 1           | 1                                                  | 1     | 0.90                                              | 0.91  | 0.90        | 1     |
| 5: Mining Support Service Activities                                      | 1           | 1                                                  | 1     | 0.90                                              | 0.91  | 0.90        | 1     |
| 6: Food Products, Beverages and Tobacco                                   | 1           | 1                                                  | 1     | 0.70                                              | 0.94  | 0.70        | 1     |
| 7: Textiles, Textile Products, Leather and Footwear                       | 1           | 0.89                                               | 0.92  | 0.70                                              | 0.94  | 0.70        | 0.98  |
| 8: Wood and Products of Wood and Cork                                     | 1           | 1                                                  | 0.95  | 0.70                                              | 0.94  | 0.70        | 0.98  |
| 9: Paper Products and Printing                                            | 1           | 1                                                  | 0.98  | 0.70                                              | 0.94  | 0.70        | 0.98  |
| 10: Coke and Refined Petroleum Products                                   | 1           | 0.87                                               | 0.88  | 0.70                                              | 0.94  | 0.70        | 0.88  |
| 11: Chemical and Chemical Products                                        | 1           | 1                                                  | 1     | 0.70                                              | 0.94  | 0.70        | 0.88  |
| 12: Pharmaceuticals, Medicinal Chemical and Botanical Products            | 1           | 1                                                  | 1     | 0.70                                              | 0.94  | 0.70        | 0.88  |
| 13: Rubber and Plastics Products                                          | 1           | 0.87                                               | 1     | 0.70                                              | 0.94  | 0.70        | 0.88  |
| 14: Other Non-Metallic Mineral Products                                   | 1           | 0.92                                               | 0.89  | 0.70                                              | 0.94  | 0.70        | 0.88  |
| 15: Basic Metals                                                          | 1           | 1                                                  | 1     | 0.70                                              | 0.94  | 0.70        | 1     |
| 16: Fabricated Metal Products                                             | 1           | 0.90                                               | 1     | 0.70                                              | 0.94  | 0.70        | 1     |
| 17: Computer, Electronic and Optical Equipment                            | 1           | 0.90                                               | 1     | 0.70                                              | 0.94  | 0.70        | 1     |
| 18: Electrical Equipment                                                  | 1           | 0.90                                               | 1     | 0.70                                              | 0.94  | 0.70        | 1     |
| 19: Machinery and Equipment, NEC                                          | 1           | 0.89                                               | 0.95  | 0.70                                              | 0.94  | 0.70        | 1     |
| 20: Motor Vehicles, Trailers and Semi-Trailers                            | 1           | 0.66                                               | 0.82  | 0.70                                              | 0.94  | 0.70        | 1     |
| 21: Other Transport Equipment                                             | 1           | 0.66                                               | 0.82  | 0.70                                              | 0.94  | 0.70        | 1     |
| 22: Manufacturing NEC; Repair and Installation of Machinery and Equipment | 1           | 0.98                                               | 1     | 0.70                                              | 0.94  | 0.70        | 0.98  |
| 23: Electricity, Gas, Steam and Air Conditioning Supply                   | 1           | 0.94                                               | 0.94  | 0.89                                              | 1     | 0.89        | 0.97  |
| 24: Water Supply, Sewerage, Waste Management and Remediation Activities   | 1           | 1                                                  | 1     | 0.92                                              | 0.98  | 0.92        | 0.97  |

continued on next page

continued from previous page

| <b>Economic Sector</b>                                                                                                         | <i>No Closures</i> | <i>Reactive-Business/<br/>Sustained-School<br/>Closures</i> |                                | <i>Reactive-Business/<br/>Reactive-School<br/>Closures</i> |                                | <i>Elimination</i>             |                                |
|--------------------------------------------------------------------------------------------------------------------------------|--------------------|-------------------------------------------------------------|--------------------------------|------------------------------------------------------------|--------------------------------|--------------------------------|--------------------------------|
| 25: Construction                                                                                                               | 1                  | 0.95                                                        | 0.95                           | 0.56                                                       | 0.92                           | 0.56                           | 0.94                           |
| 26: Wholesale and Retail Trade, Repair of Motor Vehicles                                                                       | 1                  | 0.92                                                        | 0.97                           | 0.65                                                       | 1                              | 0.65                           | 1                              |
| 27: Land Transport and Transport via Pipelines                                                                                 | 1                  | 0.83                                                        | 1                              | 0.63                                                       | 0.82                           | 0.63                           | 1                              |
| 28: Water Transport                                                                                                            | 1                  | 0.81                                                        | 0.98                           | 0.63                                                       | 0.82                           | 0.63                           | 1                              |
| 29: Air Transport                                                                                                              | 1                  | 0.16                                                        | 0.42                           | 0.63                                                       | 0.82                           | 0.63                           | 0.18                           |
| 30: Warehousing and Support Activities for Transportation                                                                      | 1                  | 0.64                                                        | 0.91                           | 0.63                                                       | 0.82                           | 0.63                           | 0.91                           |
| 31: Postal and Courier Activities                                                                                              | 1                  | 0.64                                                        | 0.91                           | 0.63                                                       | 0.82                           | 0.63                           | 0.91                           |
| 32: Accommodation and Food Service Activities                                                                                  | 1                  | 0.77                                                        | 0.91                           | 0.10                                                       | 0.85                           | 0.10                           | 0.92                           |
| 33: Publishing, Audiovisual and Broadcasting Activities                                                                        | 1                  | 1                                                           | 1                              | 0.88                                                       | 0.91                           | 0.88                           | 1                              |
| 34: Telecommunications                                                                                                         | 1                  | 1                                                           | 1                              | 0.88                                                       | 0.91                           | 0.88                           | 1                              |
| 35: IT and Other Information Services                                                                                          | 1                  | 1                                                           | 1                              | 0.88                                                       | 0.91                           | 0.88                           | 1                              |
| 36: Financial and Insurance Activities                                                                                         | 1                  | 1                                                           | 1                              | 0.95                                                       | 0.96                           | 0.95                           | 1                              |
| 37: Real Estate Activities                                                                                                     | 1                  | 1                                                           | 1                              | 0.98                                                       | 0.99                           | 0.98                           | 1                              |
| 38: Professional, Scientific and Technical Activities                                                                          | 1                  | 0.90                                                        | 0.95                           | 0.85                                                       | 0.92                           | 0.85                           | 1                              |
| 39: Administrative and Support Services                                                                                        | 1                  | 0.90                                                        | 0.95                           | 0.66                                                       | 0.80                           | 0.66                           | 0.90                           |
| 40: Public Administration and Defence, Compulsory Social Security                                                              | 1                  | 0.96                                                        | 1                              | 1                                                          | 1                              | 1                              | 1                              |
| 41: Education                                                                                                                  | 1                  | 0.10                                                        | 0.10                           | 0.10                                                       | 1                              | 0.10                           | 1                              |
| 42: Human Health and Social Work Activities                                                                                    | 1                  | 1                                                           | 1                              | 0.75                                                       | 0.92                           | 0.75                           | 1                              |
| 43: Arts, Entertainment and Recreation                                                                                         | 1                  | 0.90                                                        | 0.96                           | 0.55                                                       | 0.71                           | 0.55                           | 0.94                           |
| 44: Other Service Activities                                                                                                   | 1                  | 0.90                                                        | 0.96                           | 0.54                                                       | 0.83                           | 0.54                           | 0.94                           |
| 45: Activities of Households as Employers, Undifferentiated Goods- and Services-Producing Activities of Households for Own Use | 1                  | 0.90                                                        | 0.96                           | 0.49                                                       | 0.53                           | 0.49                           | 0.94                           |
|                                                                                                                                | <i>Assumed</i>     | <i>Calculated<sup>94</sup></i>                              | <i>Calculated<sup>94</sup></i> | <i>Calculated<sup>95</sup></i>                             | <i>Calculated<sup>95</sup></i> | <i>Calculated<sup>95</sup></i> | <i>Calculated<sup>96</sup></i> |

**Table S3:** Economic configurations for different closure strategies: the extent to which each economic sector is open during times of heavy and light closures, denoted  $x_j(t)$ , expressed as a proportion. Each closure strategy begins and ends with the fully-open configuration  $x_j(t) = 1$ .

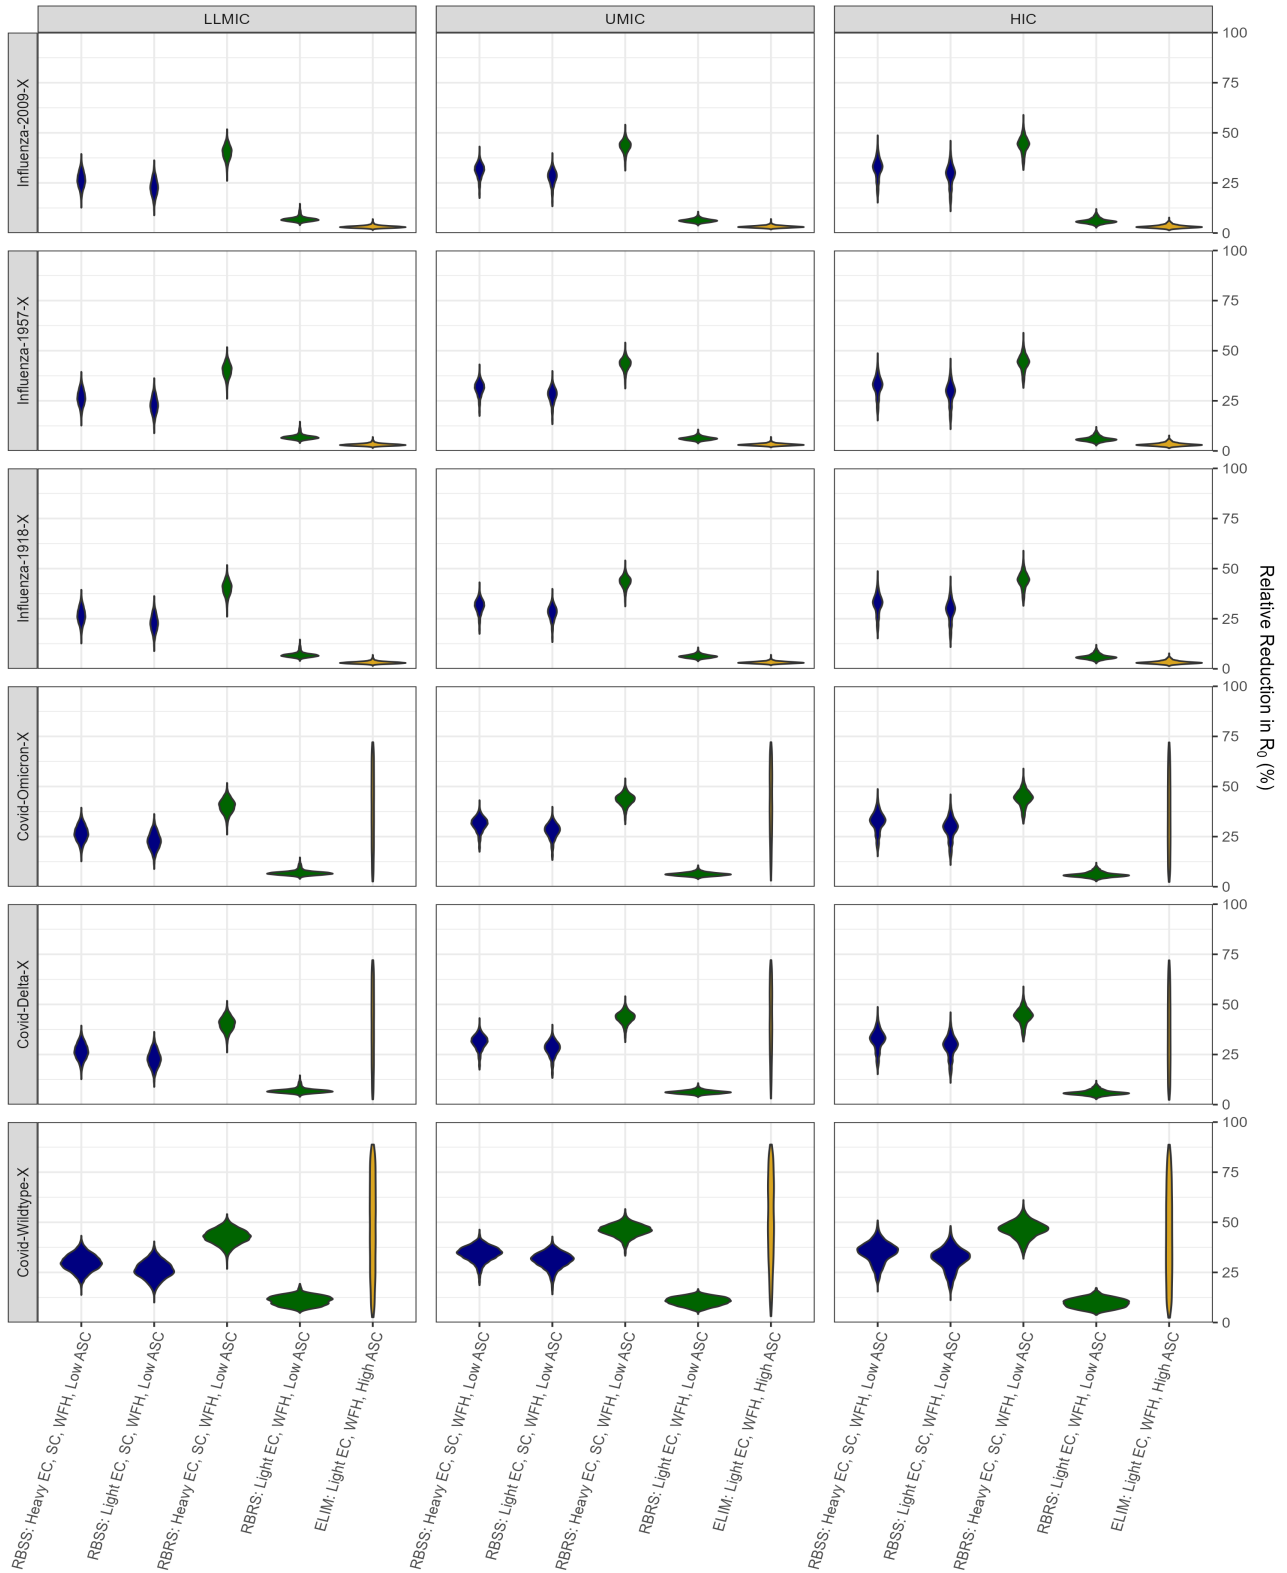

**Figure S5:** Distributions of the relative reduction in  $R_0$  under different closure strategy configurations and corresponding ascertainment régimes, for each disease and country-income-group archetype. The closure strategies (colours) include Reactive-Business/Sustained-School Closures (RBRS), Reactive-Business/Reactive-School Closures (RBSS) and Elimination (ELIM), and the light- and heavy-closure configurations encompass economic closures (EC), school closures (SC) and working-from-home (WFH), as indicated on the plot axis. The Elimination strategy heavy-closure configuration is identical to that of the Reactive-Business/Reactive-School Closures strategy (see Table 2.4) and hence not plotted, nor is the No Closures strategy shown, since there is no mandated closures nor working-from-home. The distributions exclude the additional reduction in transmission associated with distancing (see Figure S4), but include the reduction in transmission associated with case isolation in the low- and high-ascertainment régimes (see section 2.3), where it is noted that the Elimination strategy light-closure configuration is only likely to be entered in the high-ascertainment régime at low prevalence.

## 496 2.5 Socioeconomic Loss

497 In order to compare outcomes under different closure strategies, the health, economic and educational losses are  
 498 quantified from a societal perspective<sup>99</sup>. Following a similar method to recent work by Johnson and colleagues<sup>16</sup>,  
 499 the total socioeconomic loss (TSL) is defined as the sum of the value of life-years lost (VLYL), GDP loss (GDPL)  
 500 and the value of school-years lost (VSYL):

$$\begin{aligned} \text{TSL} &= \text{VLYL} + \text{GDPL} + \text{VSYL} \\ &= \text{LYL} \cdot \text{VLY} + \left( \frac{T^{\text{end}}}{365} Y_0 - Y \right) + \text{SYL} \cdot \text{VSY}, \end{aligned}$$

501 where LYL is the number of life-years lost,  $Y$  is actual GDP relative to annual pre-pandemic GDP  $Y_0$  and SYL  
 502 is the number of school-years lost (see subsequent paragraphs). VLY is the monetary value of a life-year and  
 503 VSY is the monetary value of a school-year, used to convert the losses to common units, which allows for the  
 504 comparison of scenarios with potential trade-offs between competing objectives. Discounting is not applied;  
 505 therefore, these values represent unweighted monetary losses at the time of pandemic occurrence, rather than  
 506 the present value. See 16 for more details on the losses that are included and excluded. In this study, the  
 507 TSL and its components are normalised by annual pre-pandemic GDP, i.e.  $\text{TSL}/Y_0$ ,  $\text{VLYL}/Y_0$ ,  $\text{GDPL}/Y_0$  and  
 508  $\text{VSYL}/Y_0$ , to also allow for comparison of losses between different income-group archetypes.

### 509 Health Loss: Value of Life-Years Lost

The VLYL is the product of the number of life-years lost LYL and the value of a life-year VLY, where the  
 valuation of life is based on the intrinsic rather than the instrumental interpretation<sup>100</sup>, i.e. an individual's  
 willingness to pay for reductions in their own mortality risk. The number of life-years lost is defined as

$$\text{LYL} = \sum_{j,v} D_{j,v}(T^{\text{end}}) \hat{l}_g^{(\text{death})},$$

where  $\sum_{j,v} D_{j,v}(T^{\text{end}})$  is the cumulative number of deaths by the end of the simulation  $T^{\text{end}}$  and

$$\hat{l}_g^{(\text{death})} = \sum_{a \in g} \tilde{l}_a \frac{\tilde{p}_a^{\text{IFR}} \tilde{N}_a}{\sum_{a' \in g} \tilde{p}_{a'}^{\text{IFR}} \tilde{N}_{a'}}$$

is the aforementioned remaining life-expectancy mapped from five-year age-bands to the model age-groups  
 weighting by population and IFR. The value of a life-year is defined as

$$\text{VLY} = \frac{\text{VSL}}{\left( \frac{\sum_g \hat{l}_g^{(\text{life})} \tilde{N}_g}{\sum_g \tilde{N}_g} \right)}$$

where VSL is the value of a statistical life and

$$\hat{l}_g^{(\text{life})} = \sum_{a \in g} \tilde{l}_a \frac{\tilde{N}_a}{\sum_{a' \in g} \tilde{N}_{a'}}$$

is the aforementioned remaining life-expectancy mapped from five-year age-bands to the model age-groups  
 weighting by population only. Here, the VSL is interpreted to be the population- and remaining-life-expectancy-  
 weighted-average VLY, where each year has equal value<sup>101,102</sup>. The VSL itself is calculated according to the  
 Masterman-Viscusi model<sup>103</sup> extrapolating from values for the USA, specifically

$$\text{VSL} = \begin{cases} \text{VSL}^{\text{USA}} \left( \frac{\text{GDP}_{pc}}{\$8809} \right) \left( \frac{\$8809}{\text{GDP}_{pc}^{\text{USA}}} \right)^{0.85} & \text{if } \text{GDP}_{pc} < \$8809, \\ \text{VSL}^{\text{USA}} \left( \frac{\text{GDP}_{pc}}{\text{GDP}_{pc}^{\text{USA}}} \right) & \text{otherwise;} \end{cases}$$

510 where  $\text{VSL}^{\text{USA}} = \$10,900,000$  is the VSL of the USA<sup>104</sup>,  $\text{GDP}_{pc}^{\text{USA}} = \$60,362$  is the GDP per capita of  
 511 the USA<sup>28</sup>, and  $\text{GDP}_{pc} = Y_0 / \sum_j N_j$  is GDP per capita of the synthetic country in question, given annual  
 512 pre-pandemic GDP  $Y_0$ .

### 513 Economic Loss: GDP Loss

The GDPL is the deviation of the actual GDP  $Y$  from a counterfactual scenario with  $\frac{T^{end}}{365}$  years of annual pre-pandemic GDP  $Y_0$ , which is a measure of the short-term loss of GDP induced by reduced labour supply due to the disease itself (worker illness and death) and due to mitigation (economic sector closures and worker isolation). Here, actual GDP is defined as

$$Y = \sum_{j \neq edu}^{45} \frac{y_j}{365} \int_{t=0}^{T^{end}} x_j(t)(N_j - N_j^{abs}(t))dt + \frac{y_{edu}}{365} N_{edu} T^{end},$$

where  $y_j$  is annual GVA per worker in sector  $j$ ,  $N_j - N_j^{abs}(t)$  is the available workforce given  $N_j^{abs}(t)$  worker absences due to illness, death and isolation, and  $x_j(t)$  is the extent to which each sector is open at time  $t$  (see section 2.4). Note that the education sector is treated separately (see subsequent paragraphs). The assumption underlying this equation is that the production of each economic sector scales linearly with both the extent to which it is open and the effective labour supply available to it, at a given time. In particular, the number of worker absences in sector  $j$  at time  $t$  is defined as

$$N_j^{abs}(t) = \sum_v \left( I_{j,v}^s(t) + H_{j,v}(t) + D_{j,v}(t) + I_{j,v}^{ai}(t) \frac{T^{iso}}{T^{I^a:R}} (1 - q_j(t)) + I_{j,v}^{si}(t) \frac{T^{iso}(1 - p_{j,v}^H(t)) + T_{j,v}^{I^s}(t) p_{j,v}^H(t)}{T_{j,v}^{I^s}(t)} \right),$$

514 where the number of isolating asymptomatic infectious  $I^a j, v(t)$  and isolating symptomatic infectious  $I^s j, v(t)$   
515 are scaled by the mandatory isolation period  $T^{iso}$  relative to the corresponding infectious periods (see sections 2.2  
516 and 2.3), and  $T^{iso} = T^{E:I} + \max(T^{I^a:R}, T^{I^s:R}, T^{I^s:H})$ . It is assumed that the isolating asymptomatic infectious  
517 are also capable of home-working, even if isolating, and so  $I^a j, v(t)$  is also scaled by the complement of the  
518 proportion of workers home-working  $q_j(t)$ . Here, the economic impact is measured solely in terms of reduced  
519 labour supply, but other factors such as behavioural changes regarding the supply of labour or consumption,  
520 changes in capital, or price dynamics are not considered.

### 521 Educational Loss: Value of School-Years Lost

The VSYL is the product of the number of school-years lost SYL and the value of a school-year VSY, which is a measure of the impact of lost education on long-term worker productivity and economic growth<sup>16</sup>. The number of school-years lost is defined as

$$SYL = \frac{1}{365} \int_{t=0}^{T^{end}} (N_{stu}^{abs}(t) + (N_{stu} - N_{stu}^{abs}(t))(1 - x_{edu}(t))(1 - 1/3)) dt,$$

where  $N_{stu} = N_{47}$  is the school-age population,  $N_{stu}^{abs}(t)$  is the number of student absences due to illness, death and isolation, and  $x_{edu}(t) = x_{41}(t)$  is the extent to which the education sector is open. This equation encodes education lost due to the disease itself (student illness and death) and due to mitigation (school closures and student isolation), but accounts for the effect of remote teaching in alleviating the education lost due to school closures specifically, assuming relative effectiveness of remote teaching of  $1/3$ <sup>105,106</sup>. In particular, the number of student absences at time  $t$  is defined as

$$N_{stu}^{abs}(t) = \sum_v \left( I_{47,v}^s(t) + H_{47,v}(t) + D_{47,v}(t) + I_{47,v}^{ai}(t) \frac{T^{iso}}{T^{I^a:R}} + I_{47,v}^{si}(t) \frac{T^{iso}(1 - p_{47,v}^H(t)) + T_{47,v}^{I^s}(t) p_{47,v}^H(t)}{T_{47,v}^{I^s}(t)} \right),$$

analogous to worker absences above, except for the home-working scaling factor. The value of a school-year (per student) is defined as

$$VSY = \frac{p^{GDP} Y_0}{N_{stu}},$$

where

$$p^{GDP} = \begin{cases} 1.07 & \text{for LLMICs,} \\ 0.67 & \text{for UMICs,} \\ 0.27 & \text{for HICs;} \end{cases}$$

522 is the income-group-dependent proportion of annual pre-pandemic GDP lost (in the long-term but discounted  
523 to present-day) under one year of school closures, calculated from Psacharopoulos et al.<sup>107</sup>. It is assumed that

524 each VSY has equal value in time, applied equally to the number of school-years lost, meaning that any potential  
525 'catch-up' in lost education following the reopening of schools is not considered <sup>108,109</sup>.

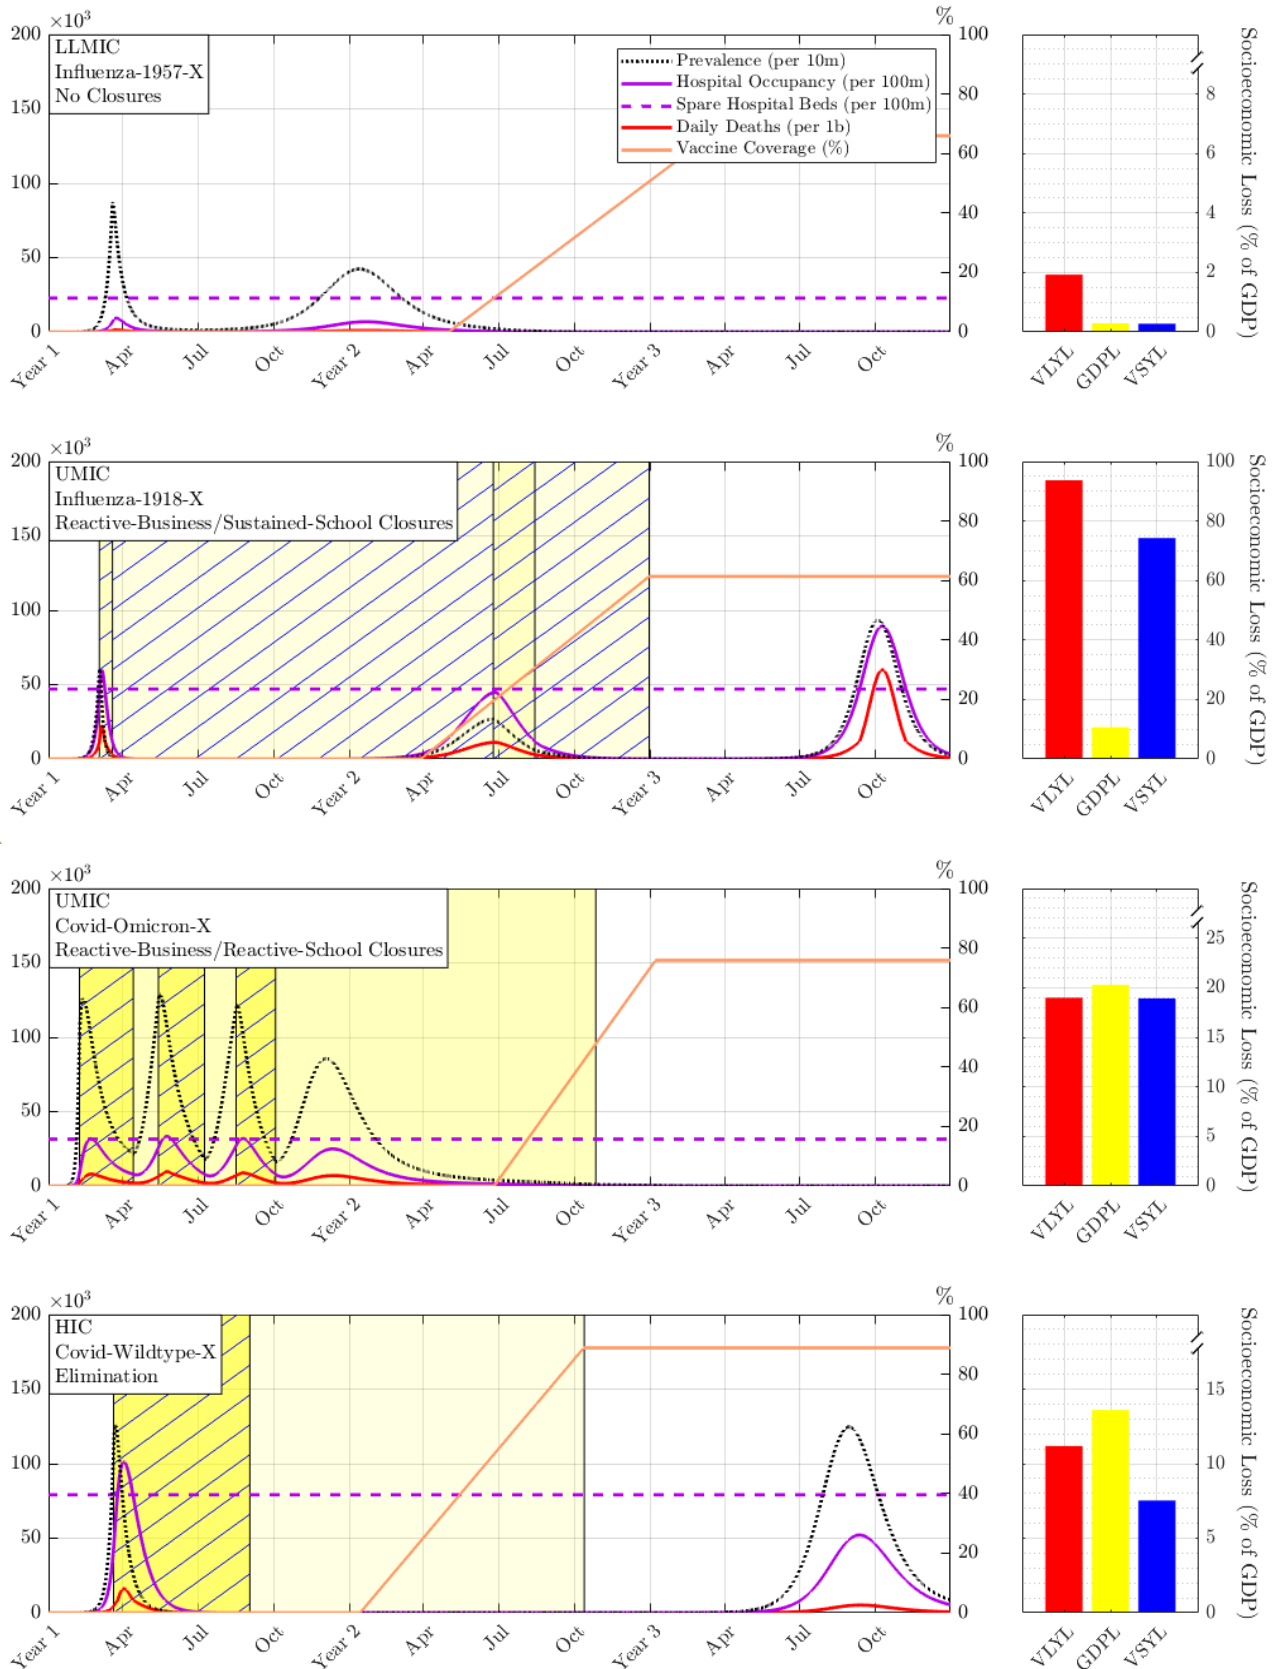

**Figure S6:** A realisation of each closure strategy and the resulting socioeconomic losses (expressed as a percentage of annual GDP) broken down into VLYL, GDPL and VSYL, for various diseases and country-income groups. The yellow shading represents the average extent of economic closures for businesses imposed at a given time and the blue diagonal lines represent whether school closures are imposed, under a given strategy.

| <b>Data</b>                         | <b>Source</b>              | <b>Year</b> | <b>Reference</b>       |
|-------------------------------------|----------------------------|-------------|------------------------|
| Population by Age                   | United Nations             | 2019        | <a href="#">23</a>     |
| Life-Expectancy by Age              | WHO                        | 2025        | <a href="#">24</a>     |
| Workforce by Sector                 | OECD, ILO                  | 2021, 2025  | <a href="#">26, 27</a> |
| GVA by Sector                       | OECD                       | 2021        | <a href="#">28</a>     |
| Contact Matrices by Age and Setting | Prem et al. (2017), (2021) | 2017, 2021  | <a href="#">30, 31</a> |
| Google Mobility Trends by Setting   | Our World in Data          | 2020        | <a href="#">60</a>     |
| Covid-19 Stringency Index           | Our World in Data          | 2021        | <a href="#">61</a>     |
| Covid-19 Deaths                     | Our World in Data          | 2020        | <a href="#">63</a>     |
| Covid-19 Excess Mortality           | Wang et al. (2022)         | 2022        | <a href="#">64</a>     |
| Covid-19 Testing                    | Our World in Data          | 2020        | <a href="#">75</a>     |
| Covid-19 Ascertainment              | Russell et al.             | 2020        | <a href="#">76</a>     |
| Hospital Beds                       | World Bank                 | 2021        | <a href="#">77</a>     |
| Hospital Bed Occupancy Rate         | WHO                        | 2024        | <a href="#">78</a>     |
| Covid-19 Vaccinations               | Our World in Data          | 2020        | <a href="#">81</a>     |
| Working-from-Home                   | Gottlieb et al. (2021)     | 2021        | <a href="#">98</a>     |

**Table S4:** Overview of country-level data employed in the analysis, sources and references.



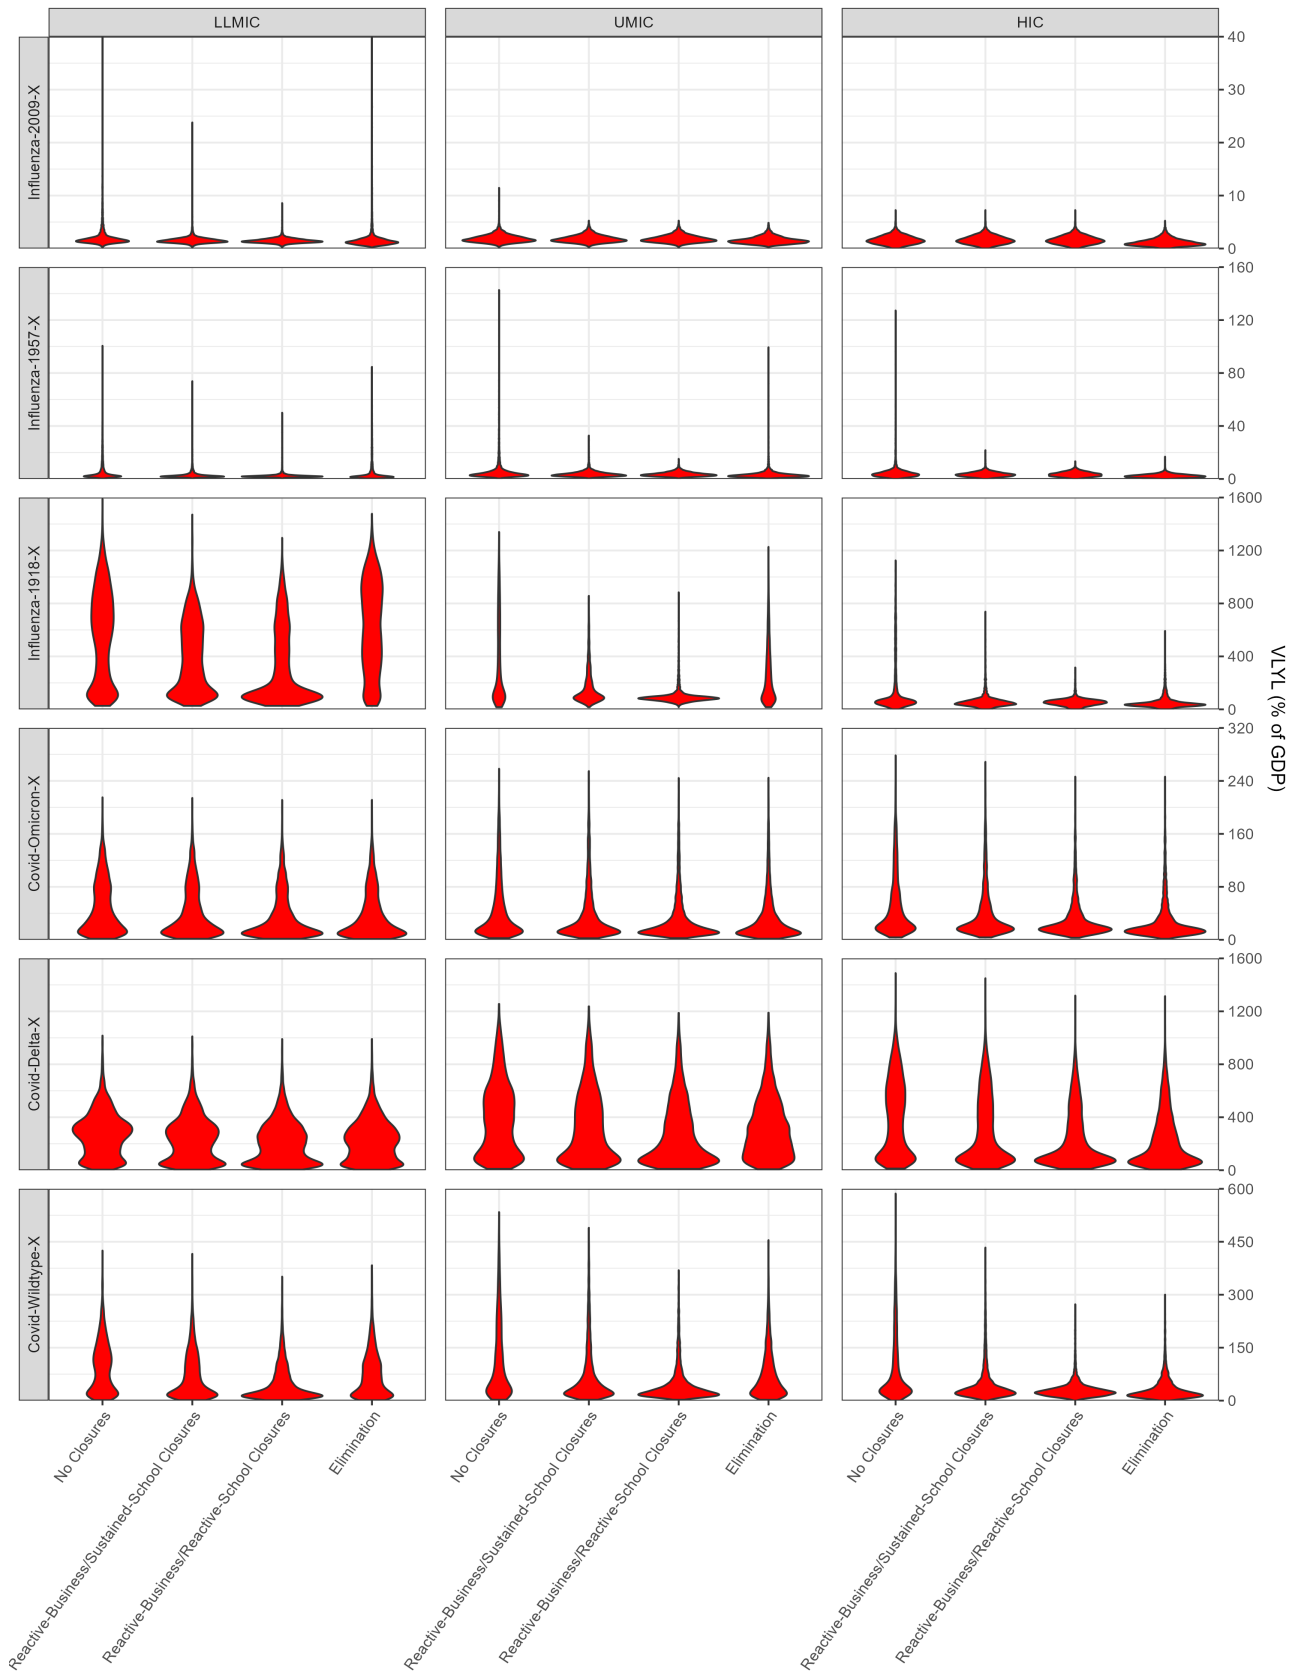

**Figure S7:** Distributions of projected VLYL (expressed as a percentage of annual GDP) under different closure strategies, for each disease and country-income group. Summary statistics are shown in Table S6.

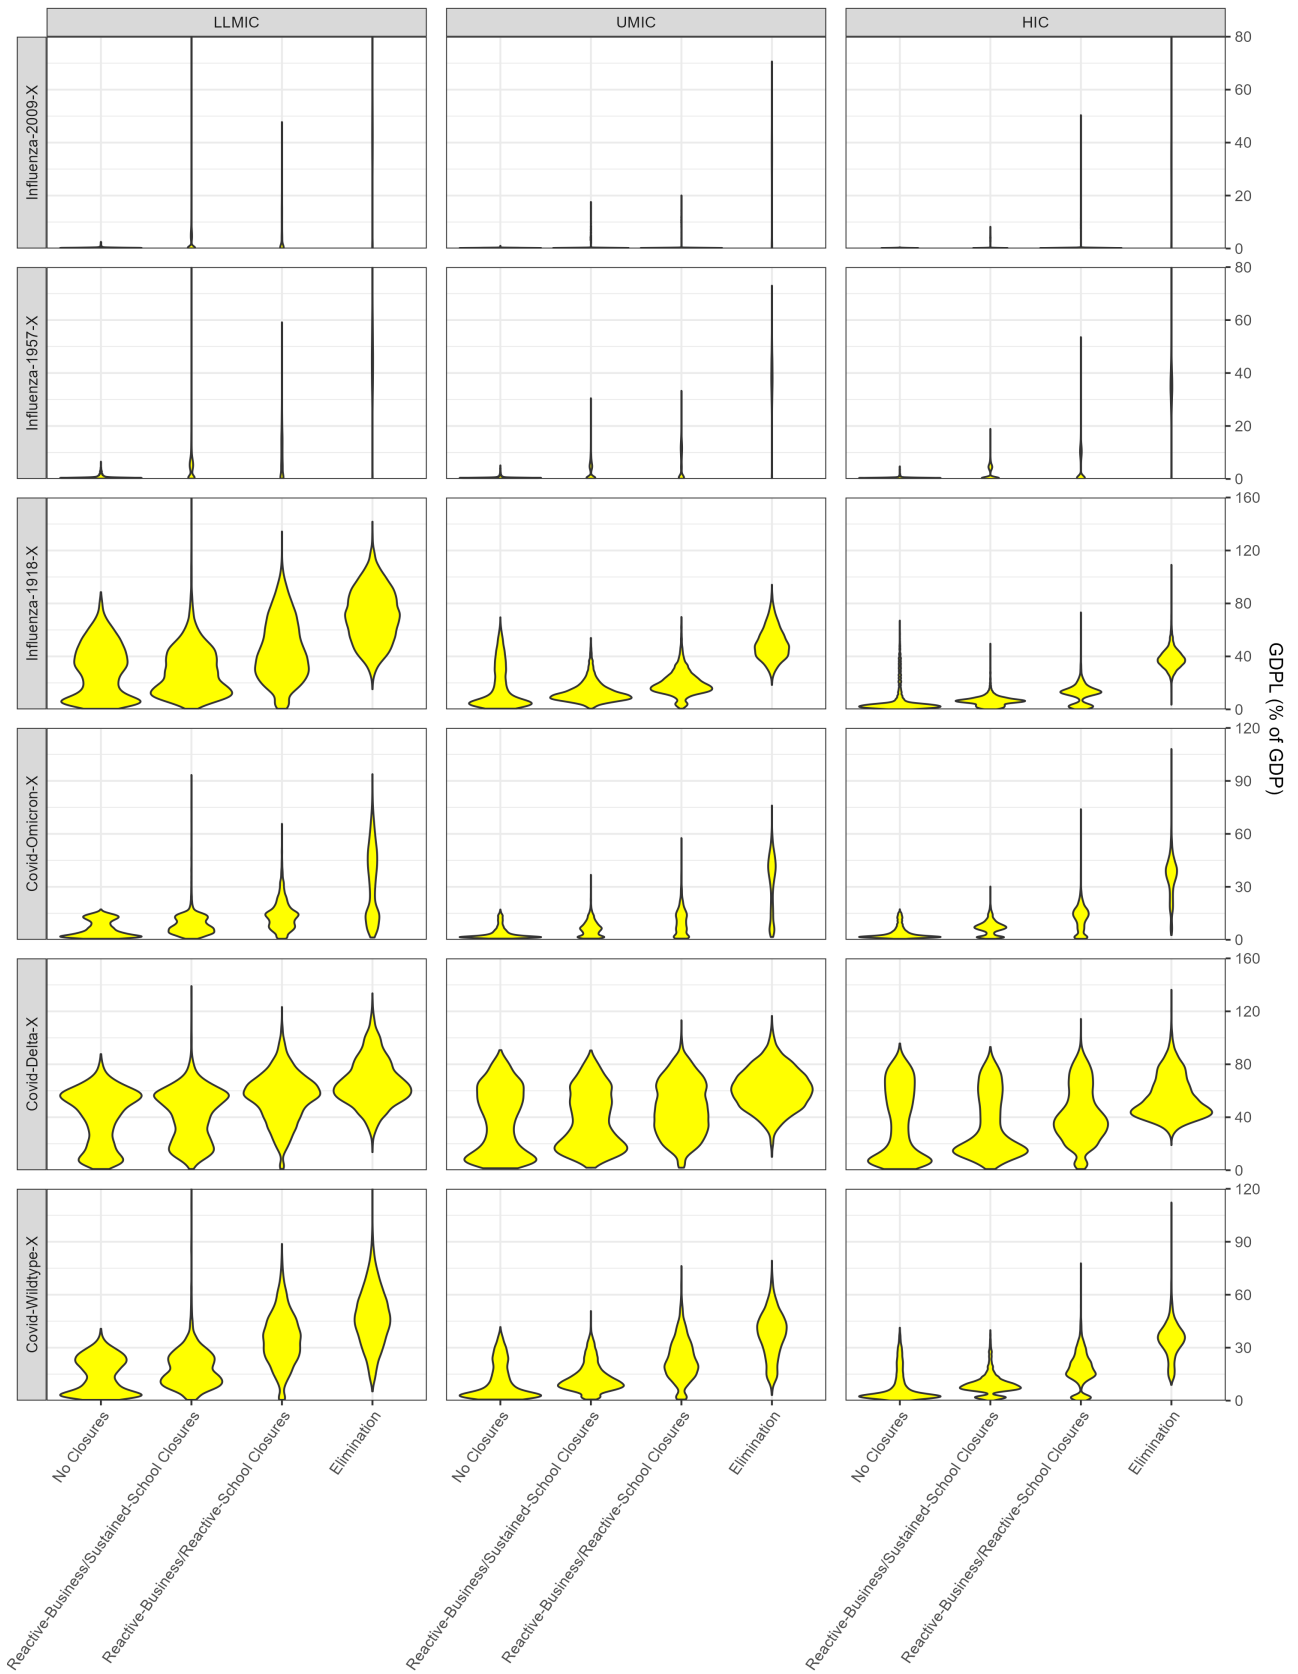

**Figure S8:** Distributions of projected GDPL (expressed as a percentage of annual GDP) under different closure strategies, for each disease and country-income group. Summary statistics are shown in Table S7.

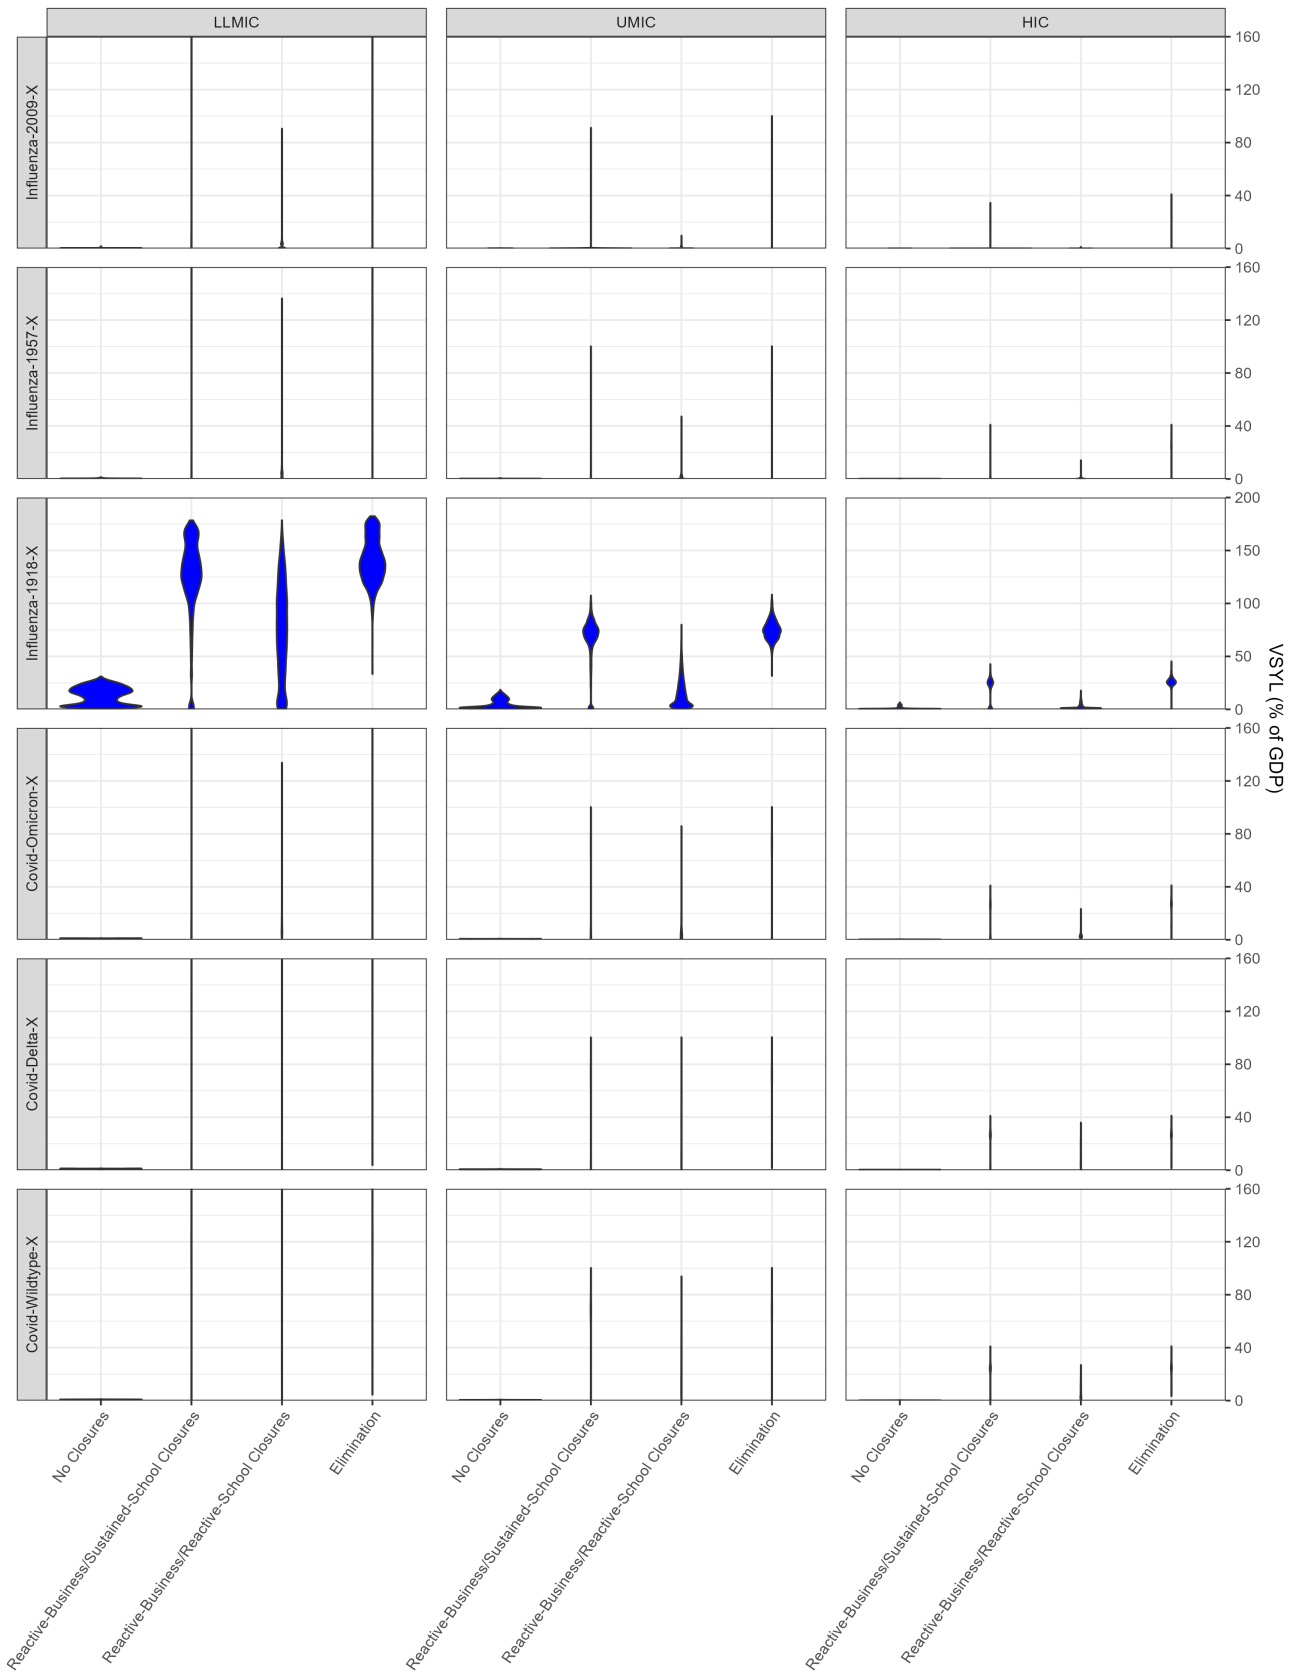

**Figure S9:** Distributions of projected VSYL (expressed as a percentage of annual GDP) under different closure strategies, for each disease and country-income group. Summary statistics are shown in Table S8.

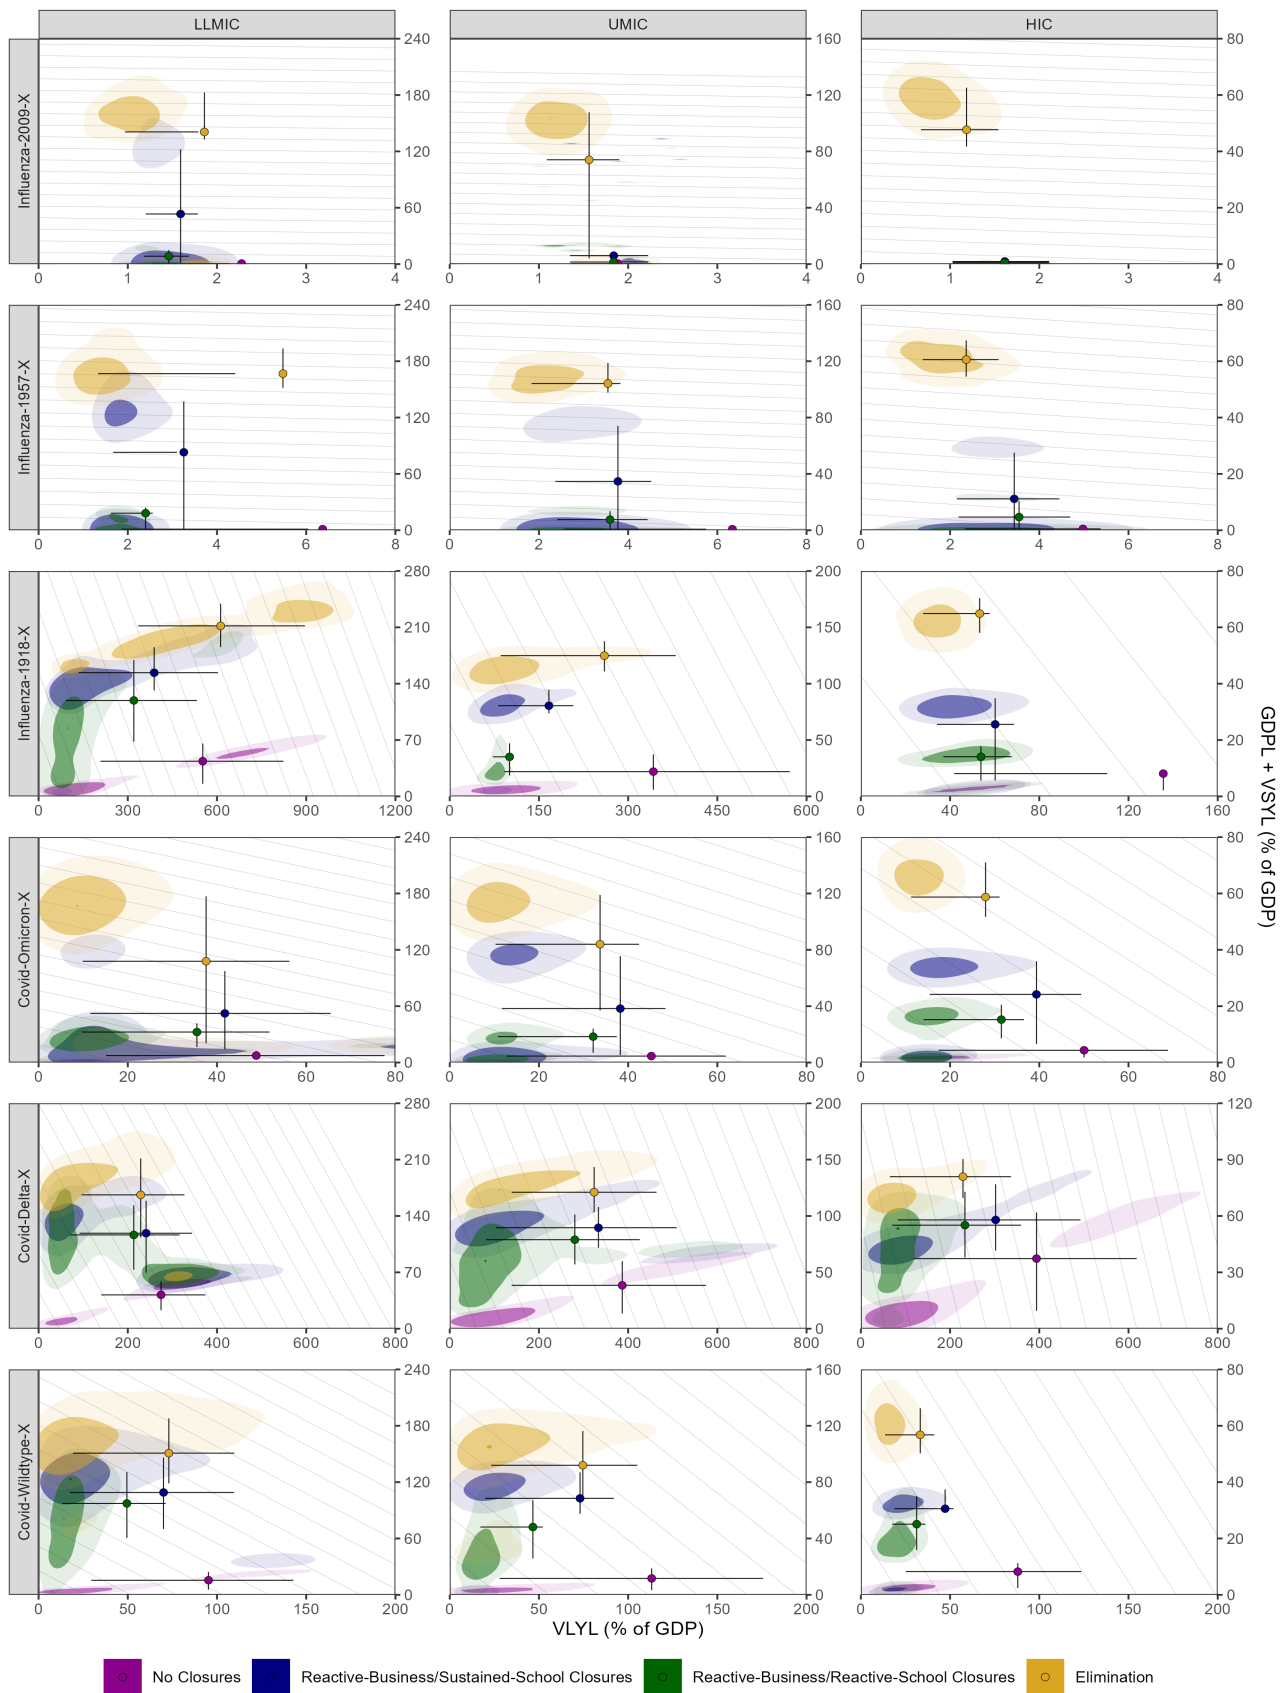

**Figure S10:** Joint distributions of projected VLYL and GDPL + VSYL (expressed as a percentage of annual GDP) under different closure strategies, for each disease and country-income group. The mean VLYL and GDPL + VSYL (circles), and inter-quartile range (errorbars) are plotted for each closure strategy (colours). Summary statistics are shown in SI Tables S6-S8.

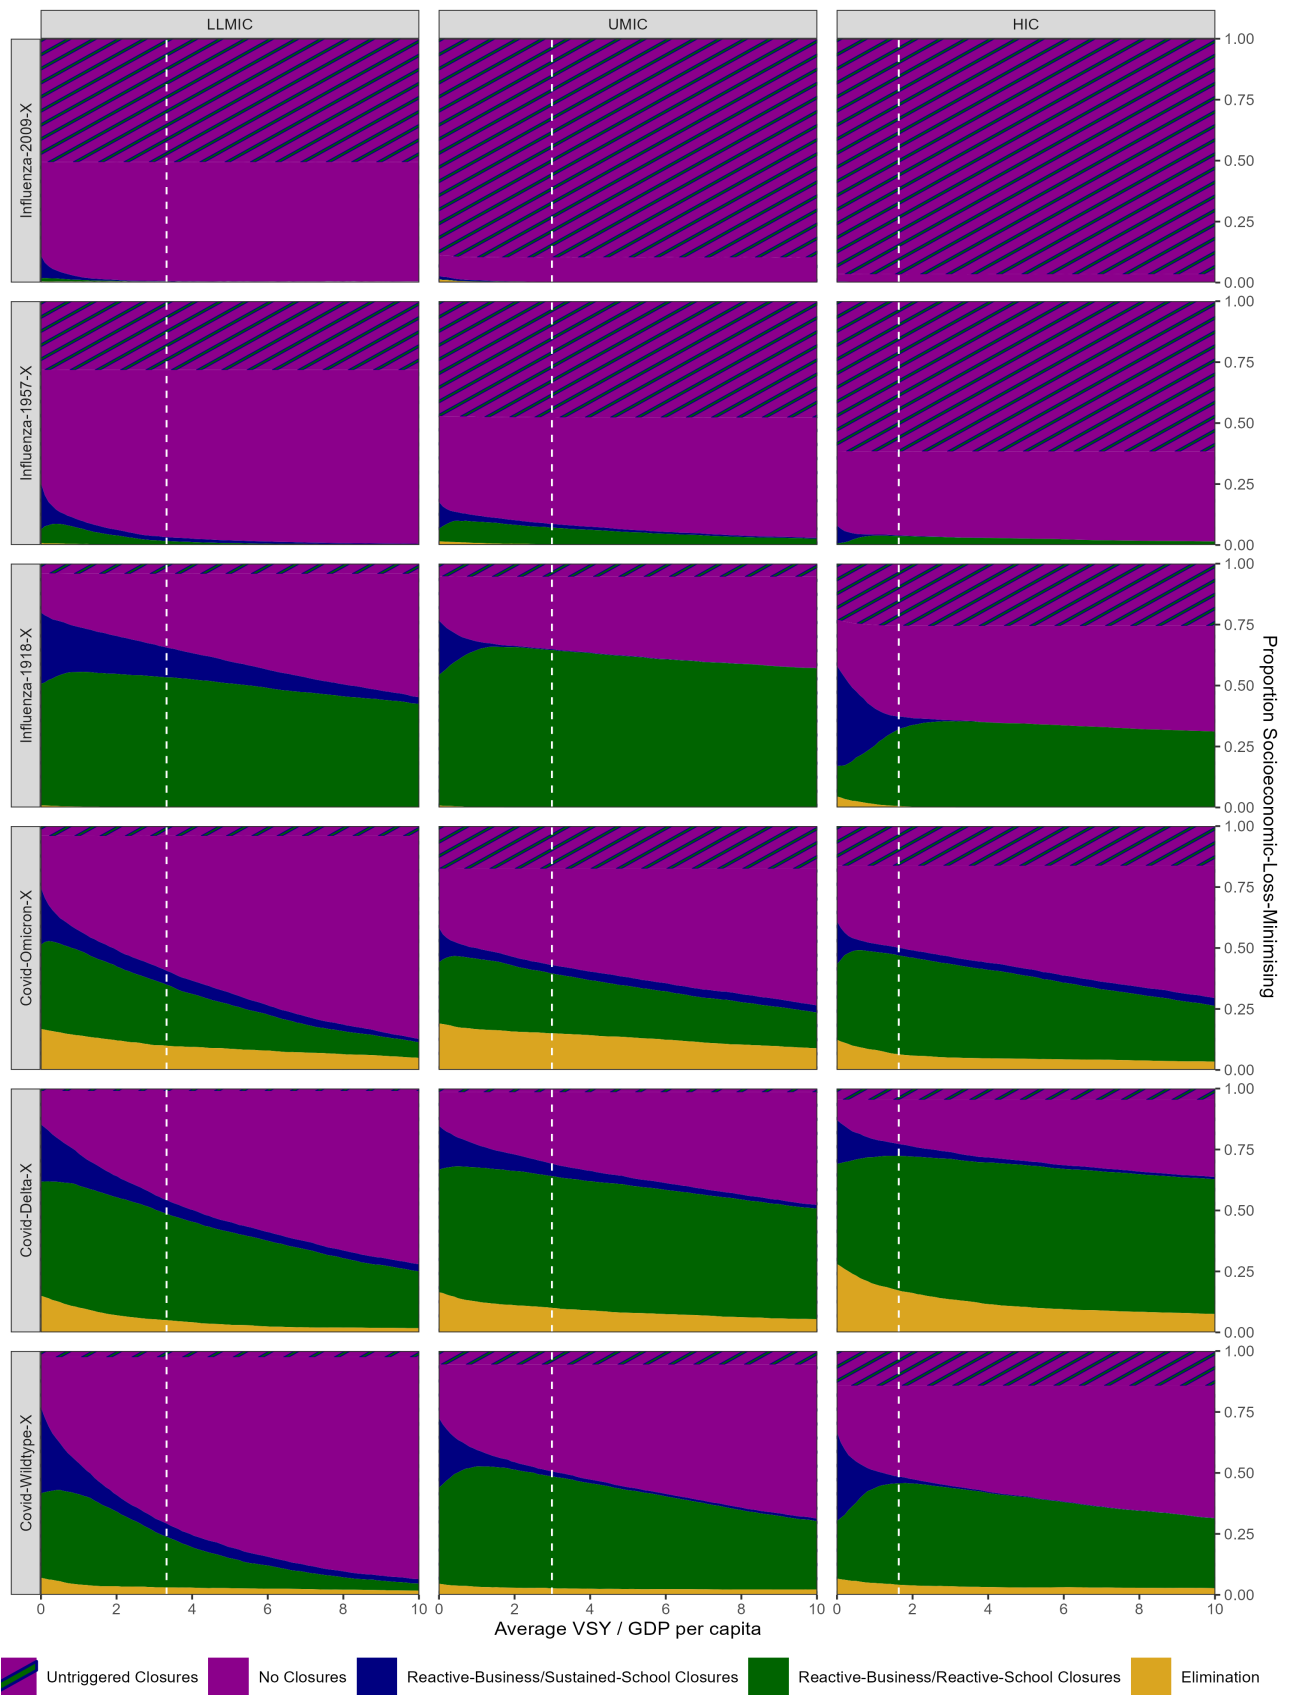

**Figure S11:** Proportion of synthetic countries for which each closure strategy is socioeconomic-loss-minimising, as a function of average VSX (expressed as a multiple of GDP per capita), for each disease and country-income group. Untriggered Closures is not a distinct closure strategy (colours), but instead refers to the situation where closures are not triggered under the Reactive-Business/Sustained-School or Reactive-Business/Reactive-School Closures strategies, resulting in socioeconomic loss equal to that of the No Closures strategy. The vertical dashed line represents the income-group-average VSX at baseline.

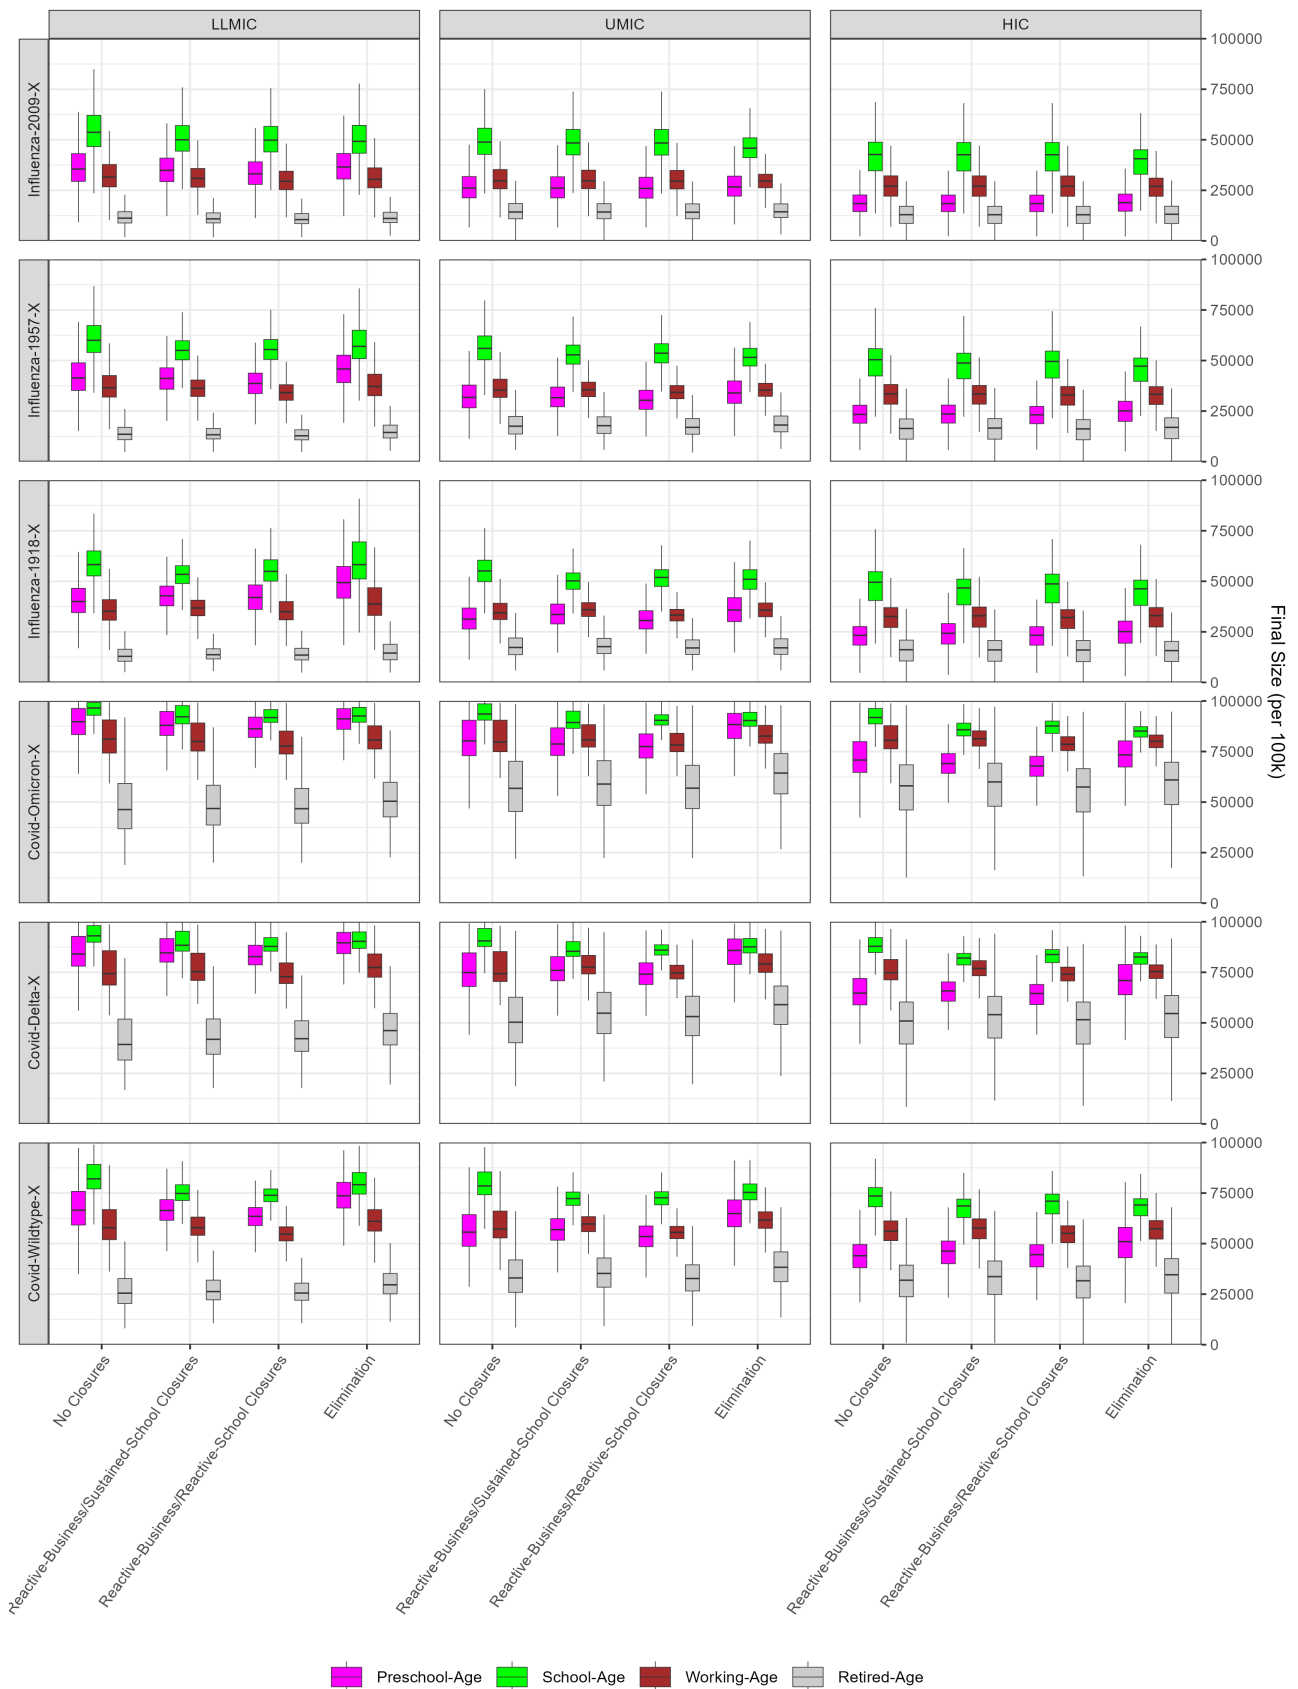

**Figure S12:** Distributional effects: distributions of projected epidemic final size by age-group (per 100k population) under different closure strategies, for each respiratory disease and country-income group.

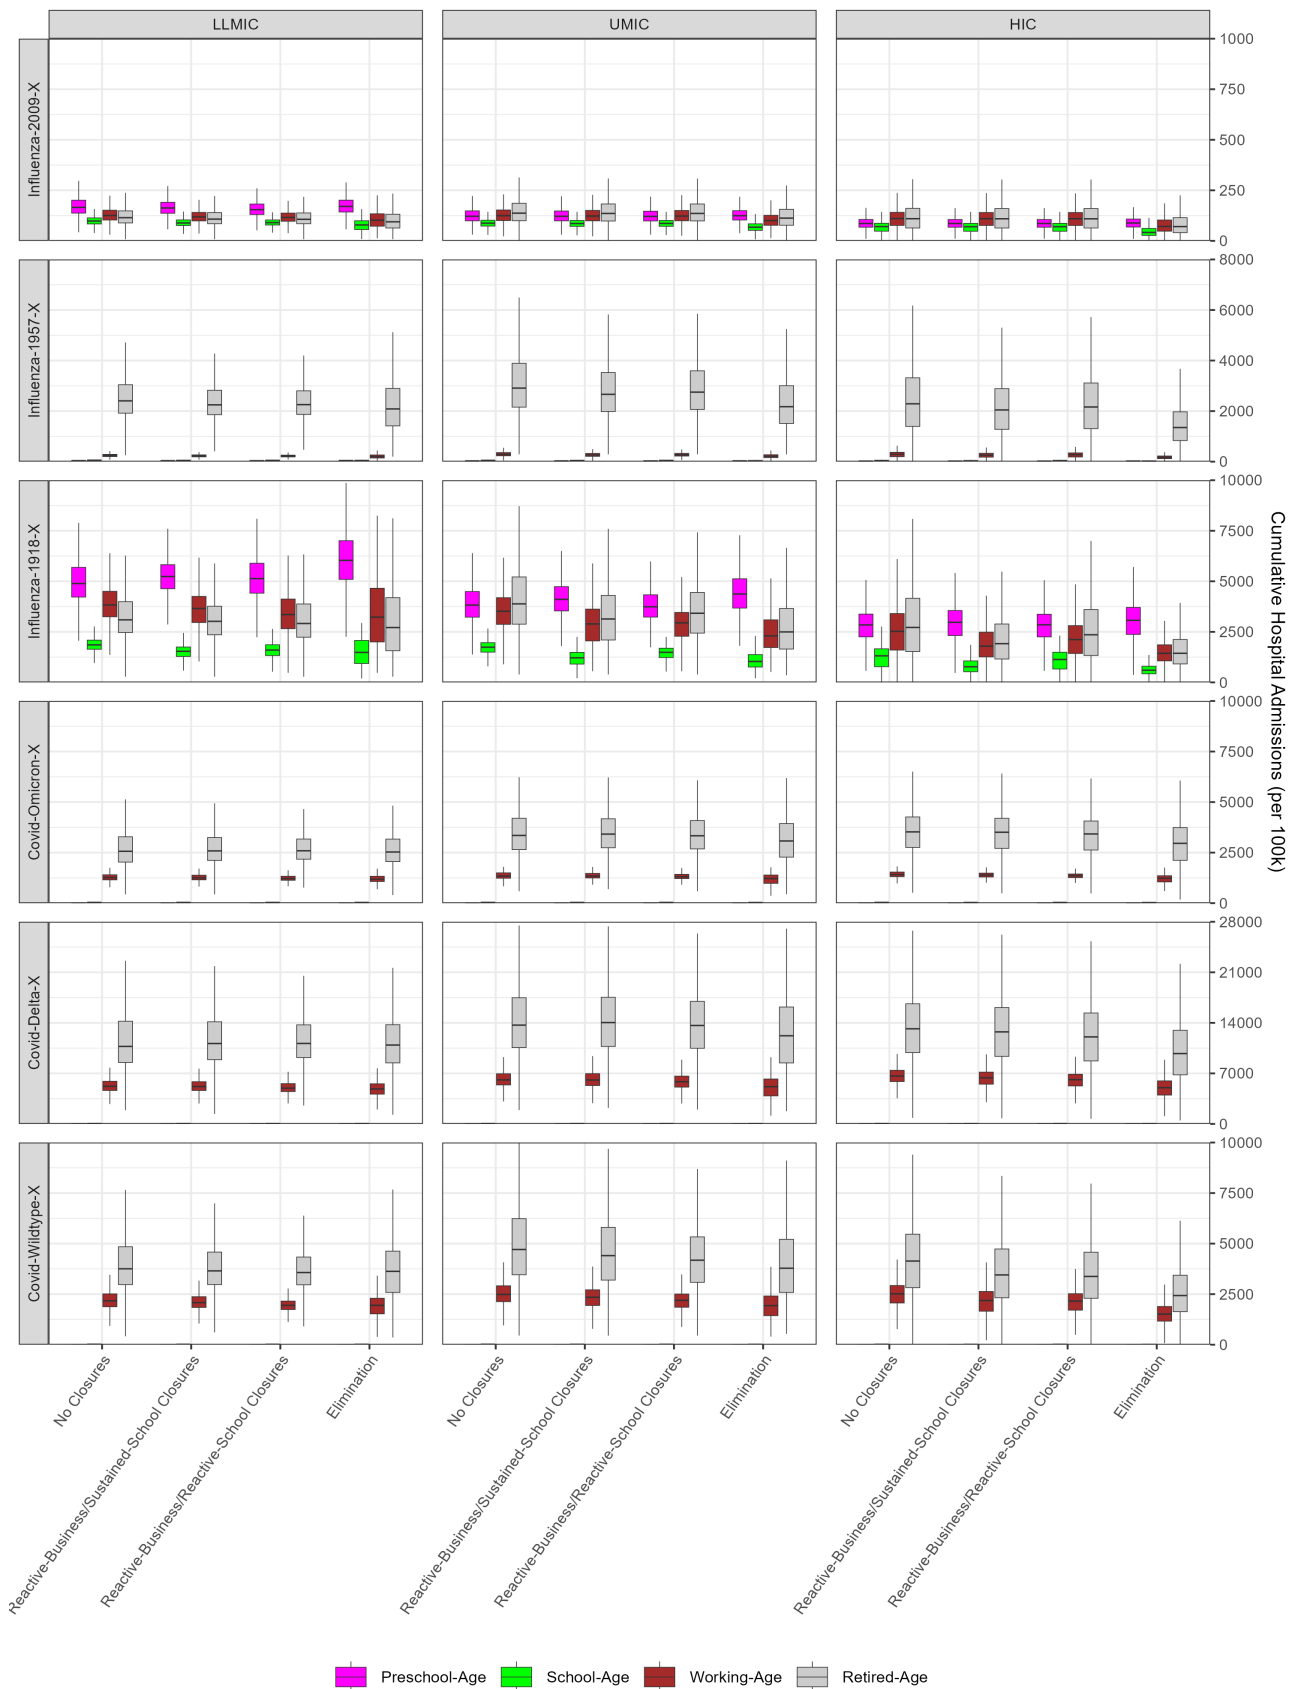

**Figure S13:** Distributional effects: distributions of projected cumulative hospital admissions by age-group (per 100k population) under different closure strategies, for each respiratory disease and country-income group.

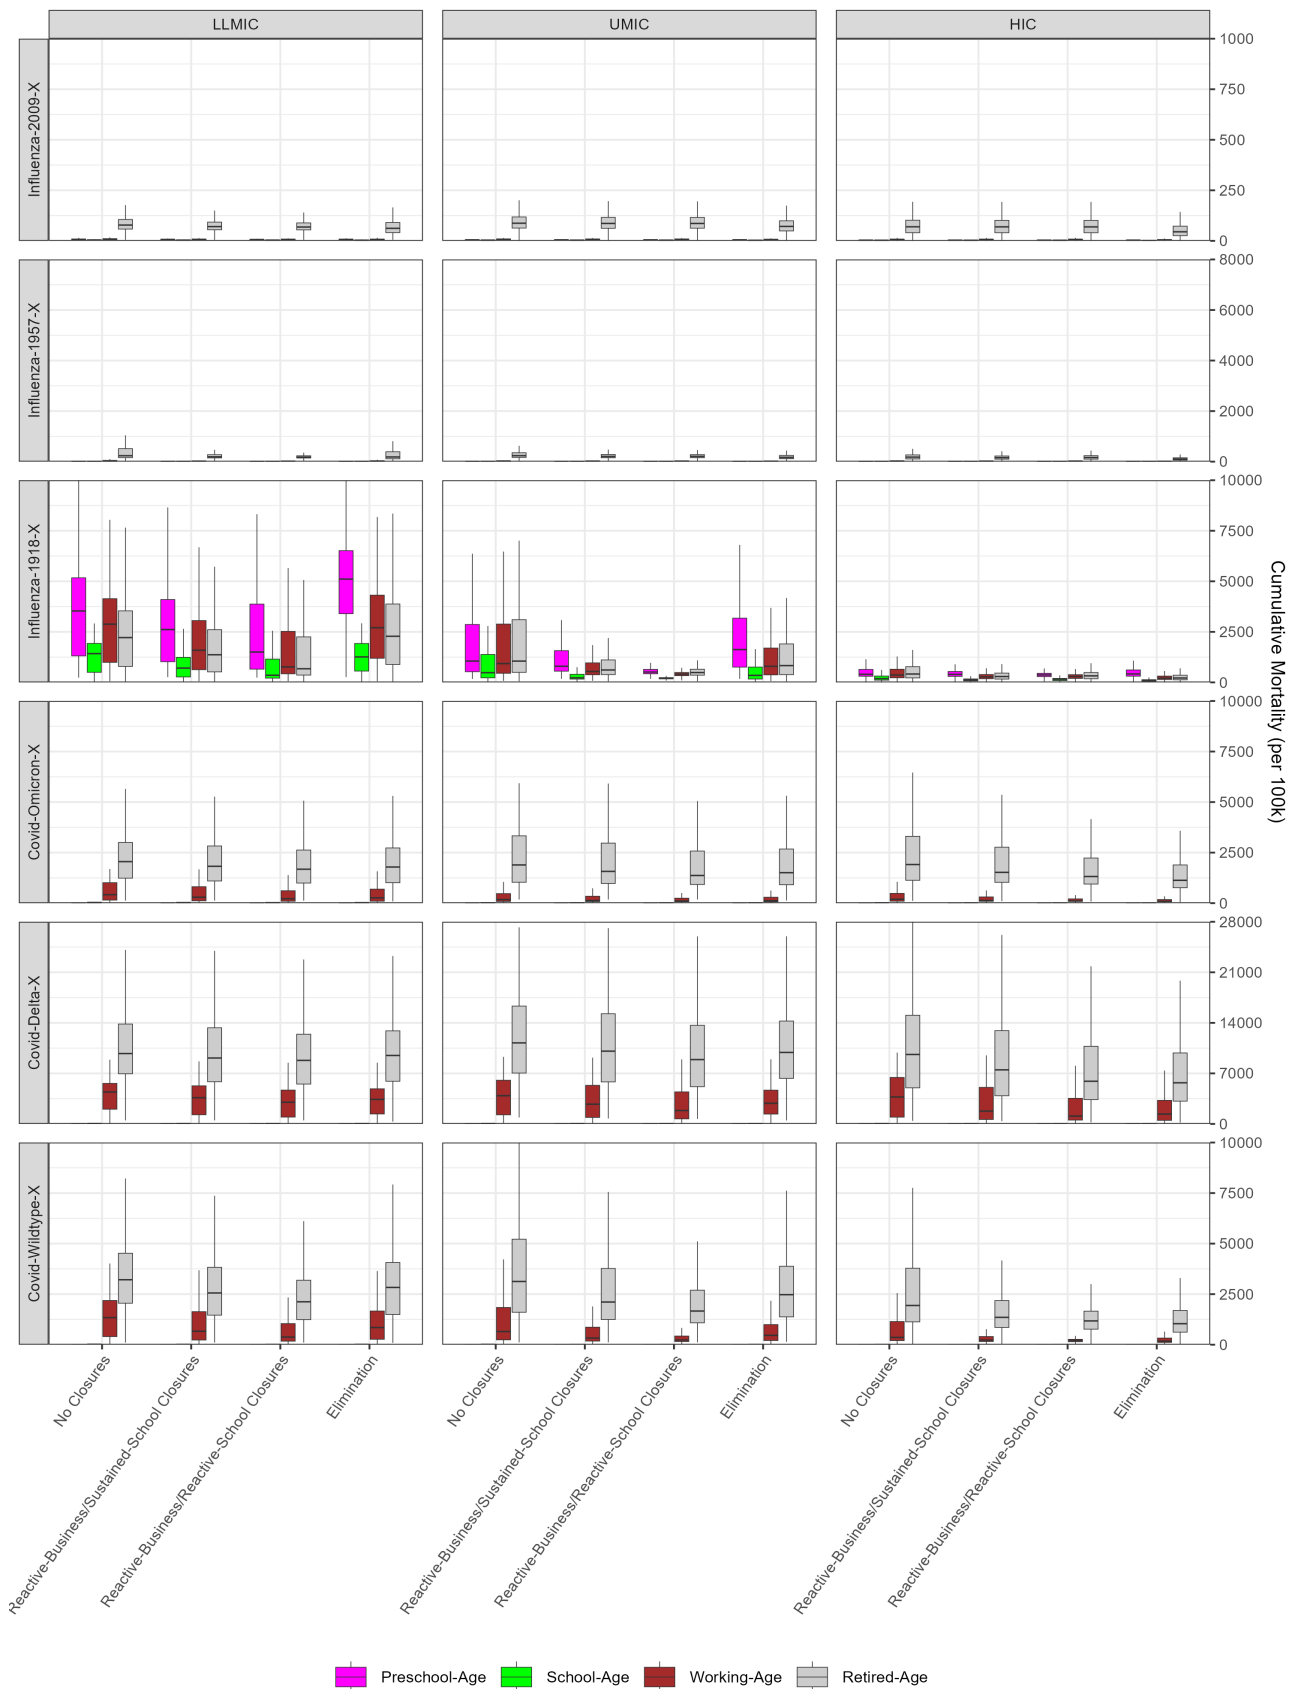

**Figure S14:** Distributional effects: distributions of projected mortality by age-group (per 100k population) under different closure strategies, for each respiratory disease and country-income group.

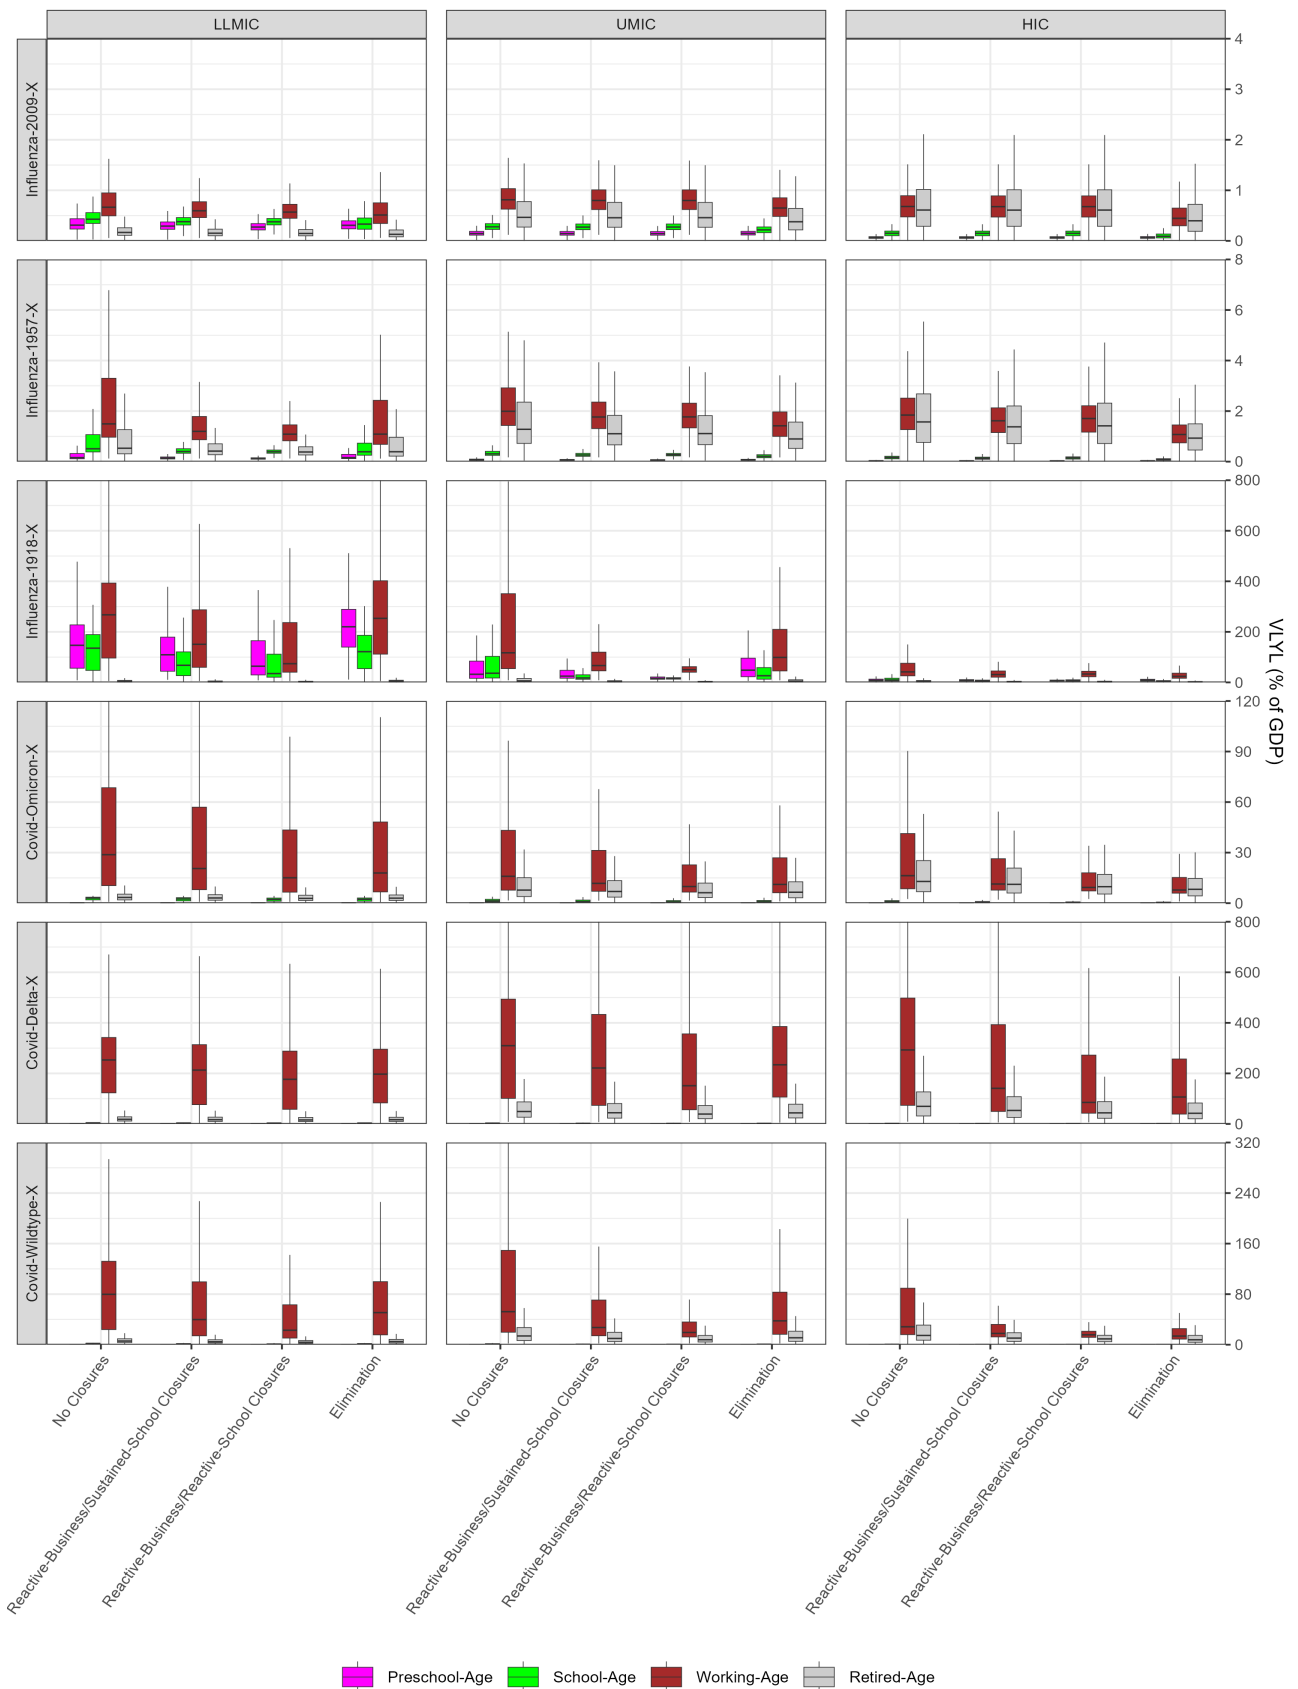

**Figure S15:** Distributional effects: distributions of projected value of life-years lost (VLYL) by age-group (expressed as a percentage of annual GDP) under different closure strategies, for each respiratory disease and country-income group. Summary statistics are shown in Table S10.

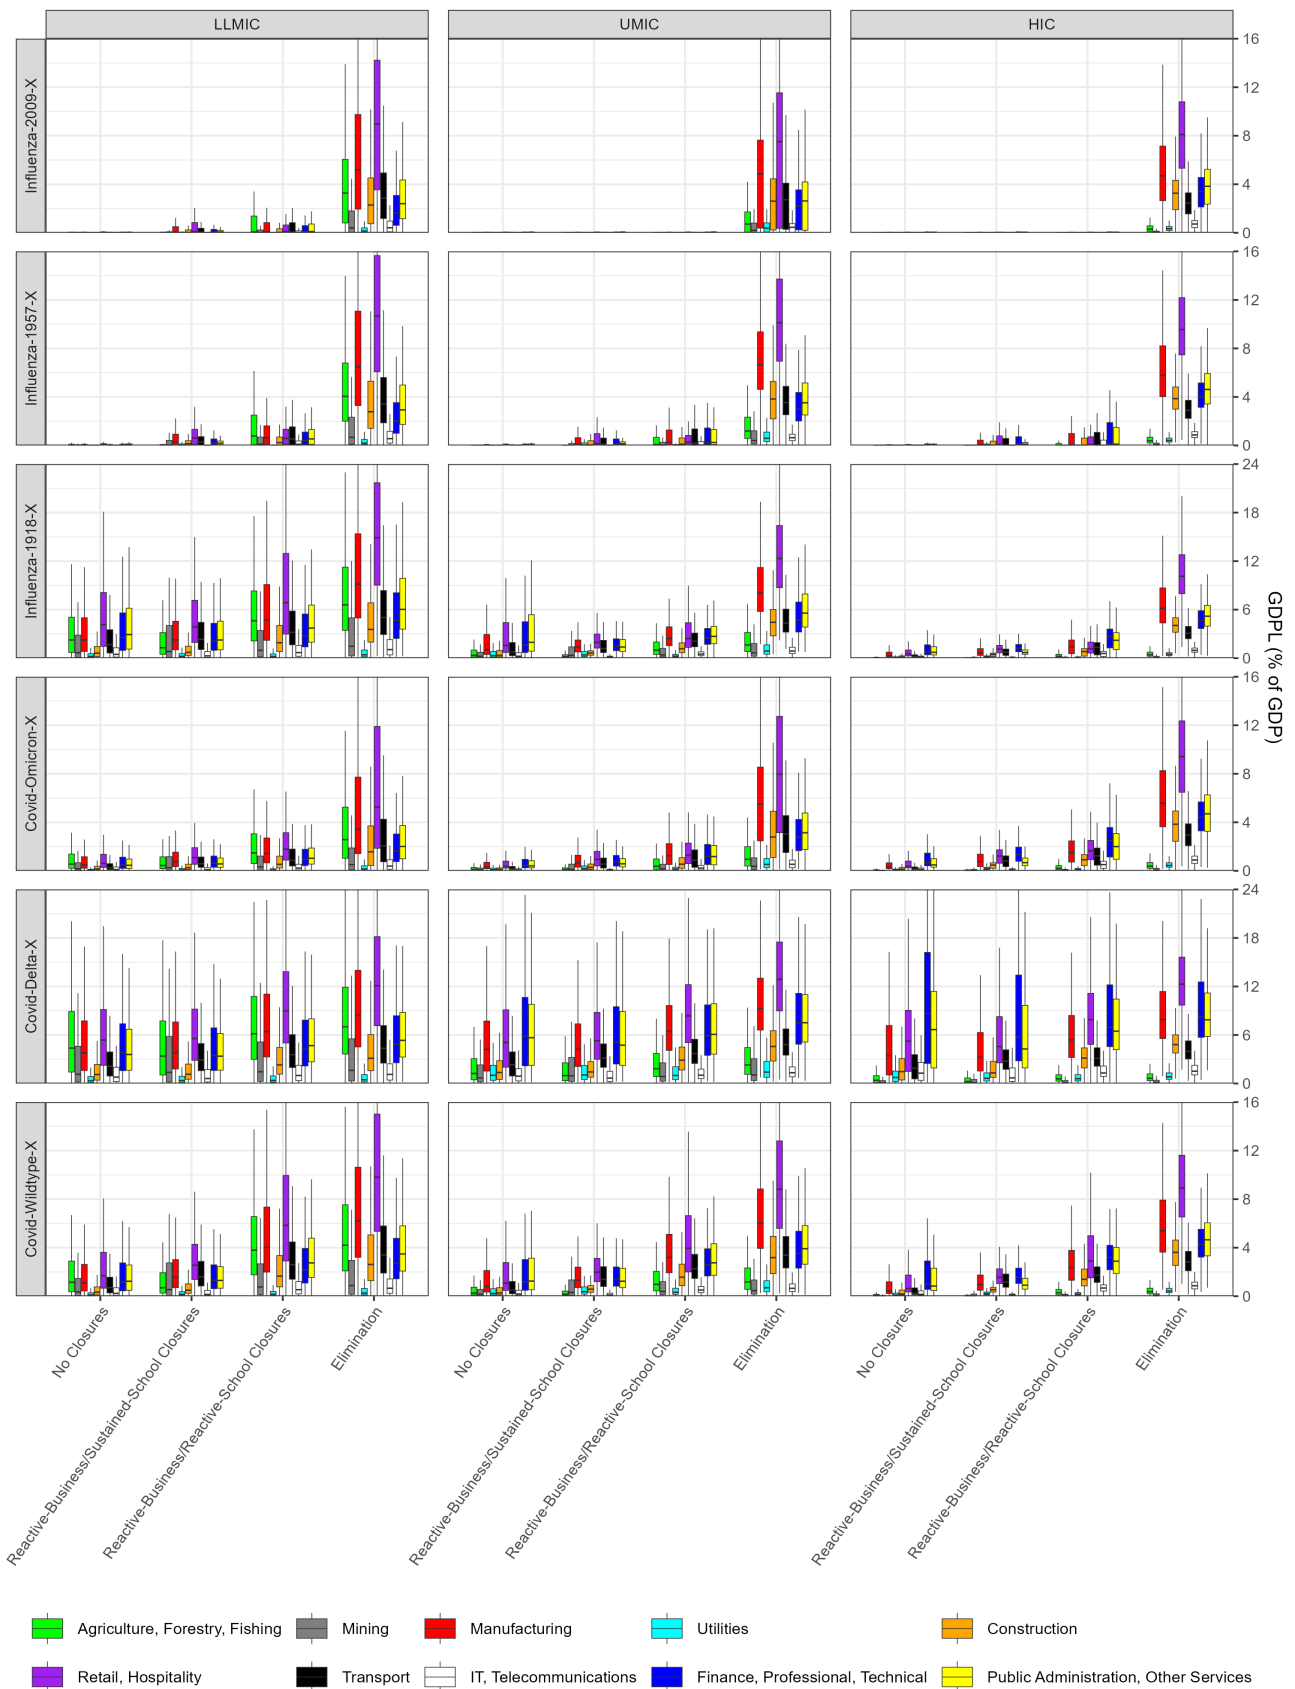

**Figure S16:** Distributional effects: distributions of projected GDP loss (GDPL) by aggregate economic sector (expressed as a percentage of annual GDP) under different closure strategies, for each disease and country-income group. Summary statistics are shown in Table S11.



| Income Group / Disease | Closure Strategy                             | Mean  | SD    | Q1    | Q2    | Q3     |
|------------------------|----------------------------------------------|-------|-------|-------|-------|--------|
| <i>LLMIC</i>           |                                              |       |       |       |       |        |
| Influenza-2009-X       | No Closures*†                                | 2.9   | 3.0   | 1.8   | 2.2   | 2.8    |
|                        | Reactive-Business/Sustained-School Closures  | 55.0  | 66.0  | 2.0   | 3.0   | 123.5  |
|                        | Reactive-Business/Reactive-School Closures   | 9.9   | 11.0  | 2.0   | 3.1   | 16.2   |
|                        | Elimination                                  | 142.6 | 68.1  | 134.1 | 160.3 | 184.7  |
| Influenza-1957-X       | No Closures*†                                | 7.6   | 10.3  | 2.6   | 3.5   | 7.2    |
|                        | Reactive-Business/Sustained-School Closures  | 86.3  | 66.7  | 3.3   | 112.5 | 140.8  |
|                        | Reactive-Business/Reactive-School Closures   | 20.6  | 21.8  | 3.3   | 15.7  | 26.6   |
|                        | Elimination                                  | 172.2 | 48.2  | 154.9 | 175.4 | 200.9  |
| Influenza-1918-X       | No Closures                                  | 595.8 | 367.8 | 224.4 | 630.6 | 890.2  |
|                        | Reactive-Business/Sustained-School Closures  | 542.2 | 294.2 | 274.5 | 503.5 | 788.9  |
|                        | Reactive-Business/Reactive-School Closures*† | 439.5 | 331.0 | 166.4 | 297.9 | 700.7  |
|                        | Elimination                                  | 824.1 | 363.6 | 527.1 | 828.4 | 1134.4 |
| Covid-Omicron-X        | No Closures*†                                | 56.2  | 44.2  | 18.1  | 42.0  | 89.9   |
|                        | Reactive-Business/Sustained-School Closures  | 94.1  | 55.7  | 48.3  | 90.5  | 132.0  |
|                        | Reactive-Business/Reactive-School Closures   | 68.0  | 41.5  | 36.7  | 58.4  | 93.0   |
|                        | Elimination                                  | 145.4 | 71.7  | 88.2  | 150.3 | 196.9  |
| Covid-Delta-X          | No Closures                                  | 316.5 | 185.0 | 166.1 | 326.1 | 431.2  |
|                        | Reactive-Business/Sustained-School Closures  | 359.6 | 163.7 | 227.2 | 356.2 | 456.1  |
|                        | Reactive-Business/Reactive-School Closures*† | 329.9 | 163.1 | 205.4 | 320.7 | 429.2  |
|                        | Elimination                                  | 395.1 | 155.3 | 276.1 | 377.1 | 488.2  |
| Covid-Wildtype-X       | No Closures*†                                | 110.8 | 81.6  | 35.0  | 104.7 | 167.4  |
|                        | Reactive-Business/Sustained-School Closures  | 179.0 | 73.0  | 133.6 | 171.9 | 222.5  |
|                        | Reactive-Business/Reactive-School Closures   | 146.8 | 78.4  | 90.3  | 138.5 | 193.2  |
|                        | Elimination                                  | 223.9 | 86.8  | 164.3 | 212.0 | 277.6  |
| <i>UMIC</i>            |                                              |       |       |       |       |        |
| Influenza-2009-X       | No Closures*†                                | 2.3   | 0.8   | 1.7   | 2.2   | 2.7    |
|                        | Reactive-Business/Sustained-School Closures  | 7.8   | 18.8  | 1.8   | 2.3   | 3.0    |
|                        | Reactive-Business/Reactive-School Closures   | 3.3   | 3.6   | 1.8   | 2.3   | 3.0    |
|                        | Elimination                                  | 75.6  | 46.5  | 5.6   | 95.0  | 109.1  |
| Influenza-1957-X       | No Closures*†                                | 7.1   | 10.2  | 3.1   | 4.3   | 6.5    |
|                        | Reactive-Business/Sustained-School Closures  | 38.4  | 38.0  | 3.6   | 7.8   | 77.8   |
|                        | Reactive-Business/Reactive-School Closures   | 11.2  | 9.1   | 3.6   | 8.7   | 17.1   |
|                        | Elimination                                  | 107.7 | 28.8  | 100.7 | 111.5 | 122.2  |
| Influenza-1918-X       | No Closures                                  | 364.4 | 330.5 | 97.9  | 205.8 | 608.5  |
|                        | Reactive-Business/Sustained-School Closures  | 247.2 | 147.9 | 152.5 | 195.6 | 299.6  |
|                        | Reactive-Business/Reactive-School Closures*† | 135.7 | 83.2  | 95.1  | 117.3 | 145.9  |
|                        | Elimination                                  | 384.9 | 229.2 | 201.7 | 308.9 | 514.4  |
| Covid-Omicron-X        | No Closures*                                 | 49.8  | 48.8  | 14.9  | 29.2  | 67.9   |
|                        | Reactive-Business/Sustained-School Closures  | 76.5  | 49.5  | 30.8  | 80.4  | 105.8  |
|                        | Reactive-Business/Reactive-School Closures†  | 50.6  | 40.3  | 23.2  | 38.7  | 65.6   |
|                        | Elimination                                  | 117.7 | 44.0  | 97.2  | 123.8 | 141.9  |
| Covid-Delta-X          | No Closures                                  | 425.2 | 293.7 | 153.0 | 404.4 | 634.9  |
|                        | Reactive-Business/Sustained-School Closures  | 422.9 | 267.4 | 191.9 | 370.5 | 608.3  |
|                        | Reactive-Business/Reactive-School Closures*† | 359.4 | 250.8 | 157.6 | 289.5 | 522.5  |
|                        | Elimination                                  | 444.8 | 227.0 | 260.8 | 410.4 | 588.3  |
| Covid-Wildtype-X       | No Closures*                                 | 124.9 | 116.9 | 31.4  | 78.4  | 194.1  |
|                        | Reactive-Business/Sustained-School Closures  | 141.5 | 87.0  | 90.3  | 116.4 | 170.4  |
|                        | Reactive-Business/Reactive-School Closures†  | 94.7  | 66.3  | 48.4  | 79.4  | 118.8  |
|                        | Elimination                                  | 166.6 | 80.3  | 113.2 | 149.7 | 207.6  |
| <i>HIC</i>             |                                              |       |       |       |       |        |
| Influenza-2009-X       | No Closures*†                                | 1.9   | 0.9   | 1.2   | 1.8   | 2.4    |
|                        | Reactive-Business/Sustained-School Closures  | 2.6   | 4.2   | 1.3   | 1.8   | 2.5    |
|                        | Reactive-Business/Reactive-School Closures   | 2.2   | 2.0   | 1.3   | 1.8   | 2.5    |
|                        | Elimination                                  | 48.9  | 23.6  | 43.0  | 55.6  | 63.5   |
| Influenza-1957-X       | No Closures*†                                | 5.5   | 7.5   | 2.7   | 4.1   | 5.9    |
|                        | Reactive-Business/Sustained-School Closures  | 14.6  | 14.5  | 3.0   | 5.3   | 30.9   |
|                        | Reactive-Business/Reactive-School Closures   | 8.2   | 6.6   | 3.0   | 5.3   | 14.0   |
|                        | Elimination                                  | 62.9  | 13.7  | 56.9  | 63.2  | 69.5   |
| Influenza-1918-X       | No Closures                                  | 143.7 | 198.5 | 44.0  | 67.4  | 117.0  |
|                        | Reactive-Business/Sustained-School Closures  | 85.8  | 60.8  | 56.6  | 74.0  | 96.1   |
|                        | Reactive-Business/Reactive-School Closures*† | 67.9  | 33.6  | 47.3  | 66.1  | 84.0   |
|                        | Elimination                                  | 118.1 | 53.9  | 89.9  | 103.8 | 125.6  |
| Covid-Omicron-X        | No Closures*                                 | 54.4  | 48.7  | 19.2  | 34.3  | 74.5   |
|                        | Reactive-Business/Sustained-School Closures  | 63.5  | 41.4  | 40.1  | 55.5  | 79.0   |
|                        | Reactive-Business/Reactive-School Closures†  | 46.7  | 34.2  | 25.0  | 36.6  | 56.8   |
|                        | Elimination                                  | 86.7  | 26.4  | 73.1  | 82.5  | 95.1   |
| Covid-Delta-X          | No Closures                                  | 431.1 | 307.1 | 127.5 | 403.5 | 681.3  |
|                        | Reactive-Business/Sustained-School Closures  | 360.1 | 274.8 | 122.3 | 257.3 | 571.9  |
|                        | Reactive-Business/Reactive-School Closures*  | 288.4 | 230.2 | 112.1 | 188.2 | 429.6  |
|                        | Elimination†                                 | 309.8 | 213.2 | 136.6 | 235.5 | 428.7  |
| Covid-Wildtype-X       | No Closures*                                 | 96.2  | 100.5 | 27.6  | 48.6  | 135.5  |

continued on next page

continued from previous page

| Income Group / Disease | Closure Strategy                                   | Mean | SD   | Q <sub>1</sub> | Q <sub>2</sub> | Q <sub>3</sub> |
|------------------------|----------------------------------------------------|------|------|----------------|----------------|----------------|
|                        | <b>Reactive-Business/Sustained-School Closures</b> | 77.8 | 59.4 | 46.5           | 61.5           | 87.3           |
|                        | <b>Reactive-Business/Reactive-School Closures†</b> | 56.4 | 34.8 | 34.7           | 49.5           | 70.2           |
|                        | Elimination                                        | 90.0 | 35.6 | 71.0           | 82.7           | 100.4          |

**Table S5:** Summary statistics of projected socioeconomic losses (expressed as a percentage of annual GDP) under different closure strategies, for each disease and country-income group. The closure strategies with the two lowest means (bold), lowest median (\*) and lowest upper quartile (†) are indicated. Distributions are shown in main text Figure 2.

| Income Group / Disease | Closure Strategy                            | Mean  | SD    | Q1    | Q2    | Q3    |
|------------------------|---------------------------------------------|-------|-------|-------|-------|-------|
| <i>LLMIC</i>           |                                             |       |       |       |       |       |
| Influenza-2009-X       | No Closures                                 | 2.3   | 2.7   | 1.3   | 1.6   | 2.1   |
|                        | Reactive-Business/Sustained-School Closures | 1.6   | 0.9   | 1.2   | 1.5   | 1.8   |
|                        | Reactive-Business/Reactive-School Closures  | 1.5   | 0.5   | 1.2   | 1.4   | 1.7   |
| Influenza-1957-X       | Elimination                                 | 1.9   | 2.6   | 1.0   | 1.3   | 1.8   |
|                        | No Closures                                 | 6.4   | 9.3   | 1.9   | 2.7   | 6.0   |
|                        | Reactive-Business/Sustained-School Closures | 3.3   | 4.3   | 1.7   | 2.2   | 3.1   |
| Influenza-1918-X       | Reactive-Business/Reactive-School Closures  | 2.4   | 2.1   | 1.6   | 2.0   | 2.6   |
|                        | Elimination                                 | 5.5   | 9.1   | 1.3   | 2.0   | 4.4   |
|                        | No Closures                                 | 552.2 | 340.7 | 207.9 | 583.3 | 823.0 |
| Covid-Omicron-X        | Reactive-Business/Sustained-School Closures | 388.6 | 264.3 | 135.1 | 345.7 | 603.4 |
|                        | Reactive-Business/Reactive-School Closures  | 320.3 | 276.9 | 91.4  | 182.4 | 532.7 |
|                        | Elimination                                 | 612.3 | 335.4 | 335.3 | 613.8 | 895.6 |
| Covid-Delta-X          | No Closures                                 | 48.8  | 39.6  | 15.1  | 36.0  | 77.5  |
|                        | Reactive-Business/Sustained-School Closures | 41.8  | 37.5  | 11.6  | 26.9  | 65.5  |
|                        | Reactive-Business/Reactive-School Closures  | 35.5  | 34.4  | 9.7   | 20.8  | 51.8  |
| Covid-Wildtype-X       | Elimination                                 | 37.6  | 35.2  | 9.9   | 24.0  | 56.2  |
|                        | No Closures                                 | 274.5 | 165.7 | 140.7 | 275.5 | 374.1 |
|                        | Reactive-Business/Sustained-School Closures | 241.0 | 165.5 | 92.0  | 234.6 | 343.7 |
| Covid-Delta-X          | Reactive-Business/Reactive-School Closures  | 213.4 | 157.5 | 71.3  | 196.5 | 316.1 |
|                        | Elimination                                 | 228.9 | 156.2 | 96.3  | 218.4 | 326.9 |
|                        | No Closures                                 | 95.2  | 72.2  | 29.6  | 88.3  | 142.9 |
| Covid-Wildtype-X       | Reactive-Business/Sustained-School Closures | 70.0  | 64.3  | 17.7  | 46.8  | 109.6 |
|                        | Reactive-Business/Reactive-School Closures  | 49.5  | 50.0  | 13.4  | 28.2  | 71.2  |
|                        | Elimination                                 | 73.0  | 62.8  | 19.3  | 57.9  | 109.7 |
| <i>UMIC</i>            |                                             |       |       |       |       |       |
| Influenza-2009-X       | No Closures                                 | 1.9   | 0.8   | 1.4   | 1.7   | 2.3   |
|                        | Reactive-Business/Sustained-School Closures | 1.8   | 0.7   | 1.3   | 1.7   | 2.2   |
|                        | Reactive-Business/Reactive-School Closures  | 1.8   | 0.7   | 1.3   | 1.7   | 2.2   |
| Influenza-1957-X       | Elimination                                 | 1.6   | 0.7   | 1.1   | 1.4   | 1.9   |
|                        | No Closures                                 | 6.3   | 9.7   | 2.6   | 3.7   | 5.8   |
|                        | Reactive-Business/Sustained-School Closures | 3.8   | 2.4   | 2.4   | 3.3   | 4.5   |
| Influenza-1918-X       | Reactive-Business/Reactive-School Closures  | 3.6   | 1.7   | 2.4   | 3.3   | 4.4   |
|                        | Elimination                                 | 3.5   | 4.8   | 1.8   | 2.6   | 3.8   |
|                        | No Closures                                 | 342.4 | 310.4 | 91.9  | 193.4 | 571.8 |
| Covid-Omicron-X        | Reactive-Business/Sustained-School Closures | 166.7 | 133.5 | 81.5  | 112.4 | 208.0 |
|                        | Reactive-Business/Reactive-School Closures  | 100.6 | 69.3  | 72.6  | 85.3  | 100.0 |
|                        | Elimination                                 | 260.1 | 215.9 | 85.6  | 185.9 | 380.0 |
| Covid-Delta-X          | No Closures                                 | 45.2  | 45.2  | 12.8  | 26.4  | 61.9  |
|                        | Reactive-Business/Sustained-School Closures | 38.2  | 40.8  | 11.7  | 20.7  | 48.4  |
|                        | Reactive-Business/Reactive-School Closures  | 32.2  | 35.4  | 10.8  | 17.9  | 37.5  |
| Covid-Wildtype-X       | Elimination                                 | 33.7  | 36.1  | 10.3  | 19.5  | 42.4  |
|                        | No Closures                                 | 386.7 | 270.1 | 138.7 | 363.5 | 574.9 |
|                        | Reactive-Business/Sustained-School Closures | 333.4 | 261.3 | 103.4 | 273.8 | 509.0 |
| Covid-Delta-X          | Reactive-Business/Reactive-School Closures  | 280.5 | 238.8 | 81.6  | 203.1 | 426.2 |
|                        | Elimination                                 | 323.7 | 228.3 | 138.8 | 283.1 | 463.6 |
|                        | No Closures                                 | 113.2 | 107.1 | 28.0  | 71.0  | 175.6 |
| Covid-Wildtype-X       | Reactive-Business/Sustained-School Closures | 73.0  | 81.2  | 19.9  | 39.1  | 92.0  |
|                        | Reactive-Business/Reactive-School Closures  | 46.6  | 50.6  | 17.1  | 28.4  | 52.2  |
|                        | Elimination                                 | 74.6  | 68.6  | 23.2  | 51.3  | 105.1 |
| <i>HIC</i>             |                                             |       |       |       |       |       |
| Influenza-2009-X       | No Closures                                 | 1.6   | 0.8   | 1.0   | 1.5   | 2.1   |
|                        | Reactive-Business/Sustained-School Closures | 1.6   | 0.8   | 1.0   | 1.5   | 2.1   |
|                        | Reactive-Business/Reactive-School Closures  | 1.6   | 0.8   | 1.0   | 1.5   | 2.1   |
| Influenza-1957-X       | Elimination                                 | 1.2   | 0.7   | 0.7   | 1.0   | 1.5   |
|                        | No Closures                                 | 5.0   | 7.2   | 2.3   | 3.6   | 5.4   |
|                        | Reactive-Business/Sustained-School Closures | 3.4   | 1.8   | 2.2   | 3.2   | 4.4   |
| Influenza-1918-X       | Reactive-Business/Reactive-School Closures  | 3.5   | 1.8   | 2.2   | 3.4   | 4.7   |
|                        | Elimination                                 | 2.4   | 1.4   | 1.4   | 2.2   | 3.1   |
|                        | No Closures                                 | 135.6 | 187.1 | 41.8  | 63.7  | 110.5 |
| Covid-Omicron-X        | Reactive-Business/Sustained-School Closures | 60.2  | 54.4  | 34.1  | 49.0  | 68.7  |
|                        | Reactive-Business/Reactive-School Closures  | 53.8  | 29.1  | 37.0  | 52.4  | 67.6  |
|                        | Elimination                                 | 53.3  | 50.4  | 28.0  | 39.3  | 57.8  |
| Covid-Delta-X          | No Closures                                 | 50.0  | 45.2  | 17.4  | 31.5  | 68.8  |
|                        | Reactive-Business/Sustained-School Closures | 39.4  | 37.7  | 15.4  | 23.6  | 49.4  |
|                        | Reactive-Business/Reactive-School Closures  | 31.5  | 30.1  | 14.0  | 20.3  | 36.6  |
| Covid-Wildtype-X       | Elimination                                 | 27.9  | 29.8  | 11.3  | 16.9  | 31.1  |
|                        | No Closures                                 | 393.8 | 281.0 | 118.4 | 367.2 | 618.3 |
|                        | Reactive-Business/Sustained-School Closures | 302.2 | 254.7 | 82.5  | 204.7 | 492.3 |
| Covid-Delta-X          | Reactive-Business/Reactive-School Closures  | 233.3 | 212.8 | 70.2  | 136.1 | 359.0 |
|                        | Elimination                                 | 228.9 | 203.7 | 64.9  | 157.4 | 336.6 |
|                        | No Closures                                 | 87.9  | 92.0  | 25.2  | 44.7  | 123.6 |
| Covid-Wildtype-X       | Reactive-Business/Sustained-School Closures | 47.2  | 51.8  | 18.9  | 29.4  | 51.9  |
|                        | Reactive-Business/Reactive-School Closures  | 31.3  | 25.7  | 17.5  | 25.3  | 36.2  |
|                        | Elimination                                 | 33.3  | 32.6  | 13.6  | 22.2  | 41.1  |

**Table S6:** Summary statistics of projected VLYL (expressed as a percentage of annual GDP) under different closure strategies, for each disease and country-income group. Distributions are shown in Figure S7.

| Income Group / Disease | Closure Strategy                            | Mean | SD   | Q <sub>1</sub> | Q <sub>2</sub> | Q <sub>3</sub> |
|------------------------|---------------------------------------------|------|------|----------------|----------------|----------------|
| <i>LLMIC</i>           |                                             |      |      |                |                |                |
| Influenza-2009-X       | No Closures                                 | 0.3  | 0.2  | 0.2            | 0.3            | 0.3            |
|                        | Reactive-Business/Sustained-School Closures | 3.4  | 6.3  | 0.2            | 0.4            | 4.9            |
|                        | Reactive-Business/Reactive-School Closures  | 5.3  | 7.2  | 0.2            | 0.4            | 9.5            |
| Influenza-1957-X       | Elimination                                 | 37.3 | 19.4 | 30.4           | 40.9           | 50.0           |
|                        | No Closures                                 | 0.8  | 0.8  | 0.4            | 0.5            | 0.8            |
|                        | Reactive-Business/Sustained-School Closures | 5.4  | 7.2  | 0.5            | 4.3            | 6.9            |
| Influenza-1918-X       | Reactive-Business/Reactive-School Closures  | 9.2  | 8.9  | 0.5            | 7.0            | 15.0           |
|                        | Elimination                                 | 44.3 | 14.9 | 36.9           | 45.0           | 53.5           |
|                        | No Closures                                 | 30.3 | 19.9 | 10.6           | 31.0           | 45.7           |
| Covid-Omicron-X        | Reactive-Business/Sustained-School Closures | 28.9 | 18.3 | 13.9           | 26.3           | 41.3           |
|                        | Reactive-Business/Reactive-School Closures  | 45.0 | 23.3 | 27.2           | 41.8           | 61.9           |
|                        | Elimination                                 | 70.8 | 20.4 | 55.3           | 70.8           | 86.0           |
| Covid-Delta-X          | No Closures                                 | 6.4  | 4.6  | 2.2            | 4.9            | 11.0           |
|                        | Reactive-Business/Sustained-School Closures | 8.7  | 6.1  | 4.6            | 7.7            | 12.1           |
|                        | Reactive-Business/Reactive-School Closures  | 14.2 | 8.7  | 7.9            | 13.3           | 18.1           |
| Covid-Wildtype-X       | Elimination                                 | 32.1 | 20.2 | 13.7           | 32.2           | 48.4           |
|                        | No Closures                                 | 40.9 | 20.7 | 21.8           | 46.8           | 57.3           |
|                        | Reactive-Business/Sustained-School Closures | 41.9 | 19.7 | 24.3           | 45.9           | 57.3           |
| Covid-Wildtype-X       | Reactive-Business/Reactive-School Closures  | 55.2 | 18.6 | 43.3           | 56.8           | 67.0           |
|                        | Elimination                                 | 66.4 | 17.9 | 54.4           | 64.2           | 77.6           |
|                        | No Closures                                 | 14.7 | 9.9  | 4.8            | 14.8           | 23.5           |
| Covid-Wildtype-X       | Reactive-Business/Sustained-School Closures | 18.3 | 10.8 | 10.4           | 16.7           | 24.9           |
|                        | Reactive-Business/Reactive-School Closures  | 35.0 | 15.1 | 24.6           | 34.7           | 44.9           |
|                        | Elimination                                 | 47.1 | 16.4 | 35.8           | 46.8           | 58.0           |
| <i>UMIC</i>            |                                             |      |      |                |                |                |
| Influenza-2009-X       | No Closures                                 | 0.2  | 0.1  | 0.2            | 0.2            | 0.3            |
|                        | Reactive-Business/Sustained-School Closures | 0.7  | 1.6  | 0.2            | 0.2            | 0.3            |
|                        | Reactive-Business/Reactive-School Closures  | 1.1  | 3.0  | 0.2            | 0.2            | 0.3            |
| Influenza-1957-X       | Elimination                                 | 26.6 | 17.3 | 2.4            | 32.2           | 39.4           |
|                        | No Closures                                 | 0.5  | 0.5  | 0.3            | 0.4            | 0.5            |
|                        | Reactive-Business/Sustained-School Closures | 3.2  | 3.7  | 0.4            | 0.7            | 5.2            |
| Influenza-1918-X       | Reactive-Business/Reactive-School Closures  | 5.4  | 5.9  | 0.4            | 2.0            | 10.8           |
|                        | Elimination                                 | 37.5 | 11.5 | 33.0           | 38.5           | 44.3           |
|                        | No Closures                                 | 16.8 | 15.8 | 4.4            | 9.1            | 28.3           |
| Covid-Omicron-X        | Reactive-Business/Sustained-School Closures | 13.3 | 7.8  | 8.1            | 11.2           | 16.3           |
|                        | Reactive-Business/Reactive-School Closures  | 19.8 | 9.3  | 14.1           | 18.2           | 24.4           |
|                        | Elimination                                 | 49.8 | 12.0 | 41.0           | 48.5           | 57.6           |
| Covid-Delta-X          | No Closures                                 | 4.0  | 3.6  | 1.5            | 2.3            | 5.2            |
|                        | Reactive-Business/Sustained-School Closures | 6.6  | 4.5  | 2.8            | 6.1            | 9.1            |
|                        | Reactive-Business/Reactive-School Closures  | 10.4 | 7.6  | 4.1            | 9.5            | 15.0           |
| Covid-Wildtype-X       | Elimination                                 | 32.0 | 16.4 | 16.4           | 37.1           | 44.5           |
|                        | No Closures                                 | 37.8 | 24.5 | 12.8           | 39.0           | 59.3           |
|                        | Reactive-Business/Sustained-School Closures | 38.2 | 21.7 | 18.6           | 35.1           | 56.7           |
| Covid-Wildtype-X       | Reactive-Business/Reactive-School Closures  | 47.0 | 20.3 | 31.0           | 46.5           | 63.3           |
|                        | Elimination                                 | 61.6 | 15.6 | 50.4           | 61.3           | 72.4           |
|                        | No Closures                                 | 11.2 | 10.0 | 2.9            | 6.8            | 18.3           |
| Covid-Wildtype-X       | Reactive-Business/Sustained-School Closures | 13.3 | 8.2  | 7.7            | 11.1           | 17.3           |
|                        | Reactive-Business/Reactive-School Closures  | 23.3 | 11.8 | 15.1           | 22.0           | 30.9           |
|                        | Elimination                                 | 37.4 | 13.1 | 28.7           | 38.6           | 46.3           |
| <i>HIC</i>             |                                             |      |      |                |                |                |
| Influenza-2009-X       | No Closures                                 | 0.2  | 0.1  | 0.1            | 0.2            | 0.2            |
|                        | Reactive-Business/Sustained-School Closures | 0.3  | 0.7  | 0.1            | 0.2            | 0.2            |
|                        | Reactive-Business/Reactive-School Closures  | 0.5  | 1.7  | 0.1            | 0.2            | 0.2            |
| Influenza-1957-X       | Elimination                                 | 27.8 | 14.4 | 23.2           | 31.3           | 36.8           |
|                        | No Closures                                 | 0.4  | 0.3  | 0.3            | 0.4            | 0.5            |
|                        | Reactive-Business/Sustained-School Closures | 2.1  | 2.4  | 0.3            | 0.4            | 4.3            |
| Influenza-1918-X       | Reactive-Business/Reactive-School Closures  | 4.2  | 5.4  | 0.3            | 0.4            | 9.3            |
|                        | Elimination                                 | 35.3 | 9.1  | 30.9           | 35.3           | 39.8           |
|                        | No Closures                                 | 7.1  | 10.3 | 1.8            | 3.1            | 5.9            |
| Covid-Omicron-X        | Reactive-Business/Sustained-School Closures | 6.5  | 4.1  | 4.2            | 6.2            | 8.0            |
|                        | Reactive-Business/Reactive-School Closures  | 11.9 | 7.3  | 4.9            | 12.7           | 15.5           |
|                        | Elimination                                 | 38.5 | 7.9  | 33.6           | 37.8           | 42.5           |
| Covid-Delta-X          | No Closures                                 | 4.1  | 3.7  | 1.6            | 2.4            | 5.2            |
|                        | Reactive-Business/Sustained-School Closures | 7.0  | 4.0  | 4.3            | 7.0            | 9.0            |
|                        | Reactive-Business/Reactive-School Closures  | 12.1 | 7.4  | 6.3            | 13.0           | 16.7           |
| Covid-Wildtype-X       | Elimination                                 | 35.2 | 12.0 | 29.0           | 37.2           | 42.3           |
|                        | No Closures                                 | 37.0 | 26.7 | 9.3            | 35.8           | 61.6           |
|                        | Reactive-Business/Sustained-School Closures | 34.2 | 23.2 | 14.5           | 25.1           | 54.6           |
| Covid-Wildtype-X       | Reactive-Business/Reactive-School Closures  | 42.6 | 20.8 | 27.8           | 39.2           | 57.9           |
|                        | Elimination                                 | 55.3 | 15.7 | 43.0           | 51.6           | 65.9           |
|                        | No Closures                                 | 8.0  | 8.7  | 2.3            | 3.7            | 11.0           |
| Covid-Wildtype-X       | Reactive-Business/Sustained-School Closures | 9.4  | 6.0  | 6.2            | 8.3            | 11.3           |
|                        | Reactive-Business/Reactive-School Closures  | 17.9 | 9.7  | 13.1           | 17.6           | 23.6           |
|                        | Elimination                                 | 34.3 | 10.0 | 29.1           | 35.0           | 40.0           |

**Table S7:** Summary statistics of projected GDPL (expressed as a percentage of annual GDP) under different closure strategies, for each disease and country-income group. Distributions are shown in Figure S8.

| Income Group / Disease | Closure Strategy                            | Mean  | SD   | Q1    | Q2    | Q3    |
|------------------------|---------------------------------------------|-------|------|-------|-------|-------|
| <i>LLMIC</i>           |                                             |       |      |       |       |       |
| Influenza-2009-X       | No Closures                                 | 0.3   | 0.1  | 0.3   | 0.3   | 0.4   |
|                        | Reactive-Business/Sustained-School Closures | 50.0  | 61.9 | 0.3   | 0.4   | 115.6 |
|                        | Reactive-Business/Reactive-School Closures  | 3.1   | 5.2  | 0.3   | 0.4   | 4.1   |
| Influenza-1957-X       | Elimination                                 | 103.5 | 49.7 | 98.4  | 116.8 | 133.9 |
|                        | No Closures                                 | 0.4   | 0.2  | 0.3   | 0.4   | 0.4   |
|                        | Reactive-Business/Sustained-School Closures | 77.6  | 61.8 | 0.4   | 104.0 | 128.5 |
| Influenza-1918-X       | Reactive-Business/Reactive-School Closures  | 8.9   | 13.7 | 0.4   | 4.5   | 9.7   |
|                        | Elimination                                 | 122.4 | 33.2 | 112.4 | 125.2 | 141.8 |
|                        | No Closures                                 | 13.3  | 8.0  | 5.1   | 14.4  | 19.9  |
| Covid-Omicron-X        | Reactive-Business/Sustained-School Closures | 124.7 | 38.3 | 112.5 | 130.5 | 149.9 |
|                        | Reactive-Business/Reactive-School Closures  | 74.2  | 43.9 | 39.4  | 75.9  | 108.0 |
|                        | Elimination                                 | 141.0 | 20.9 | 126.0 | 139.3 | 157.1 |
| Covid-Delta-X          | No Closures                                 | 1.0   | 0.1  | 0.9   | 1.0   | 1.1   |
|                        | Reactive-Business/Sustained-School Closures | 43.6  | 50.2 | 4.2   | 14.6  | 89.0  |
|                        | Reactive-Business/Reactive-School Closures  | 18.3  | 18.6 | 5.6   | 12.1  | 24.2  |
| Covid-Wildtype-X       | Elimination                                 | 75.7  | 58.5 | 8.0   | 93.9  | 128.2 |
|                        | No Closures                                 | 1.1   | 0.1  | 1.0   | 1.1   | 1.2   |
|                        | Reactive-Business/Sustained-School Closures | 76.6  | 54.4 | 9.2   | 88.7  | 123.4 |
| Covid-Delta-X          | Reactive-Business/Reactive-School Closures  | 61.2  | 43.2 | 20.8  | 58.5  | 93.7  |
|                        | Elimination                                 | 99.9  | 52.7 | 49.2  | 120.6 | 137.4 |
|                        | No Closures                                 | 0.8   | 0.1  | 0.7   | 0.8   | 0.9   |
| Covid-Wildtype-X       | Reactive-Business/Sustained-School Closures | 90.7  | 48.4 | 52.6  | 104.4 | 126.4 |
|                        | Reactive-Business/Reactive-School Closures  | 62.3  | 35.5 | 32.9  | 60.6  | 88.4  |
|                        | Elimination                                 | 103.8 | 39.5 | 77.7  | 113.5 | 131.3 |
| <i>UMIC</i>            |                                             |       |      |       |       |       |
| Influenza-2009-X       | No Closures                                 | 0.2   | 0.0  | 0.2   | 0.2   | 0.2   |
|                        | Reactive-Business/Sustained-School Closures | 5.3   | 17.4 | 0.2   | 0.2   | 0.2   |
|                        | Reactive-Business/Reactive-School Closures  | 0.4   | 0.6  | 0.2   | 0.2   | 0.2   |
| Influenza-1957-X       | Elimination                                 | 47.4  | 29.9 | 1.7   | 60.6  | 69.0  |
|                        | No Closures                                 | 0.2   | 0.1  | 0.2   | 0.2   | 0.2   |
|                        | Reactive-Business/Sustained-School Closures | 31.5  | 34.4 | 0.2   | 1.3   | 67.9  |
| Influenza-1918-X       | Reactive-Business/Reactive-School Closures  | 2.1   | 3.6  | 0.2   | 1.7   | 2.7   |
|                        | Elimination                                 | 66.7  | 17.7 | 63.4  | 69.5  | 75.6  |
|                        | No Closures                                 | 5.2   | 4.5  | 1.5   | 3.1   | 8.7   |
| Covid-Omicron-X        | Reactive-Business/Sustained-School Closures | 67.2  | 20.6 | 64.3  | 71.9  | 78.3  |
|                        | Reactive-Business/Reactive-School Closures  | 15.3  | 13.9 | 3.5   | 11.1  | 23.0  |
|                        | Elimination                                 | 75.0  | 9.3  | 68.5  | 74.5  | 80.6  |
| Covid-Delta-X          | No Closures                                 | 0.6   | 0.1  | 0.5   | 0.6   | 0.6   |
|                        | Reactive-Business/Sustained-School Closures | 31.7  | 32.9 | 1.8   | 6.2   | 67.4  |
|                        | Reactive-Business/Reactive-School Closures  | 8.0   | 10.0 | 2.3   | 4.9   | 9.2   |
| Covid-Wildtype-X       | Elimination                                 | 52.0  | 30.8 | 20.1  | 68.0  | 75.1  |
|                        | No Closures                                 | 0.7   | 0.1  | 0.6   | 0.7   | 0.7   |
|                        | Reactive-Business/Sustained-School Closures | 51.4  | 30.5 | 18.8  | 65.7  | 75.0  |
| Covid-Delta-X          | Reactive-Business/Reactive-School Closures  | 31.9  | 22.7 | 11.2  | 30.0  | 48.5  |
|                        | Elimination                                 | 59.5  | 27.0 | 57.7  | 70.2  | 76.6  |
|                        | No Closures                                 | 0.5   | 0.1  | 0.4   | 0.5   | 0.5   |
| Covid-Wildtype-X       | Reactive-Business/Sustained-School Closures | 55.2  | 26.0 | 46.6  | 64.9  | 72.4  |
|                        | Reactive-Business/Reactive-School Closures  | 24.8  | 18.0 | 10.4  | 21.0  | 37.0  |
|                        | Elimination                                 | 54.6  | 21.8 | 37.4  | 62.3  | 70.7  |
| <i>HIC</i>             |                                             |       |      |       |       |       |
| Influenza-2009-X       | No Closures                                 | 0.1   | 0.0  | 0.1   | 0.1   | 0.1   |
|                        | Reactive-Business/Sustained-School Closures | 0.6   | 3.5  | 0.1   | 0.1   | 0.1   |
|                        | Reactive-Business/Reactive-School Closures  | 0.1   | 0.1  | 0.1   | 0.1   | 0.1   |
| Influenza-1957-X       | Elimination                                 | 19.9  | 9.9  | 17.7  | 23.1  | 26.0  |
|                        | No Closures                                 | 0.1   | 0.0  | 0.1   | 0.1   | 0.1   |
|                        | Reactive-Business/Sustained-School Closures | 9.1   | 11.9 | 0.1   | 0.1   | 22.9  |
| Influenza-1918-X       | Reactive-Business/Reactive-School Closures  | 0.5   | 0.8  | 0.1   | 0.1   | 0.9   |
|                        | Elimination                                 | 25.3  | 5.4  | 23.3  | 25.5  | 27.7  |
|                        | No Closures                                 | 1.0   | 1.2  | 0.3   | 0.5   | 0.9   |
| Covid-Omicron-X        | Reactive-Business/Sustained-School Closures | 19.1  | 11.5 | 0.7   | 24.2  | 26.7  |
|                        | Reactive-Business/Reactive-School Closures  | 2.2   | 2.7  | 0.7   | 1.2   | 2.4   |
|                        | Elimination                                 | 26.4  | 3.9  | 24.1  | 26.1  | 28.3  |
| Covid-Delta-X          | No Closures                                 | 0.2   | 0.0  | 0.2   | 0.2   | 0.3   |
|                        | Reactive-Business/Sustained-School Closures | 17.2  | 12.7 | 1.3   | 24.2  | 27.2  |
|                        | Reactive-Business/Reactive-School Closures  | 3.1   | 2.6  | 1.7   | 2.7   | 3.8   |
| Covid-Wildtype-X       | Elimination                                 | 23.5  | 9.0  | 21.9  | 26.3  | 28.9  |
|                        | No Closures                                 | 0.3   | 0.1  | 0.2   | 0.3   | 0.3   |
|                        | Reactive-Business/Sustained-School Closures | 23.7  | 9.3  | 23.8  | 26.4  | 28.6  |
| Covid-Delta-X          | Reactive-Business/Reactive-School Closures  | 12.5  | 7.8  | 5.6   | 12.0  | 19.0  |
|                        | Elimination                                 | 25.6  | 6.8  | 24.4  | 26.7  | 29.1  |
|                        | No Closures                                 | 0.2   | 0.1  | 0.2   | 0.2   | 0.2   |
| Covid-Wildtype-X       | Reactive-Business/Sustained-School Closures | 21.2  | 9.4  | 21.3  | 24.0  | 26.2  |
|                        | Reactive-Business/Reactive-School Closures  | 7.1   | 5.8  | 2.5   | 5.8   | 11.2  |
|                        | Elimination                                 | 22.5  | 6.9  | 20.2  | 24.0  | 26.7  |

**Table S8:** Summary statistics of projected VSYL (expressed as a percentage of annual GDP) under different closure strategies, for each disease and country-income group. Distributions are shown in Figure S9.

| Income Group / Disease | Closure Strategy                             | Decremental VLYL     | Incremental GDPL + VSYL |
|------------------------|----------------------------------------------|----------------------|-------------------------|
| <i>LLMIC</i>           |                                              |                      |                         |
| Influenza-2009-X       | No Closures*†                                | 0.0 (0.0; 0.0)       | 0.0 (0.0; 0.0)          |
|                        | Reactive-Business/Sustained-School Closures  | 0.7 (0.0; 0.4)       | 52.7 (0.0; 121.5)       |
|                        | Reactive-Business/Reactive-School Closures   | 0.8 (0.0; 0.4)       | 7.8 (0.0; 14.3)         |
|                        | Elimination                                  | 0.4 (0.0; 0.7)       | 140.1 (132.0; 182.0)    |
| Influenza-1957-X       | No Closures*†                                | 0.0 (0.0; 0.0)       | 0.0 (0.0; 0.0)          |
|                        | Reactive-Business/Sustained-School Closures  | 3.1 (0.0; 2.9)       | 81.8 (0.0; 135.7)       |
|                        | Reactive-Business/Reactive-School Closures   | 4.0 (0.0; 3.5)       | 17.0 (0.0; 23.0)        |
|                        | Elimination                                  | 0.9 (-0.0; 1.8)      | 165.6 (150.6; 192.1)    |
| Influenza-1918-X       | No Closures                                  | 0.0 (0.0; 0.0)       | 0.0 (0.0; 0.0)          |
|                        | Reactive-Business/Sustained-School Closures  | 163.5 (6.5; 303.9)   | 109.9 (91.9; 137.2)     |
|                        | Reactive-Business/Reactive-School Closures*† | 231.8 (12.4; 419.3)  | 75.5 (34.8; 112.1)      |
|                        | Elimination                                  | -60.1 (-232.7; 89.2) | 168.1 (146.1; 190.2)    |
| Covid-Omicron-X        | No Closures*†                                | 0.0 (0.0; 0.0)       | 0.0 (0.0; 0.0)          |
|                        | Reactive-Business/Sustained-School Closures  | 7.0 (1.3; 9.6)       | 44.9 (2.9; 92.6)        |
|                        | Reactive-Business/Reactive-School Closures   | 13.3 (3.4; 19.2)     | 25.1 (4.9; 34.8)        |
|                        | Elimination                                  | 11.2 (2.7; 19.3)     | 100.4 (7.5; 171.6)      |
| Covid-Delta-X          | No Closures                                  | 0.0 (0.0; 0.0)       | 0.0 (0.0; 0.0)          |
|                        | Reactive-Business/Sustained-School Closures  | 33.5 (4.8; 60.2)     | 76.6 (5.9; 124.0)       |
|                        | Reactive-Business/Reactive-School Closures*† | 61.0 (15.9; 102.0)   | 74.5 (23.3; 118.6)      |
|                        | Elimination                                  | 45.6 (10.8; 89.7)    | 124.3 (55.5; 175.5)     |
| Covid-Wildtype-X       | No Closures*†                                | 0.0 (0.0; 0.0)       | 0.0 (0.0; 0.0)          |
|                        | Reactive-Business/Sustained-School Closures  | 25.2 (3.4; 41.5)     | 93.5 (53.7; 131.1)      |
|                        | Reactive-Business/Reactive-School Closures   | 45.7 (11.2; 72.5)    | 81.8 (45.0; 115.1)      |
|                        | Elimination                                  | 22.2 (-1.0; 53.1)    | 135.4 (99.6; 172.7)     |
| <i>UMIC</i>            |                                              |                      |                         |
| Influenza-2009-X       | No Closures*†                                | 0.0 (0.0; 0.0)       | 0.0 (0.0; 0.0)          |
|                        | Reactive-Business/Sustained-School Closures  | 0.0 (0.0; 0.0)       | 5.6 (0.0; 0.0)          |
|                        | Reactive-Business/Reactive-School Closures   | 0.0 (0.0; 0.0)       | 1.1 (0.0; 0.0)          |
|                        | Elimination                                  | 0.3 (0.0; 0.5)       | 73.6 (3.8; 107.3)       |
| Influenza-1957-X       | No Closures*†                                | 0.0 (0.0; 0.0)       | 0.0 (0.0; 0.0)          |
|                        | Reactive-Business/Sustained-School Closures  | 2.6 (0.0; 1.2)       | 33.9 (0.0; 73.2)        |
|                        | Reactive-Business/Reactive-School Closures   | 2.7 (0.0; 1.0)       | 6.8 (0.0; 12.9)         |
|                        | Elimination                                  | 2.8 (0.1; 2.1)       | 103.4 (97.1; 117.8)     |
| Influenza-1918-X       | No Closures                                  | 0.0 (0.0; 0.0)       | 0.0 (0.0; 0.0)          |
|                        | Reactive-Business/Sustained-School Closures  | 175.7 (0.0; 344.7)   | 58.4 (45.3; 75.7)       |
|                        | Reactive-Business/Reactive-School Closures*† | 241.8 (5.5; 448.4)   | 13.1 (1.5; 20.8)        |
|                        | Elimination                                  | 82.3 (-56.1; 222.9)  | 102.9 (90.1; 116.2)     |
| Covid-Omicron-X        | No Closures*                                 | 0.0 (0.0; 0.0)       | 0.0 (0.0; 0.0)          |
|                        | Reactive-Business/Sustained-School Closures  | 7.0 (0.0; 9.8)       | 33.7 (1.0; 72.1)        |
|                        | Reactive-Business/Reactive-School Closures†  | 13.0 (0.5; 19.3)     | 13.8 (1.4; 19.4)        |
|                        | Elimination                                  | 11.5 (1.3; 20.6)     | 79.4 (31.1; 115.7)      |
| Covid-Delta-X          | No Closures                                  | 0.0 (0.0; 0.0)       | 0.0 (0.0; 0.0)          |
|                        | Reactive-Business/Sustained-School Closures  | 53.4 (6.6; 95.3)     | 51.1 (5.4; 76.9)        |
|                        | Reactive-Business/Reactive-School Closures*† | 106.2 (24.0; 177.4)  | 40.5 (8.4; 66.9)        |
|                        | Elimination                                  | 63.0 (-9.3; 160.6)   | 82.6 (64.3; 113.5)      |
| Covid-Wildtype-X       | No Closures*                                 | 0.0 (0.0; 0.0)       | 0.0 (0.0; 0.0)          |
|                        | Reactive-Business/Sustained-School Closures  | 40.1 (3.2; 65.7)     | 56.8 (46.4; 76.2)       |
|                        | Reactive-Business/Reactive-School Closures†  | 66.6 (6.3; 115.3)    | 36.5 (16.6; 52.9)       |
|                        | Elimination                                  | 38.6 (-5.2; 90.6)    | 80.3 (50.7; 105.6)      |
| <i>HIC</i>             |                                              |                      |                         |
| Influenza-2009-X       | No Closures*†                                | 0.0 (0.0; 0.0)       | 0.0 (0.0; 0.0)          |
|                        | Reactive-Business/Sustained-School Closures  | 0.0 (0.0; 0.0)       | 0.7 (0.0; 0.0)          |
|                        | Reactive-Business/Reactive-School Closures   | 0.0 (0.0; 0.0)       | 0.3 (0.0; 0.0)          |
|                        | Elimination                                  | 0.4 (0.0; 0.7)       | 47.4 (41.4; 62.4)       |
| Influenza-1957-X       | No Closures*†                                | 0.0 (0.0; 0.0)       | 0.0 (0.0; 0.0)          |
|                        | Reactive-Business/Sustained-School Closures  | 1.5 (0.0; 0.6)       | 10.7 (0.0; 26.9)        |
|                        | Reactive-Business/Reactive-School Closures   | 1.4 (0.0; 0.4)       | 4.2 (0.0; 9.9)          |
|                        | Elimination                                  | 2.6 (0.3; 2.5)       | 60.1 (54.0; 66.9)       |
| Influenza-1918-X       | No Closures                                  | 0.0 (0.0; 0.0)       | 0.0 (0.0; 0.0)          |
|                        | Reactive-Business/Sustained-School Closures  | 75.4 (0.0; 42.8)     | 17.5 (0.0; 29.3)        |
|                        | Reactive-Business/Reactive-School Closures*† | 81.8 (0.0; 42.3)     | 6.0 (0.0; 11.9)         |
|                        | Elimination                                  | 82.3 (3.2; 48.2)     | 56.8 (50.2; 65.2)       |
| Covid-Omicron-X        | No Closures*                                 | 0.0 (0.0; 0.0)       | 0.0 (0.0; 0.0)          |
|                        | Reactive-Business/Sustained-School Closures  | 10.7 (0.7; 16.5)     | 19.8 (0.6; 31.9)        |
|                        | Reactive-Business/Reactive-School Closures†  | 18.6 (1.3; 29.6)     | 10.9 (3.9; 15.4)        |
|                        | Elimination                                  | 22.1 (3.9; 35.0)     | 54.4 (47.7; 68.0)       |
| Covid-Delta-X          | No Closures                                  | 0.0 (0.0; 0.0)       | 0.0 (0.0; 0.0)          |
|                        | Reactive-Business/Sustained-School Closures  | 91.6 (17.6; 147.7)   | 20.6 (12.4; 30.4)       |
|                        | Reactive-Business/Reactive-School Closures*  | 160.5 (34.5; 261.5)  | 17.8 (2.2; 30.9)        |
|                        | Elimination†                                 | 164.9 (33.1; 271.0)  | 43.6 (27.4; 60.7)       |

continued on next page

continued from previous page

| <b>Income Group / Disease</b> | <b>Closure Strategy</b>                             | <b>Decremental VLYL</b> | <b>Incremental GDPL + VSYL</b> |
|-------------------------------|-----------------------------------------------------|-------------------------|--------------------------------|
| Covid-Wildtype-X              | No Closures*                                        | 0.0 (0.0; 0.0)          | 0.0 (0.0; 0.0)                 |
|                               | <b>Reactive-Business/Sustained-School Closures</b>  | 40.7 (2.0; 65.3)        | 22.3 (17.3; 29.9)              |
|                               | <b>Reactive-Business/Reactive-School Closures</b> † | 56.7 (2.4; 89.7)        | 16.8 (10.4; 23.2)              |
|                               | Elimination                                         | 54.7 (6.2; 85.7)        | 48.5 (35.0; 61.0)              |

**Table S9:** Summary statistics (mean, (IQR)) of projected decremental VSYL and incremental GDPL + VSYL (expressed as a percentage of annual GDP) of switching from the No Closures strategy to alternative closure strategies, for each disease and country-income group. The closure strategies with the two lowest mean socioeconomic losses (bold), lowest median (\*) and lowest upper quartile (†) are indicated. Distributions are shown in main text Figure 3.

| Income Group / Disease | Closure Strategy                                                                                                        | Preschool-Age                                                                  | School-Age                                                                    | Working-Age                                                                            | Retired-Age                                                                   |
|------------------------|-------------------------------------------------------------------------------------------------------------------------|--------------------------------------------------------------------------------|-------------------------------------------------------------------------------|----------------------------------------------------------------------------------------|-------------------------------------------------------------------------------|
| <b>LLMIC</b>           |                                                                                                                         |                                                                                |                                                                               |                                                                                        |                                                                               |
| Influenza-2009-X       | No Closures<br>Reactive-Business/Sustained-School Closures                                                              | 0.3 (0.2; 0.4)<br>0.3 (0.2; 0.4)                                               | 0.4 (0.3; 0.6)<br>0.4 (0.3; 0.5)                                              | 0.7 (0.5; 0.9)<br>0.6 (0.5; 0.8)                                                       | 0.2 (0.1; 0.3)<br>0.2 (0.1; 0.2)                                              |
| Influenza-1957-X       | Reactive-Business/Reactive-School Closures<br>Elimination<br>Reactive-Business/Sustained-School Closures                | 0.3 (0.2; 0.3)<br>0.3 (0.2; 0.4)<br>0.2 (0.1; 0.3)<br>0.1 (0.1; 0.2)           | 0.4 (0.3; 0.4)<br>0.3 (0.2; 0.5)<br>0.5 (0.4; 1.1)<br>0.4 (0.3; 0.5)          | 0.6 (0.4; 0.7)<br>0.5 (0.3; 0.8)<br>1.5 (1.0; 3.3)<br>1.2 (0.9; 1.8)                   | 0.1 (0.1; 0.2)<br>0.1 (0.1; 0.2)<br>0.5 (0.3; 1.3)<br>0.4 (0.3; 0.7)          |
| Influenza-1918-X       | Reactive-Business/Reactive-School Closures<br>Elimination<br>No Closures<br>Reactive-Business/Sustained-School Closures | 0.1 (0.1; 0.2)<br>0.2 (0.1; 0.3)<br>146.8 (56.1; 227.6)<br>109.3 (44.2; 179.1) | 0.4 (0.3; 0.5)<br>0.4 (0.3; 0.7)<br>135.4 (47.5; 189.1)<br>67.6 (26.7; 120.7) | 1.1 (0.8; 1.5)<br>1.1 (0.7; 2.4)<br>267.4 (96.4; 393.1)<br>150.8 (59.7; 287.3)         | 0.4 (0.3; 0.6)<br>0.4 (0.2; 1.0)<br>4.4 (1.7; 7.9)<br>2.8 (1.1; 5.6)          |
| Covid-Omicron-X        | Reactive-Business/Reactive-School Closures<br>Elimination<br>No Closures<br>Reactive-Business/Sustained-School Closures | 64.1 (29.5; 165.0)<br>220.1 (139.7; 289.0)<br>0.1 (0.1; 0.1)<br>0.1 (0.1; 0.1) | 34.9 (20.5; 111.7)<br>121.6 (54.5; 186.3)<br>3.0 (1.9; 3.5)<br>2.5 (1.4; 3.3) | 74.0 (40.3; 236.8)<br>253.4 (111.8; 402.2)<br>28.8 (10.4; 68.5)<br>20.6 (8.0; 57.0)    | 1.6 (0.7; 4.6)<br>4.6 (1.8; 8.4)<br>3.4 (1.9; 5.4)<br>3.1 (1.8; 5.0)          |
| Covid-Delta-X          | Reactive-Business/Reactive-School Closures<br>Elimination<br>No Closures<br>Reactive-Business/Sustained-School Closures | 0.1 (0.1; 0.1)<br>0.1 (0.1; 0.1)<br>0.1 (0.1; 0.1)<br>0.1 (0.1; 0.1)           | 2.2 (1.1; 3.0)<br>2.3 (1.2; 3.1)<br>4.2 (3.4; 4.7)<br>3.5 (2.4; 4.3)          | 15.1 (6.5; 43.4)<br>17.9 (6.7; 48.2)<br>253.1 (123.0; 342.0)<br>213.0 (76.3; 313.7)    | 2.8 (1.6; 4.7)<br>3.0 (1.6; 4.9)<br>18.2 (11.4; 28.1)<br>16.8 (9.8; 26.9)     |
| Covid-Wildtype-X       | Reactive-Business/Reactive-School Closures<br>Elimination<br>No Closures<br>Reactive-Business/Sustained-School Closures | 0.1 (0.1; 0.1)<br>0.1 (0.1; 0.1)<br>0.0 (0.0; 0.1)<br>0.0 (0.0; 0.1)           | 3.2 (2.1; 4.0)<br>3.3 (2.2; 4.1)<br>1.8 (1.2; 2.2)<br>1.2 (0.7; 1.7)          | 176.6 (97.8; 288.1)<br>197.1 (83.3; 295.6)<br>79.8 (23.9; 132.0)<br>39.8 (14.1; 99.5)  | 15.7 (9.3; 25.7)<br>16.7 (9.9; 26.5)<br>5.8 (3.4; 9.4)<br>4.6 (2.6; 7.8)      |
| <b>UMIC</b>            |                                                                                                                         |                                                                                |                                                                               |                                                                                        |                                                                               |
| Influenza-2009-X       | Reactive-Business/Reactive-School Closures<br>Elimination<br>No Closures<br>Reactive-Business/Sustained-School Closures | 0.1 (0.1; 0.1)<br>0.1 (0.1; 0.2)<br>0.1 (0.1; 0.2)<br>0.1 (0.1; 0.1)           | 0.3 (0.2; 0.3)<br>0.3 (0.2; 0.3)<br>0.3 (0.2; 0.3)<br>0.2 (0.2; 0.3)          | 0.8 (0.6; 1.0)<br>0.8 (0.6; 1.0)<br>0.8 (0.6; 1.0)<br>0.6 (0.5; 0.9)                   | 0.5 (0.3; 0.8)<br>0.5 (0.3; 0.8)<br>0.5 (0.3; 0.8)<br>0.4 (0.2; 0.6)          |
| Influenza-1957-X       | Reactive-Business/Reactive-School Closures<br>Elimination<br>No Closures<br>Reactive-Business/Sustained-School Closures | 0.1 (0.1; 0.1)<br>0.1 (0.1; 0.1)<br>0.1 (0.1; 0.1)<br>0.1 (0.1; 0.1)           | 0.3 (0.2; 0.3)<br>0.3 (0.2; 0.3)<br>0.3 (0.2; 0.3)<br>0.3 (0.2; 0.3)          | 1.8 (1.3; 2.4)<br>1.8 (1.3; 2.3)<br>1.4 (1.0; 2.0)<br>117.1 (54.6; 351.0)              | 1.1 (0.7; 1.8)<br>1.1 (0.7; 1.8)<br>0.9 (0.5; 1.6)<br>6.0 (2.5; 15.7)         |
| Influenza-1918-X       | Reactive-Business/Reactive-School Closures<br>Elimination<br>No Closures<br>Reactive-Business/Sustained-School Closures | 15.6 (12.3; 21.4)<br>48.3 (22.6; 95.8)<br>0.1 (0.1; 0.1)<br>0.1 (0.1; 0.1)     | 15.6 (12.8; 18.7)<br>26.4 (12.6; 58.6)<br>1.3 (0.7; 2.3)<br>0.9 (0.6; 1.8)    | 50.2 (40.2; 62.3)<br>98.8 (45.4; 209.8)<br>15.9 (7.7; 43.2)<br>11.8 (7.1; 31.3)        | 2.6 (1.5; 4.4)<br>4.5 (1.9; 10.3)<br>7.8 (3.9; 15.1)<br>6.9 (3.6; 13.4)       |
| Covid-Omicron-X        | Reactive-Business/Reactive-School Closures<br>Elimination<br>No Closures<br>Reactive-Business/Sustained-School Closures | 0.1 (0.1; 0.1)<br>0.1 (0.1; 0.1)<br>0.1 (0.1; 0.1)<br>0.1 (0.1; 0.1)           | 0.8 (0.6; 1.5)<br>0.8 (0.5; 1.6)<br>2.9 (2.0; 3.5)<br>2.1 (1.3; 2.9)          | 9.9 (6.6; 22.7)<br>11.1 (6.2; 26.9)<br>309.6 (101.1; 493.8)<br>221.3 (73.4; 433.3)     | 6.2 (3.3; 11.9)<br>6.5 (3.2; 12.7)<br>49.2 (26.7; 87.2)<br>44.2 (23.0; 80.7)  |
| Covid-Delta-X          | Reactive-Business/Reactive-School Closures<br>Elimination<br>No Closures<br>Reactive-Business/Sustained-School Closures | 0.1 (0.1; 0.1)<br>0.1 (0.1; 0.1)<br>0.0 (0.0; 0.0)<br>0.0 (0.0; 0.0)           | 1.9 (1.1; 2.6)<br>2.1 (1.4; 2.7)<br>1.0 (0.5; 1.5)<br>0.5 (0.3; 0.9)          | 151.1 (56.1; 356.3)<br>234.0 (106.2; 385.5)<br>52.3 (19.7; 149.3)<br>27.2 (14.1; 70.7) | 39.0 (20.5; 72.9)<br>43.7 (23.7; 78.0)<br>13.8 (6.6; 27.1)<br>9.9 (5.0; 19.7) |

continued on next page

continued from previous page

| Income Group // Disease | Closure Strategy                            | Preschool-Age   | School-Age      | Working-Age         | Retired-Age        |
|-------------------------|---------------------------------------------|-----------------|-----------------|---------------------|--------------------|
|                         | Reactive-Business/Reactive-School Closures  | 0.0 (0.0; 0.0)  | 0.4 (0.3; 0.6)  | 19.4 (12.3; 35.9)   | 7.9 (4.2; 14.6)    |
|                         | Elimination                                 | 0.0 (0.0; 0.0)  | 0.6 (0.4; 0.9)  | 37.8 (16.4; 83.1)   | 11.0 (5.3; 21.3)   |
| <i>H1C</i>              |                                             |                 |                 |                     |                    |
| Influenza-2009-X        | No Closures                                 | 0.1 (0.0; 0.1)  | 0.2 (0.1; 0.2)  | 0.7 (0.5; 0.9)      | 0.6 (0.3; 1.0)     |
|                         | Reactive-Business/Sustained-School Closures | 0.1 (0.0; 0.1)  | 0.1 (0.1; 0.2)  | 0.7 (0.5; 0.9)      | 0.6 (0.3; 1.0)     |
|                         | Reactive-Business/Reactive-School Closures  | 0.1 (0.0; 0.1)  | 0.1 (0.1; 0.2)  | 0.7 (0.5; 0.9)      | 0.6 (0.3; 1.0)     |
|                         | Elimination                                 | 0.1 (0.0; 0.1)  | 0.1 (0.1; 0.1)  | 0.4 (0.3; 0.6)      | 0.4 (0.2; 0.7)     |
| Influenza-1957-X        | No Closures                                 | 0.0 (0.0; 0.0)  | 0.2 (0.1; 0.2)  | 1.8 (1.3; 2.5)      | 1.6 (0.8; 2.7)     |
|                         | Reactive-Business/Sustained-School Closures | 0.0 (0.0; 0.0)  | 0.1 (0.1; 0.2)  | 1.6 (1.2; 2.1)      | 1.4 (0.7; 2.2)     |
|                         | Reactive-Business/Reactive-School Closures  | 0.0 (0.0; 0.0)  | 0.2 (0.1; 0.2)  | 1.7 (1.2; 2.2)      | 1.4 (0.7; 2.3)     |
|                         | Elimination                                 | 0.0 (0.0; 0.0)  | 0.1 (0.1; 0.1)  | 1.1 (0.7; 1.5)      | 0.9 (0.5; 1.5)     |
| Influenza-1918-X        | No Closures                                 | 7.9 (5.7; 12.9) | 9.6 (5.7; 16.5) | 41.6 (26.0; 75.7)   | 3.7 (1.6; 7.6)     |
|                         | Reactive-Business/Sustained-School Closures | 7.7 (5.5; 11.0) | 6.2 (3.9; 9.0)  | 31.0 (20.7; 45.1)   | 2.6 (1.1; 4.5)     |
|                         | Reactive-Business/Reactive-School Closures  | 7.0 (5.3; 9.1)  | 7.8 (4.7; 10.3) | 33.1 (22.5; 44.0)   | 2.8 (1.2; 4.8)     |
|                         | Elimination                                 | 8.1 (5.7; 12.3) | 4.6 (3.0; 7.1)  | 24.0 (16.4; 36.4)   | 1.9 (0.9; 3.5)     |
| Covid-Omicron-X         | No Closures                                 | 0.0 (0.0; 0.1)  | 0.9 (0.4; 1.5)  | 16.3 (8.5; 41.3)    | 12.9 (6.8; 25.3)   |
|                         | Reactive-Business/Sustained-School Closures | 0.0 (0.0; 0.1)  | 0.5 (0.4; 1.0)  | 11.4 (7.7; 26.4)    | 11.2 (6.0; 20.8)   |
|                         | Reactive-Business/Reactive-School Closures  | 0.0 (0.0; 0.0)  | 0.5 (0.4; 0.8)  | 9.3 (7.3; 18.0)     | 9.8 (5.4; 17.1)    |
|                         | Elimination                                 | 0.0 (0.0; 0.1)  | 0.4 (0.3; 0.6)  | 7.8 (5.9; 15.3)     | 8.2 (4.3; 14.6)    |
| Covid-Delta-X           | No Closures                                 | 0.0 (0.0; 0.0)  | 1.8 (0.9; 2.3)  | 292.7 (73.6; 498.0) | 69.5 (31.5; 126.7) |
|                         | Reactive-Business/Sustained-School Closures | 0.0 (0.0; 0.0)  | 1.0 (0.5; 1.6)  | 140.9 (49.4; 392.9) | 53.4 (26.1; 107.9) |
|                         | Reactive-Business/Reactive-School Closures  | 0.0 (0.0; 0.0)  | 0.8 (0.5; 1.4)  | 85.2 (42.4; 272.4)  | 43.8 (22.2; 88.3)  |
|                         | Elimination                                 | 0.0 (0.0; 0.0)  | 0.8 (0.4; 1.3)  | 106.5 (38.9; 257.0) | 42.1 (20.3; 82.8)  |
| Covid-Wildtype-X        | No Closures                                 | 0.0 (0.0; 0.0)  | 0.4 (0.2; 0.8)  | 28.4 (16.0; 89.4)   | 14.6 (7.1; 31.0)   |
|                         | Reactive-Business/Sustained-School Closures | 0.0 (0.0; 0.0)  | 0.2 (0.1; 0.3)  | 17.8 (12.4; 32.1)   | 10.4 (5.3; 18.9)   |
|                         | Reactive-Business/Reactive-School Closures  | 0.0 (0.0; 0.0)  | 0.2 (0.2; 0.3)  | 15.6 (11.6; 21.3)   | 9.2 (4.8; 14.9)    |
|                         | Elimination                                 | 0.0 (0.0; 0.0)  | 0.2 (0.1; 0.3)  | 13.7 (8.8; 25.4)    | 7.8 (3.8; 14.7)    |

**Table S10:** Summary statistics (median, (IQR)) of projected VLYL by age-group (expressed as a percentage of annual GDP) under different closure strategies, for each disease and country-income group. Distributions are shown in Figure S15.

| Income Group / Disease           | Closure Strategy                            | AFF                | MIN               | MAN                | UTL               | CON               | RTH                 | TRA               | ICT               | PFT               | PAO               |
|----------------------------------|---------------------------------------------|--------------------|-------------------|--------------------|-------------------|-------------------|---------------------|-------------------|-------------------|-------------------|-------------------|
| Influenza-2009-X<br><i>LLMTC</i> | No Closures                                 | 0.0<br>(0.0; 0.0)  | 0.0<br>(0.0; 0.0) | 0.0<br>(0.0; 0.0)  | 0.0<br>(0.0; 0.0) | 0.0<br>(0.0; 0.0) | 0.0<br>(0.0; 0.1)   | 0.0<br>(0.0; 0.0) | 0.0<br>(0.0; 0.0) | 0.0<br>(0.0; 0.1) | 0.0<br>(0.0; 0.1) |
|                                  | Reactive-Business/Sustained-School Closures | 0.0<br>(0.0; 0.0)  | 0.0<br>(0.0; 0.1) | 0.1<br>(0.0; 0.5)  | 0.0<br>(0.0; 0.1) | 0.0<br>(0.0; 0.2) | 0.1<br>(0.0; 0.8)   | 0.0<br>(0.0; 0.4) | 0.0<br>(0.0; 0.0) | 0.1<br>(0.0; 0.3) | 0.1<br>(0.0; 0.2) |
|                                  | Reactive-Business/Reactive-School Closures  | 0.1<br>(0.0; 1.4)  | 0.0<br>(0.0; 0.2) | 0.1<br>(0.0; 0.8)  | 0.0<br>(0.0; 0.0) | 0.0<br>(0.0; 0.3) | 0.1<br>(0.0; 0.6)   | 0.1<br>(0.0; 0.8) | 0.1<br>(0.0; 0.4) | 0.1<br>(0.0; 0.2) | 0.1<br>(0.0; 0.6) |
| Influenza-1957-X                 | Elimination                                 | 3.3<br>(0.8; 6.1)  | 0.4<br>(0.0; 1.8) | 5.2<br>(1.9; 9.8)  | 0.1<br>(0.0; 0.4) | 2.3<br>(0.8; 4.5) | 9.0<br>(3.5; 14.2)  | 2.9<br>(1.2; 4.9) | 0.1<br>(0.0; 1.0) | 1.6<br>(0.6; 3.1) | 2.4<br>(1.2; 4.4) |
|                                  | No Closures                                 | 0.0<br>(0.0; 0.1)  | 0.0<br>(0.0; 0.1) | 0.1<br>(0.0; 0.1)  | 0.0<br>(0.0; 0.0) | 0.0<br>(0.0; 0.0) | 0.1<br>(0.1; 0.2)   | 0.0<br>(0.0; 0.1) | 0.0<br>(0.0; 0.0) | 0.1<br>(0.0; 0.1) | 0.1<br>(0.0; 0.1) |
|                                  | Reactive-Business/Sustained-School Closures | 0.0<br>(0.0; 0.1)  | 0.0<br>(0.0; 0.4) | 0.3<br>(0.1; 0.9)  | 0.0<br>(0.0; 0.1) | 0.2<br>(0.0; 0.4) | 0.6<br>(0.1; 1.3)   | 0.3<br>(0.0; 0.7) | 0.0<br>(0.0; 0.0) | 0.2<br>(0.1; 0.5) | 0.2<br>(0.1; 0.4) |
| Influenza-1918-X                 | Reactive-Business/Reactive-School Closures  | 0.8<br>(0.1; 2.5)  | 0.1<br>(0.0; 0.7) | 0.6<br>(0.1; 1.6)  | 0.0<br>(0.0; 0.0) | 0.2<br>(0.0; 0.7) | 0.6<br>(0.1; 1.3)   | 0.5<br>(0.1; 1.5) | 0.1<br>(0.0; 0.4) | 0.4<br>(0.1; 1.1) | 0.5<br>(0.1; 1.3) |
|                                  | Elimination                                 | 4.1<br>(2.0; 6.8)  | 0.7<br>(0.1; 2.3) | 6.5<br>(3.3; 11.1) | 0.2<br>(0.1; 0.5) | 2.8<br>(1.4; 5.3) | 10.7<br>(6.1; 15.7) | 3.4<br>(1.9; 5.6) | 0.6<br>(0.2; 1.2) | 2.0<br>(1.0; 3.5) | 2.9<br>(1.7; 5.0) |
|                                  | No Closures                                 | 2.3<br>(0.7; 5.1)  | 0.7<br>(0.1; 2.8) | 2.2<br>(0.8; 5.0)  | 0.2<br>(0.1; 0.6) | 0.6<br>(0.2; 1.4) | 4.1<br>(1.5; 8.1)   | 1.7<br>(0.6; 3.5) | 0.5<br>(0.1; 1.3) | 2.5<br>(1.0; 5.6) | 2.9<br>(1.1; 6.2) |
| Covid-Omicron-X                  | Reactive-Business/Sustained-School Closures | 1.3<br>(0.5; 3.2)  | 0.8<br>(0.1; 4.0) | 2.3<br>(1.0; 4.6)  | 0.2<br>(0.1; 0.6) | 0.7<br>(0.3; 1.5) | 3.9<br>(1.9; 7.2)   | 2.3<br>(1.1; 4.4) | 0.3<br>(0.1; 0.8) | 2.1<br>(0.9; 4.3) | 2.2<br>(1.0; 4.6) |
|                                  | Reactive-Business/Reactive-School Closures  | 4.6<br>(2.1; 8.3)  | 1.0<br>(0.2; 3.4) | 4.7<br>(2.2; 9.1)  | 0.2<br>(0.1; 0.5) | 1.9<br>(0.8; 4.0) | 6.9<br>(3.0; 13.0)  | 3.2<br>(1.7; 5.8) | 0.7<br>(0.2; 1.6) | 2.8<br>(1.4; 5.5) | 3.7<br>(2.0; 6.6) |
|                                  | Elimination                                 | 6.6<br>(3.4; 11.3) | 1.5<br>(0.3; 5.0) | 9.2<br>(5.0; 15.4) | 0.4<br>(0.2; 1.0) | 3.6<br>(2.0; 6.8) | 14.9<br>(9.0; 21.7) | 5.0<br>(2.9; 8.4) | 1.1<br>(0.4; 2.3) | 4.7<br>(2.4; 8.1) | 6.0<br>(3.6; 9.9) |
| Covid-Delta-X                    | No Closures                                 | 0.6<br>(0.2; 1.4)  | 0.2<br>(0.0; 0.7) | 0.5<br>(0.2; 1.2)  | 0.0<br>(0.0; 0.1) | 0.2<br>(0.1; 0.4) | 0.6<br>(0.3; 1.4)   | 0.3<br>(0.1; 0.6) | 0.1<br>(0.0; 0.3) | 0.5<br>(0.2; 1.1) | 0.5<br>(0.2; 1.0) |
|                                  | Reactive-Business/Sustained-School Closures | 0.4<br>(0.2; 1.2)  | 0.3<br>(0.0; 1.2) | 0.7<br>(0.3; 1.5)  | 0.1<br>(0.0; 0.2) | 0.3<br>(0.1; 0.5) | 1.1<br>(0.5; 1.9)   | 0.6<br>(0.3; 1.1) | 0.1<br>(0.0; 0.3) | 0.6<br>(0.3; 1.2) | 0.6<br>(0.3; 1.1) |
|                                  | Reactive-Business/Reactive-School Closures  | 1.5<br>(0.6; 3.1)  | 0.3<br>(0.1; 1.2) | 1.4<br>(0.7; 2.7)  | 0.1<br>(0.0; 0.2) | 0.5<br>(0.2; 1.2) | 1.8<br>(0.9; 3.1)   | 0.9<br>(0.4; 1.8) | 0.2<br>(0.1; 0.5) | 0.9<br>(0.4; 1.8) | 1.0<br>(0.6; 1.9) |
| Covid-Wildtype-X                 | Elimination                                 | 2.6<br>(1.0; 5.3)  | 0.5<br>(0.1; 1.9) | 3.4<br>(1.4; 7.7)  | 0.2<br>(0.1; 0.4) | 1.6<br>(0.4; 3.7) | 5.3<br>(1.9; 11.9)  | 2.1<br>(0.7; 4.3) | 0.4<br>(0.1; 0.9) | 1.6<br>(0.8; 3.0) | 2.0<br>(1.0; 3.7) |
|                                  | No Closures                                 | 4.4<br>(1.4; 8.9)  | 1.1<br>(0.2; 4.6) | 3.8<br>(1.6; 7.7)  | 0.3<br>(0.1; 0.9) | 1.1<br>(0.4; 2.4) | 5.4<br>(2.3; 9.2)   | 2.1<br>(0.9; 3.9) | 0.8<br>(0.2; 2.0) | 3.8<br>(1.6; 7.4) | 3.6<br>(1.6; 6.7) |
|                                  | Reactive-Business/Sustained-School Closures | 3.4<br>(1.1; 7.7)  | 1.4<br>(0.2; 5.8) | 3.8<br>(1.8; 7.6)  | 0.4<br>(0.1; 0.9) | 1.2<br>(0.5; 2.4) | 5.6<br>(2.9; 9.2)   | 2.9<br>(1.6; 4.9) | 0.6<br>(0.2; 1.7) | 3.5<br>(1.6; 6.9) | 3.4<br>(1.7; 6.2) |
| Covid-Wildtype-X                 | Reactive-Business/Reactive-School Closures  | 6.1<br>(3.0; 10.8) | 1.5<br>(0.3; 5.1) | 6.4<br>(3.3; 11.1) | 0.4<br>(0.1; 0.9) | 2.3<br>(1.2; 4.5) | 9.0<br>(5.0; 13.8)  | 3.6<br>(2.0; 6.0) | 1.0<br>(0.4; 2.3) | 4.3<br>(2.2; 7.8) | 4.7<br>(2.7; 8.0) |
|                                  | Elimination                                 | 7.0<br>(3.6; 11.9) | 1.6<br>(0.3; 5.5) | 8.4<br>(4.5; 14.0) | 0.5<br>(0.2; 1.1) | 3.1<br>(1.6; 6.1) | 12.1<br>(7.2; 18.2) | 4.4<br>(2.5; 7.2) | 1.1<br>(0.4; 2.4) | 4.8<br>(2.6; 8.4) | 5.3<br>(3.3; 8.8) |
|                                  | No Closures                                 | 1.2<br>(0.4; 2.9)  | 0.3<br>(0.1; 1.5) | 1.1<br>(0.4; 2.6)  | 0.1<br>(0.0; 0.3) | 0.3<br>(0.1; 0.8) | 1.7<br>(0.7; 3.6)   | 0.7<br>(0.3; 1.6) | 0.2<br>(0.1; 0.7) | 1.2<br>(0.4; 2.7) | 1.2<br>(0.5; 2.6) |
| <i>UMTC</i>                      | Reactive-Business/Sustained-School Closures | 0.7<br>(0.3; 1.9)  | 0.5<br>(0.1; 2.7) | 1.5<br>(0.7; 3.0)  | 0.2<br>(0.1; 0.4) | 0.5<br>(0.2; 1.0) | 2.6<br>(1.4; 4.3)   | 1.6<br>(0.8; 2.9) | 0.1<br>(0.0; 0.5) | 1.3<br>(0.6; 2.6) | 1.3<br>(0.7; 2.4) |
|                                  | Reactive-Business/Reactive-School Closures  | 3.8<br>(1.8; 6.6)  | 0.8<br>(0.1; 2.7) | 4.0<br>(2.0; 7.3)  | 0.2<br>(0.1; 0.4) | 1.7<br>(0.8; 3.4) | 5.9<br>(2.9; 10.0)  | 2.6<br>(1.4; 4.5) | 0.5<br>(0.2; 1.2) | 2.2<br>(1.1; 3.9) | 2.7<br>(1.5; 4.8) |
|                                  | Elimination                                 | 4.2<br>(2.1; 7.5)  | 0.9<br>(0.2; 3.0) | 6.2<br>(3.2; 10.6) | 0.3<br>(0.1; 0.6) | 2.6<br>(1.3; 5.0) | 9.8<br>(5.3; 15.0)  | 3.4<br>(1.9; 5.8) | 0.7<br>(0.2; 1.4) | 3.5<br>(1.4; 4.8) | 3.5<br>(2.1; 5.8) |
| Influenza-2009-X                 | No Closures                                 | 0.0<br>(0.0; 0.0)  | 0.0<br>(0.0; 0.0) | 0.0<br>(0.0; 0.0)  | 0.0<br>(0.0; 0.0) | 0.0<br>(0.0; 0.0) | 0.0<br>(0.0; 0.1)   | 0.0<br>(0.0; 0.0) | 0.0<br>(0.0; 0.0) | 0.0<br>(0.0; 0.1) | 0.0<br>(0.0; 0.1) |
|                                  | Reactive-Business/Sustained-School Closures | 0.0<br>(0.0; 0.0)  | 0.0<br>(0.0; 0.0) | 0.0<br>(0.0; 0.0)  | 0.0<br>(0.0; 0.0) | 0.0<br>(0.0; 0.0) | 0.0<br>(0.0; 0.1)   | 0.0<br>(0.0; 0.0) | 0.0<br>(0.0; 0.0) | 0.0<br>(0.0; 0.1) | 0.0<br>(0.0; 0.1) |
|                                  | Reactive-Business/Reactive-School Closures  | 0.0<br>(0.0; 0.0)  | 0.0<br>(0.0; 0.0) | 0.0<br>(0.0; 0.0)  | 0.0<br>(0.0; 0.0) | 0.0<br>(0.0; 0.0) | 0.0<br>(0.0; 0.1)   | 0.0<br>(0.0; 0.0) | 0.0<br>(0.0; 0.0) | 0.0<br>(0.0; 0.1) | 0.1<br>(0.0; 0.1) |
| Influenza-1957-X                 | Elimination                                 | 0.7<br>(0.1; 1.7)  | 0.2<br>(0.0; 0.8) | 4.8<br>(0.4; 7.6)  | 0.4<br>(0.1; 0.8) | 2.6<br>(0.2; 4.4) | 7.5<br>(0.4; 11.5)  | 2.7<br>(0.3; 4.1) | 0.5<br>(0.0; 0.8) | 2.2<br>(0.2; 3.5) | 2.6<br>(0.2; 4.2) |
|                                  | No Closures                                 | 0.0<br>(0.0; 0.0)  | 0.0<br>(0.0; 0.0) | 0.0<br>(0.0; 0.1)  | 0.0<br>(0.0; 0.0) | 0.0<br>(0.0; 0.0) | 0.1<br>(0.0; 0.1)   | 0.0<br>(0.0; 0.0) | 0.0<br>(0.0; 0.0) | 0.1<br>(0.0; 0.1) | 0.1<br>(0.1; 0.1) |
|                                  | Reactive-Business/Sustained-School Closures | 0.0<br>(0.0; 0.0)  | 0.0<br>(0.0; 0.2) | 0.1<br>(0.0; 0.6)  | 0.0<br>(0.0; 0.2) | 0.0<br>(0.0; 0.4) | 0.2<br>(0.1; 1.0)   | 0.1<br>(0.0; 0.6) | 0.0<br>(0.0; 0.0) | 0.2<br>(0.1; 0.5) | 0.1<br>(0.1; 0.3) |
| Influenza-1918-X                 | Reactive-Business/Reactive-School Closures  | 0.1<br>(0.0; 0.7)  | 0.0<br>(0.0; 0.3) | 0.3<br>(0.0; 1.3)  | 0.0<br>(0.0; 0.1) | 0.1<br>(0.0; 0.6) | 0.3<br>(0.1; 0.8)   | 0.2<br>(0.0; 1.4) | 0.0<br>(0.0; 0.3) | 0.2<br>(0.1; 1.4) | 0.2<br>(0.1; 1.3) |
|                                  | Elimination                                 | 1.2<br>(0.6; 2.3)  | 0.4<br>(0.1; 1.2) | 6.7<br>(4.6; 9.4)  | 0.6<br>(0.3; 1.1) | 3.8<br>(2.2; 5.3) | 10.1<br>(6.9; 13.7) | 3.5<br>(2.5; 4.9) | 0.6<br>(0.4; 0.9) | 3.0<br>(2.0; 4.4) | 3.5<br>(2.5; 5.2) |
|                                  | No Closures                                 | 0.3<br>(0.1; 1.0)  | 0.2<br>(0.1; 0.7) | 1.1<br>(0.5; 2.9)  | 0.3<br>(0.1; 0.8) | 0.4<br>(0.2; 0.9) | 1.6<br>(0.7; 4.4)   | 0.7<br>(0.3; 1.9) | 0.2<br>(0.1; 0.7) | 1.6<br>(0.7; 4.5) | 2.0<br>(0.9; 5.4) |
| Influenza-1918-X                 | Reactive-Business/Sustained-School Closures | 0.2<br>(0.1; 0.4)  | 0.3<br>(0.1; 1.4) | 1.4<br>(0.8; 2.2)  | 0.4<br>(0.2; 0.8) | 0.6<br>(0.4; 0.9) | 1.9<br>(1.2; 3.0)   | 1.2<br>(0.7; 2.2) | 0.1<br>(0.1; 0.2) | 1.5<br>(0.9; 2.4) | 1.4<br>(0.8; 2.3) |
|                                  | Reactive-Business/Reactive-School Closures  | 1.0<br>(0.5; 2.0)  | 0.4<br>(0.1; 1.2) | 2.4<br>(1.5; 3.9)  | 0.2<br>(0.1; 0.5) | 1.2<br>(0.7; 1.9) | 2.4<br>(1.3; 4.4)   | 2.1<br>(1.4; 3.1) | 0.5<br>(0.3; 0.8) | 2.5<br>(1.7; 3.7) | 2.7<br>(1.8; 3.9) |
|                                  | Elimination                                 | 1.6<br>(0.8; 3.2)  | 0.7<br>(0.2; 1.8) | 8.1<br>(5.8; 11.2) | 0.9<br>(0.5; 1.6) | 4.4<br>(2.8; 6.0) | 12.3<br>(8.7; 16.4) | 4.3<br>(3.2; 6.1) | 0.9<br>(0.6; 1.3) | 4.7<br>(3.2; 6.9) | 5.6<br>(3.8; 7.9) |

continued on next page

| Income Group / Disease                     | Closure Strategy                            | AFF               | MIN               | MAN                | UTL               | CON                 | RTH                 | TRA               | ICT               | PFT               | PAO                |
|--------------------------------------------|---------------------------------------------|-------------------|-------------------|--------------------|-------------------|---------------------|---------------------|-------------------|-------------------|-------------------|--------------------|
| Covid-Omicron-X                            | No Closures                                 | 0.1<br>(0.1; 0.3) | 0.1<br>(0.0; 0.2) | 0.3<br>(0.2; 0.7)  | 0.1<br>(0.0; 0.2) | 0.1<br>(0.1; 0.2)   | 0.4<br>(0.2; 0.8)   | 0.2<br>(0.1; 0.4) | 0.1<br>(0.0; 0.2) | 0.4<br>(0.3; 0.9) | 0.4<br>(0.2; 0.8)  |
|                                            | Reactive-Business/Sustained-School Closures | 0.1<br>(0.0; 0.2) | 0.1<br>(0.0; 0.6) | 0.7<br>(0.3; 1.3)  | 0.2<br>(0.1; 0.4) | 0.3<br>(0.1; 0.6)   | 0.9<br>(0.4; 1.6)   | 0.6<br>(0.2; 1.1) | 0.1<br>(0.0; 0.1) | 0.7<br>(0.4; 1.3) | 0.6<br>(0.3; 1.0)  |
|                                            | Reactive-Business/Reactive-School Closures  | 0.4<br>(0.1; 1.0) | 0.2<br>(0.1; 0.5) | 1.3<br>(0.5; 2.2)  | 0.1<br>(0.1; 0.3) | 0.6<br>(0.2; 1.1)   | 1.3<br>(0.6; 2.3)   | 0.9<br>(0.3; 1.7) | 0.9<br>(0.3; 1.7) | 0.2<br>(0.1; 0.4) | 1.2<br>(0.5; 2.2)  |
|                                            | Elimination                                 | 0.9<br>(0.4; 2.0) | 0.4<br>(0.1; 1.1) | 5.5<br>(2.5; 8.6)  | 0.5<br>(0.3; 1.0) | 2.8<br>(1.1; 4.9)   | 8.0<br>(3.1; 12.7)  | 3.0<br>(1.5; 4.6) | 3.0<br>(1.5; 4.6) | 0.5<br>(0.3; 0.9) | 2.8<br>(1.7; 4.2)  |
|                                            | No Closures                                 | 1.2<br>(0.5; 3.1) | 0.7<br>(0.2; 2.3) | 4.2<br>(1.5; 7.7)  | 1.0<br>(0.4; 2.3) | 1.4<br>(0.5; 2.8)   | 5.1<br>(2.0; 9.1)   | 2.3<br>(0.9; 3.9) | 2.3<br>(0.9; 3.9) | 0.9<br>(0.3; 1.8) | 5.9<br>(2.2; 10.6) |
|                                            | Reactive-Business/Sustained-School Closures | 1.0<br>(0.4; 2.6) | 1.0<br>(0.3; 3.2) | 4.2<br>(2.1; 7.4)  | 1.1<br>(0.5; 2.2) | 1.4<br>(0.8; 2.7)   | 5.3<br>(3.0; 8.8)   | 3.1<br>(2.0; 4.9) | 3.1<br>(2.0; 4.9) | 0.7<br>(0.2; 1.5) | 5.1<br>(2.4; 9.5)  |
|                                            | Reactive-Business/Reactive-School Closures  | 1.8<br>(0.9; 3.7) | 0.9<br>(0.3; 2.6) | 6.5<br>(4.1; 9.6)  | 1.0<br>(0.5; 2.1) | 2.9<br>(1.7; 4.5)   | 8.4<br>(5.1; 12.2)  | 3.7<br>(2.5; 5.5) | 3.7<br>(2.5; 5.5) | 1.0<br>(0.6; 1.8) | 5.9<br>(3.5; 9.7)  |
|                                            | Elimination                                 | 2.3<br>(1.1; 4.4) | 1.1<br>(0.4; 3.1) | 9.3<br>(6.6; 13.0) | 1.4<br>(0.8; 2.7) | 4.6<br>(2.8; 6.5)   | 12.9<br>(9.0; 17.5) | 4.8<br>(3.5; 6.7) | 4.8<br>(3.5; 6.7) | 1.3<br>(0.8; 2.1) | 7.5<br>(4.9; 11.1) |
|                                            | No Closures                                 | 0.3<br>(0.1; 0.7) | 0.2<br>(0.0; 0.6) | 0.8<br>(0.3; 2.1)  | 0.2<br>(0.1; 0.6) | 0.3<br>(0.1; 0.7)   | 1.1<br>(0.5; 2.8)   | 0.5<br>(0.2; 1.2) | 0.5<br>(0.2; 1.2) | 0.2<br>(0.1; 0.5) | 1.2<br>(0.5; 3.0)  |
|                                            | Reactive-Business/Sustained-School Closures | 0.2<br>(0.1; 0.4) | 0.3<br>(0.1; 1.3) | 1.3<br>(0.7; 2.4)  | 0.4<br>(0.2; 0.8) | 0.6<br>(0.3; 0.9)   | 2.0<br>(1.2; 3.1)   | 1.4<br>(0.8; 2.4) | 1.4<br>(0.8; 2.4) | 0.1<br>(0.1; 0.2) | 1.3<br>(0.8; 2.4)  |
| Reactive-Business/Reactive-School Closures | 1.0<br>(0.4; 2.0)                           | 0.4<br>(0.1; 1.2) | 3.2<br>(1.9; 5.1) | 0.3<br>(0.2; 0.7)  | 1.6<br>(0.9; 2.6) | 4.0<br>(2.0; 6.6)   | 2.3<br>(1.5; 3.5)   | 2.3<br>(1.5; 3.5) | 0.5<br>(0.3; 0.8) | 2.6<br>(1.7; 3.9) |                    |
| Elimination                                | 0.6<br>(0.2; 2.3)                           | 0.5<br>(0.2; 1.3) | 6.0<br>(3.9; 8.8) | 0.7<br>(0.4; 1.3)  | 3.2<br>(1.9; 4.9) | 8.8<br>(5.6; 12.8)  | 3.4<br>(2.3; 4.9)   | 3.4<br>(2.3; 4.9) | 0.6<br>(0.4; 1.0) | 3.5<br>(2.3; 5.4) |                    |
| H1C                                        | No Closures                                 | 0.0<br>(0.0; 0.0) | 0.0<br>(0.0; 0.0) | 0.0<br>(0.0; 0.0)  | 0.0<br>(0.0; 0.0) | 0.0<br>(0.0; 0.0)   | 0.0<br>(0.0; 0.0)   | 0.0<br>(0.0; 0.0) | 0.0<br>(0.0; 0.0) | 0.0<br>(0.0; 0.1) | 0.0<br>(0.0; 0.1)  |
|                                            | Reactive-Business/Sustained-School Closures | 0.0<br>(0.0; 0.0) | 0.0<br>(0.0; 0.0) | 0.0<br>(0.0; 0.0)  | 0.0<br>(0.0; 0.0) | 0.0<br>(0.0; 0.0)   | 0.0<br>(0.0; 0.0)   | 0.0<br>(0.0; 0.0) | 0.0<br>(0.0; 0.0) | 0.0<br>(0.0; 0.0) | 0.0<br>(0.0; 0.1)  |
|                                            | Reactive-Business/Reactive-School Closures  | 0.0<br>(0.0; 0.0) | 0.0<br>(0.0; 0.0) | 0.0<br>(0.0; 0.0)  | 0.0<br>(0.0; 0.0) | 0.0<br>(0.0; 0.0)   | 0.0<br>(0.0; 0.0)   | 0.0<br>(0.0; 0.0) | 0.0<br>(0.0; 0.0) | 0.0<br>(0.0; 0.0) | 0.0<br>(0.0; 0.1)  |
|                                            | Elimination                                 | 0.3<br>(0.1; 0.6) | 0.0<br>(0.0; 0.1) | 4.7<br>(2.7; 7.1)  | 0.3<br>(0.2; 0.5) | 3.3<br>(1.9; 4.3)   | 8.1<br>(5.3; 10.8)  | 2.5<br>(1.6; 3.3) | 2.5<br>(1.6; 3.3) | 0.7<br>(0.4; 1.0) | 3.4<br>(2.1; 4.6)  |
|                                            | No Closures                                 | 0.0<br>(0.0; 0.0) | 0.0<br>(0.0; 0.0) | 0.0<br>(0.0; 0.1)  | 0.0<br>(0.0; 0.0) | 0.0<br>(0.0; 0.0)   | 0.0<br>(0.0; 0.1)   | 0.0<br>(0.0; 0.0) | 0.0<br>(0.0; 0.0) | 0.0<br>(0.0; 0.0) | 0.0<br>(0.1; 0.1)  |
|                                            | Reactive-Business/Sustained-School Closures | 0.0<br>(0.0; 0.0) | 0.0<br>(0.0; 0.0) | 0.1<br>(0.0; 0.4)  | 0.0<br>(0.0; 0.1) | 0.0<br>(0.0; 0.4)   | 0.1<br>(0.0; 0.8)   | 0.0<br>(0.0; 0.6) | 0.0<br>(0.0; 0.6) | 0.0<br>(0.0; 0.0) | 0.1<br>(0.1; 0.7)  |
|                                            | Reactive-Business/Reactive-School Closures  | 0.0<br>(0.0; 0.2) | 0.0<br>(0.0; 0.0) | 1.0<br>(0.6; 1.6)  | 0.0<br>(0.0; 0.0) | 0.0<br>(0.0; 0.6)   | 0.0<br>(0.0; 0.7)   | 0.0<br>(0.0; 1.1) | 0.0<br>(0.0; 1.1) | 0.0<br>(0.0; 0.4) | 0.1<br>(0.1; 1.9)  |
|                                            | Elimination                                 | 0.4<br>(0.2; 0.7) | 0.1<br>(0.0; 0.2) | 5.8<br>(4.0; 8.2)  | 0.4<br>(0.3; 0.6) | 3.9<br>(3.0; 4.8)   | 9.6<br>(7.5; 12.2)  | 2.9<br>(2.2; 3.7) | 2.9<br>(2.2; 3.7) | 0.9<br>(0.7; 1.1) | 4.0<br>(3.1; 5.2)  |
|                                            | No Closures                                 | 0.0<br>(0.0; 0.1) | 0.0<br>(0.0; 0.1) | 0.3<br>(0.2; 0.7)  | 0.1<br>(0.0; 0.2) | 0.1<br>(0.1; 0.3)   | 0.5<br>(0.3; 1.0)   | 0.2<br>(0.1; 0.4) | 0.2<br>(0.1; 0.4) | 0.1<br>(0.1; 0.3) | 0.8<br>(0.4; 1.6)  |
|                                            | Reactive-Business/Sustained-School Closures | 0.0<br>(0.0; 0.1) | 0.0<br>(0.0; 0.1) | 0.7<br>(0.3; 1.2)  | 0.2<br>(0.1; 0.3) | 0.5<br>(0.2; 0.6)   | 1.1<br>(0.7; 1.6)   | 0.7<br>(0.3; 1.1) | 0.7<br>(0.3; 1.1) | 0.1<br>(0.0; 0.1) | 1.2<br>(0.8; 1.7)  |
| Reactive-Business/Reactive-School Closures | 0.2<br>(0.1; 0.5)                           | 0.0<br>(0.0; 0.1) | 1.4<br>(0.6; 2.2) | 0.1<br>(0.1; 0.2)  | 0.8<br>(0.3; 1.2) | 1.2<br>(0.6; 2.0)   | 1.4<br>(0.4; 1.9)   | 1.4<br>(0.4; 1.9) | 0.6<br>(0.2; 0.8) | 2.7<br>(1.3; 3.6) |                    |
| Elimination                                | 0.4<br>(0.2; 0.7)                           | 0.1<br>(0.0; 0.2) | 6.2<br>(4.4; 8.7) | 0.5<br>(0.3; 0.7)  | 4.0<br>(3.2; 5.0) | 10.1<br>(8.0; 12.8) | 3.1<br>(2.4; 3.9)   | 3.1<br>(2.4; 3.9) | 1.0<br>(0.7; 1.2) | 4.6<br>(3.7; 5.9) |                    |
| Covid-Omicron-X                            | No Closures                                 | 0.0<br>(0.0; 0.1) | 0.0<br>(0.0; 0.0) | 0.3<br>(0.2; 0.7)  | 0.1<br>(0.0; 0.1) | 0.1<br>(0.1; 0.3)   | 0.4<br>(0.2; 0.8)   | 0.2<br>(0.1; 0.3) | 0.1<br>(0.1; 0.2) | 0.7<br>(0.4; 1.5) | 0.5<br>(0.3; 1.0)  |
|                                            | Reactive-Business/Sustained-School Closures | 0.0<br>(0.0; 0.1) | 0.0<br>(0.0; 0.1) | 0.8<br>(0.4; 1.4)  | 0.2<br>(0.1; 0.3) | 0.5<br>(0.2; 0.7)   | 1.2<br>(0.6; 1.7)   | 0.8<br>(0.4; 1.2) | 0.1<br>(0.1; 0.2) | 1.4<br>(0.8; 2.0) | 0.7<br>(0.4; 1.1)  |
|                                            | Reactive-Business/Reactive-School Closures  | 0.2<br>(0.1; 0.4) | 0.0<br>(0.0; 0.1) | 1.5<br>(0.7; 2.5)  | 0.1<br>(0.1; 0.2) | 0.9<br>(0.4; 1.3)   | 1.6<br>(0.9; 2.5)   | 1.2<br>(0.5; 1.9) | 1.2<br>(0.5; 1.9) | 0.5<br>(0.2; 0.8) | 2.5<br>(1.1; 3.6)  |
|                                            | Elimination                                 | 0.4<br>(0.2; 0.7) | 0.1<br>(0.0; 0.2) | 5.6<br>(3.6; 8.3)  | 0.4<br>(0.3; 0.7) | 3.8<br>(2.4; 4.9)   | 9.4<br>(6.5; 12.4)  | 3.0<br>(2.1; 3.9) | 3.0<br>(2.1; 3.9) | 0.9<br>(0.6; 1.2) | 4.4<br>(3.3; 5.7)  |
|                                            | No Closures                                 | 0.1<br>(0.1; 1.0) | 0.0<br>(0.0; 0.4) | 3.5<br>(1.1; 7.2)  | 0.7<br>(0.2; 1.5) | 1.5<br>(0.4; 3.1)   | 2.7<br>(1.5; 9.1)   | 1.9<br>(0.6; 3.6) | 1.9<br>(0.4; 2.6) | 1.3<br>(0.4; 2.6) | 8.1<br>(2.5; 16.2) |
|                                            | Reactive-Business/Sustained-School Closures | 0.2<br>(0.1; 0.7) | 0.1<br>(0.0; 0.5) | 3.3<br>(1.5; 6.3)  | 0.6<br>(0.3; 1.3) | 1.3<br>(0.8; 2.7)   | 4.6<br>(2.6; 8.3)   | 2.8<br>(1.8; 4.2) | 2.8<br>(1.8; 4.2) | 0.7<br>(0.3; 1.9) | 5.7<br>(2.8; 13.4) |
|                                            | Reactive-Business/Reactive-School Closures  | 0.6<br>(0.3; 1.1) | 0.1<br>(0.0; 0.4) | 5.4<br>(3.2; 8.4)  | 0.6<br>(0.3; 1.1) | 3.1<br>(1.9; 4.4)   | 7.9<br>(4.8; 11.2)  | 3.1<br>(2.1; 4.4) | 3.1<br>(2.1; 4.4) | 1.3<br>(0.9; 2.2) | 6.5<br>(4.6; 12.2) |
|                                            | Elimination                                 | 0.6<br>(0.4; 1.2) | 0.1<br>(0.0; 0.4) | 7.9<br>(5.6; 11.4) | 0.8<br>(0.5; 1.3) | 4.8<br>(3.8; 6.0)   | 12.3<br>(9.7; 15.6) | 4.0<br>(3.0; 5.3) | 4.0<br>(3.0; 5.3) | 1.5<br>(1.1; 2.3) | 8.3<br>(5.7; 12.6) |
|                                            | No Closures                                 | 0.1<br>(0.0; 0.2) | 0.0<br>(0.0; 0.1) | 0.4<br>(0.2; 1.2)  | 0.1<br>(0.0; 0.3) | 0.2<br>(0.1; 0.5)   | 0.6<br>(0.3; 1.7)   | 0.2<br>(0.1; 0.7) | 0.2<br>(0.1; 0.7) | 0.2<br>(0.1; 0.4) | 1.0<br>(0.6; 2.9)  |
|                                            | Reactive-Business/Sustained-School Closures | 0.0<br>(0.0; 0.1) | 0.0<br>(0.0; 0.2) | 1.0<br>(0.5; 1.7)  | 0.2<br>(0.1; 0.3) | 0.5<br>(0.3; 0.7)   | 1.6<br>(1.0; 2.3)   | 1.2<br>(0.7; 1.8) | 1.2<br>(0.7; 1.8) | 0.1<br>(0.1; 0.2) | 1.6<br>(1.1; 2.3)  |

continued on next page

continued from previous page

| Income Group // Disease | Closure Strategy                  | AFF               | MIN               | MAN               | UTL               | CON               | RTH                | TRA               | ICT               | PFT               | PAO               |
|-------------------------|-----------------------------------|-------------------|-------------------|-------------------|-------------------|-------------------|--------------------|-------------------|-------------------|-------------------|-------------------|
|                         | Reactive-Business/Reactive-School | 0.3<br>(0.1; 0.6) | 0.0<br>(0.0; 0.2) | 2.4<br>(1.3; 3.8) | 0.2<br>(0.1; 0.3) | 1.4<br>(0.8; 2.2) | 2.9<br>(1.5; 5.0)  | 1.7<br>(1.1; 2.4) | 0.7<br>(0.4; 0.9) | 3.2<br>(2.2; 4.2) | 2.9<br>(1.9; 4.0) |
|                         | Closures                          | 0.4<br>(0.2; 0.7) | 0.1<br>(0.0; 0.2) | 5.4<br>(3.6; 7.9) | 0.4<br>(0.3; 0.6) | 3.6<br>(2.5; 4.6) | 8.9<br>(6.5; 11.6) | 2.8<br>(2.1; 3.7) | 0.9<br>(0.6; 1.2) | 4.3<br>(3.2; 5.5) | 4.6<br>(3.3; 6.0) |
|                         | Elimination                       |                   |                   |                   |                   |                   |                    |                   |                   |                   |                   |

**Table S11:** Summary statistics (median, (IQR)) of projected GDP by aggregate economic sector (expressed as a percentage of annual GDP) under different closure strategies, for each disease and country-income group. AFF = Agriculture, Forestry, Fishing, MIN = Mining, MAN = Manufacturing, UTL = Utilities, CON = Construction, RTH = Retail, Hospitality, TRA = Transport, ICT = IT, Telecommunications, PFT = Finance, Professional, Technical, PAO = Public Administration, Other Services. Distributions are shown in Figure S16.

## 528 5 Code & Future Work

529 The code and data to reproduce this analysis are available on GitHub<sup>18</sup>. However, there is ongoing work to  
530 further develop the daedalus model as a pandemic planning tool:

- 531 • The daedalus R package<sup>110</sup> is currently under development as an open-source tool for pandemic projec-  
532 tions, with associated data and scenario comparison packages;
- 533 • DAEDALUS Explore<sup>111</sup> is an interactive dashboard tool, based on the daedalus R package, that acts as  
534 an accessible interface for decision-makers.

## 535 References

- 536 [1] Jackson C, Mangtani P, Hawker J, Olowokure B, Vynnycky E. The effects of school closures on influenza  
537 outbreaks and pandemics: systematic review of simulation studies. *PloS one* 2014; **9**: e97297.
- 538 [2] Lee VJ, Lye DC, Wilder-Smith A. Combination strategies for pandemic influenza response-a systematic  
539 review of mathematical modeling studies. *BMC medicine* 2009; **7**: 1-8.
- 540 [3] Longini Jr IM, Nizam A, Xu S, et al. Containing pandemic influenza at the source. *Science* 2005; **309**:  
541 1083-7.
- 542 [4] Bolton K, McCaw J, Moss R, et al. Likely effectiveness of pharmaceutical and non-pharmaceutical inter-  
543 ventions for mitigating influenza virus transmission in Mongolia. *Bulletin of the World Health Organization*  
544 2012; **90**: 264-71.
- 545 [5] Milne GJ, Baskaran P, Halder N, Karl S, Kelso J. Pandemic influenza in Papua New Guinea: a modelling  
546 study comparison with pandemic spread in a developed country. *BMJ open* 2013; **3**: e002518.
- 547 [6] Handel A, Miller JC, Ge Y, Fung ICH. If long-term suppression is not possible, how do we minimize  
548 mortality for COVID-19 and other emerging infectious disease outbreaks? *MedRxiv* 2020: 2020-03.
- 549 [7] Dobson A, Ricci C, Boucekkine R, et al. Balancing economic and epidemiological interventions in the  
550 early stages of pathogen emergence. *Science Advances* 2023; **9**: eade6169.
- 551 [8] Nowak SA, Nascimento de Lima P, Vardavas R. Optimal non-pharmaceutical pandemic response strategies  
552 depend critically on time horizons and costs. *Scientific Reports* 2023; **13**: 2416.
- 553 [9] Pisaneschi G, Tarani M, Di Donato G, Landi A, Laurino M, Manfredi P. Optimal social distancing  
554 in epidemic control: cost prioritization, adherence and insights into preparedness principles. *Scientific*  
555 *Reports* 2024; **14**: 4365.
- 556 [10] Doyle NJ, Cumming F, Thompson RN, Tildesley MJ. When should lockdown be implemented? Devising  
557 cost-effective strategies for managing epidemics amid vaccine uncertainty. *PLOS Computational Biology*  
558 2024; **20**: e1012010.
- 559 [11] Halder N, Kelso JK, Milne GJ. Cost-effective strategies for mitigating a future influenza pandemic with  
560 H1N1 2009 characteristics. *PLoS One* 2011; **6**: e22087.
- 561 [12] Kelso JK, Halder N, Postma MJ, Milne GJ. Economic analysis of pandemic influenza mitigation strategies  
562 for five pandemic severity categories. *BMC public health* 2013; **13**: 1-17.
- 563 [13] Kelso JK, Halder N, Milne GJ. Vaccination strategies for future influenza pandemics: a severity-based  
564 cost effectiveness analysis. *BMC infectious diseases* 2013; **13**: 1-13.
- 565 [14] Milne GJ, Halder N, Kelso JK. The cost effectiveness of pandemic influenza interventions: a pandemic  
566 severity based analysis. *PloS one* 2013; **8**: e61504.
- 567 [15] Haw DJ, Forchini G, Doohan P, et al. Optimizing social and economic activity while containing SARS-  
568 CoV-2 transmission using DAEDALUS. *Nature Computational Science* 2022; **2**: 223-33.
- 569 [16] Johnson R, Djaafara B, Haw D, et al. The societal value of SARS-CoV-2 booster vaccination in Indonesia.  
570 *Vaccine* 2023; **41**: 1885-91.
- 571 [17] Johnson R, Carnalla M, Basto-Abreu A, et al. Promoting healthy populations as a pandemic preparedness  
572 strategy: a simulation study from Mexico. *The Lancet Regional Health–Americas* 2024; **30**.
- 573 [18] Doohan P. daedalus\_mfp; 2025. Available from: [https://github.com/jameel-institute/daedalus\\_](https://github.com/jameel-institute/daedalus_mfp)  
574 [mfp](https://github.com/jameel-institute/daedalus_mfp).
- 575 [19] Walker PG, Whittaker C, Watson OJ, et al. The impact of COVID-19 and strategies for mitigation and  
576 suppression in low-and middle-income countries. *Science* 2020; **369**: 413-22.
- 577 [20] Hausmann R, Schetter U. Horrible trade-offs in a pandemic: Poverty, fiscal space, policy, and welfare.  
578 *World Development* 2022; **153**: 105819.
- 579 [21] Barnett-Howell Z, Watson OJ, Mobarak AM. The benefits and costs of social distancing in high-and  
580 low-income countries. *Transactions of the Royal Society of Tropical Medicine and Hygiene* 2021; **115**:  
581 807-19.

- 582 [22] The World Bank. The World by Income and Region; 2023. Available from: <https://datatopics.worldbank.org/world-development-indicators/the-world-by-income-and-region.html>.  
583
- 584 [23] The United Nations. World Population Prospects; 2019. Available from: <https://population.un.org/wpp/>.  
585
- 586 [24] The World Health Organization. Global Health Observatory; 2025. Available from: <https://apps.who.int/gho/data/node.home>.  
587
- 588 [25] The United Nations. International Standard Industrial Classification of All Economic Activities; 2008. Available from: [https://unstats.un.org/unsd/publication/seriesm/seriesm\\_4rev4e.pdf](https://unstats.un.org/unsd/publication/seriesm/seriesm_4rev4e.pdf).  
589
- 590 [26] The Organisation for Economic Co-operation and Development. Trade in Employment; 2021. Available from: <https://www.oecd.org/en/data/datasets/trade-in-employment.html>.  
591
- 592 [27] The International Labour Organization. Statistics on Employment; 2025. Available from: <https://ilostat.ilo.org/topics/employment/>.  
593
- 594 [28] The Organisation for Economic Co-operation and Development. Input-Output Tables; 2021. Available from: <https://www.oecd.org/en/data/datasets/input-output-tables.html>.  
595
- 596 [29] Béraud G, Kazmerczak S, Beutels P, et al. The French connection: the first large population-based contact survey in France relevant for the spread of infectious diseases. *PloS one* 2015; **10**: e0133203.  
597
- 598 [30] Prem K, Zandvoort Kv, Klepac P, et al. Projecting contact matrices in 177 geographical regions: an update and comparison with empirical data for the COVID-19 era. *PLoS computational biology* 2021; **17**: e1009098.  
599  
600
- 601 [31] Prem K, Cook AR, Jit M. Projecting social contact matrices in 152 countries using contact surveys and demographic data. *PLoS computational biology* 2017; **13**: e1005697.  
602
- 603 [32] Mossong J, Hens N, Jit M, et al. Social contacts and mixing patterns relevant to the spread of infectious diseases. *PLoS medicine* 2008; **5**: e74.  
604
- 605 [33] Mehand MS, Al-Shorbaji F, Millett P, Murgue B. The WHO R&D Blueprint: 2018 review of emerging infectious diseases requiring urgent research and development efforts. *Antiviral research* 2018; **159**: 63.  
606
- 607 [34] Fraser C, Donnelly CA, Cauchemez S, et al. Pandemic potential of a strain of influenza A (H1N1): early findings. *science* 2009; **324**: 1557-61.  
608
- 609 [35] Vynnycky E, Edmunds W. Analyses of the 1957 (Asian) influenza pandemic in the United Kingdom and the impact of school closures. *Epidemiology & Infection* 2008; **136**: 166-79.  
610
- 611 [36] Ferguson NM, Cummings DA, Cauchemez S, et al. Strategies for containing an emerging influenza pandemic in Southeast Asia. *Nature* 2005; **437**: 209-14.  
612
- 613 [37] Lyngse FP, Mortensen LH, Denwood MJ, et al. SARS-CoV-2 Omicron VOC transmission in Danish households. *MedRxiv* 2021: 2021-12.  
614
- 615 [38] Liu Y, Rocklöv J. The reproductive number of the Delta variant of SARS-CoV-2 is far higher compared to the ancestral SARS-CoV-2 virus. *Journal of travel medicine* 2021; **28**: taab124.  
616
- 617 [39] Billah MA, Miah MM, Khan MN. Reproductive number of coronavirus: A systematic review and meta-analysis based on global level evidence. *PloS one* 2020; **15**: e0242128.  
618
- 619 [40] Mills CE, Robins JM, Lipsitch M. Transmissibility of 1918 pandemic influenza. *Nature* 2004; **432**: 904-6.  
620
- 621 [41] Byambasuren O, Cardona M, Bell K, Clark J, McLaws ML, Glasziou P. Estimating the extent of asymptomatic COVID-19 and its potential for community transmission: systematic review and meta-analysis. *Official Journal of the Association of Medical Microbiology and Infectious Disease Canada* 2020; **5**: 223-34.  
622
- 623 [42] Balcan D, Hu H, Goncalves B, et al. Seasonal transmission potential and activity peaks of the new influenza A (H1N1): a Monte Carlo likelihood analysis based on human mobility. *BMC medicine* 2009; **7**: 1-12.  
624  
625
- 626 [43] Li B, Deng A, Li K, et al. Viral infection and transmission in a large, well-traced outbreak caused by the SARS-CoV-2 Delta variant. *Nature communications* 2022; **13**: 460.  
627

- 628 [44] Knock ES, Whittles LK, Lees JA, et al. The 2020 SARS-CoV-2 epidemic in England: key epidemiological  
629 drivers and impact of interventions. *MedRxiv* 2021: 2021-01.
- 630 [45] Cheng AC, Kotsimbos T, Reynolds A, et al. Clinical and epidemiological profile of patients with severe  
631 H1N1/09 pandemic influenza in Australia and New Zealand: an observational cohort study. *BMJ open*  
632 2011; **1**: e000100.
- 633 [46] Iuliano AD. Trends in disease severity and health care utilization during the early Omicron variant period  
634 compared with previous SARS-CoV-2 high transmission periods—United States, December 2020–January  
635 2022. *MMWR Morbidity and mortality weekly report* 2022; **71**.
- 636 [47] Guan Wj, Ni Zy, Hu Y, et al. Clinical characteristics of coronavirus disease 2019 in China. *New England*  
637 *journal of medicine* 2020; **382**: 1708-20.
- 638 [48] Carrat F, Vergu E, Ferguson NM, et al. Time lines of infection and disease in human influenza: a review  
639 of volunteer challenge studies. *American journal of epidemiology* 2008; **167**: 775-85.
- 640 [49] Ma Q, Liu J, Liu Q, et al. Global percentage of asymptomatic SARS-CoV-2 infections among the tested  
641 population and individuals with confirmed COVID-19 diagnosis: a systematic review and meta-analysis.  
642 *JAMA network open* 2021; **4**: e2137257-7.
- 643 [50] Reed C, Angulo FJ, Swerdlow DL, et al. Estimates of the prevalence of pandemic (H1N1) 2009, United  
644 States, April–July 2009. *Emerging infectious diseases* 2009; **15**: 2004.
- 645 [51] Napoli C, Fabiani M, Rizzo C, et al. Assessment of human influenza pandemic scenarios in Europe.  
646 *Eurosurveillance* 2015; **20**: 1-10.
- 647 [52] Nyberg T, Ferguson NM, Nash SG, et al. Comparative analysis of the risks of hospitalisation and death  
648 associated with SARS-CoV-2 omicron (B. 1.1. 529) and delta (B. 1.617. 2) variants in England: a cohort  
649 study. *The lancet* 2022; **399**: 1303-12.
- 650 [53] Sheikh A, McMenamin J, Taylor B, Robertson C. SARS-CoV-2 Delta VOC in Scotland: demographics,  
651 risk of hospital admission, and vaccine effectiveness. *The Lancet* 2021; **397**: 2461-2.
- 652 [54] Verity R, Okell LC, Dorigatti I, et al. Estimates of the severity of coronavirus disease 2019: a model-based  
653 analysis. *The Lancet infectious diseases* 2020; **20**: 669-77.
- 654 [55] Donaldson LJ, Rutter PD, Ellis BM, et al. Mortality from pandemic A/H1N1 2009 influenza in England:  
655 public health surveillance study. *Bmj* 2009; **339**.
- 656 [56] McDonald J. Asian influenza in Great Britain 1957-58. *Proceedings of the Royal Society of Medicine* 1958;  
657 **51**: 1016-8.
- 658 [57] Taubenberger JK, Morens DM. 1918 Influenza: the mother of all pandemics. *Revista Biomedica* 2006;  
659 **17**: 69-79.
- 660 [58] Diekmann O, Heesterbeek JAP, Metz JAJ. On the definition and the computation of the basic reproduction  
661 ratio  $R_0$  in models for infectious diseases in heterogeneous populations. *Journal of mathematical biology*  
662 1990; **28**: 365-82.
- 663 [59] Van den Driessche P, Watmough J. Reproduction numbers and sub-threshold endemic equilibria for  
664 compartmental models of disease transmission. *Mathematical biosciences* 2002; **180**: 29-48.
- 665 [60] Ritchie H. Google Mobility Trends: How has the pandemic changed the movement of people around the  
666 world? *Our World in Data* 2020. <https://ourworldindata.org/covid-mobility-trends>.
- 667 [61] Roser M. What is the COVID-19 Stringency Index? *Our World in Data* 2021.  
668 <https://ourworldindata.org/metrics-explained-covid19-stringency-index>.
- 669 [62] Zhang P, Wang T, Xie SX. Meta-analysis of several epidemic characteristics of COVID-19. *Journal of*  
670 *data science: JDS* 2020; **18**: 536.
- 671 [63] Mathieu E, Ritchie H, Rodés-Guirao L, et al. Coronavirus (COVID-19) Deaths. *Our World in Data* 2020.  
672 <https://ourworldindata.org/covid-deaths>.
- 673 [64] Wang H, Paulson KR, Pease SA, et al. Estimating excess mortality due to the COVID-19 pandemic: a  
674 systematic analysis of COVID-19-related mortality, 2020–21. *The Lancet* 2022; **399**: 1513-36.

- 675 [65] Delignette-Muller ML, Dutang C. fitdistrplus: An R package for fitting distributions. *Journal of statistical*  
676 *software* 2015; **64**: 1-34.
- 677 [66] Sun K, Wang W, Gao L, et al. Transmission heterogeneities, kinetics, and controllability of SARS-CoV-2.  
678 *Science* 2021; **371**: eabe2424.
- 679 [67] Ng Y. Evaluation of the effectiveness of surveillance and containment measures for the first 100 patients  
680 with COVID-19 in Singapore—January 2–February 29, 2020. *MMWR Morbidity and mortality weekly*  
681 *report* 2020; **69**.
- 682 [68] Whitty C, Atherton F, McBride M, et al. Technical report on the COVID-19 pandemic in the UK.  
683 *Department of Public Health and Social Care* 2022: 169-83.
- 684 [69] McAloon C, Collins Á, Hunt K, et al. Incubation period of COVID-19: a rapid systematic review and  
685 meta-analysis of observational research. *BMJ open* 2020; **10**: e039652.
- 686 [70] Auranen K, Shubin M, Erra E, et al. Efficacy and effectiveness of case isolation and quarantine during a  
687 growing phase of the COVID-19 epidemic in Finland. *Scientific reports* 2023; **13**: 298.
- 688 [71] Ali ST, Yeung A, Shan S, et al. Serial intervals and case isolation delays for coronavirus disease 2019: a  
689 systematic review and meta-analysis. *Clinical Infectious Diseases* 2022; **74**: 685-94.
- 690 [72] Fraser C, Riley S, Anderson RM, Ferguson NM. Factors that make an infectious disease outbreak con-  
691 trollable. *Proceedings of the National Academy of Sciences* 2004; **101**: 6146-51.
- 692 [73] Klinkenberg D, Fraser C, Heesterbeek H. The effectiveness of contact tracing in emerging epidemics. *PloS*  
693 *one* 2006; **1**: e12.
- 694 [74] Peak CM, Childs LM, Grad YH, Buckee CO. Comparing nonpharmaceutical interventions for containing  
695 emerging epidemics. *Proceedings of the National Academy of Sciences* 2017; **114**: 4023-8.
- 696 [75] Mathieu E, Ritchie H, Rodés-Guirao L, et al. Coronavirus (COVID-19) Testing. *Our World in Data* 2020.  
697 <https://ourworldindata.org/coronavirus-testing>.
- 698 [76] Russell TW, Golding N, Hellewell J, et al. Reconstructing the early global dynamics of under-ascertained  
699 COVID-19 cases and infections. *BMC medicine* 2020; **18**: 332.
- 700 [77] The World Bank. World Bank Open Data; 2021. Available from: [https://data.worldbank.org/  
701 indicator/SH.MED.BEDS.ZS](https://data.worldbank.org/indicator/SH.MED.BEDS.ZS).
- 702 [78] The World Health Organization. European Health Information Gateway;  
703 2024. Available from: [https://gateway.euro.who.int/en/indicators/hfa\\_  
704 542-6210-bed-occupancy-rate-acute-care-hospitals-only/](https://gateway.euro.who.int/en/indicators/hfa_542-6210-bed-occupancy-rate-acute-care-hospitals-only/).
- 705 [79] Bagust A, Place M, Posnett JW. Dynamics of bed use in accommodating emergency admissions: stochastic  
706 simulation model. *Bmj* 1999; **319**: 155-8.
- 707 [80] Bayati M, Noroozi R, Ghanbari-Jahromi M, Jalali FS. Inequality in the distribution of Covid-19 vaccine:  
708 a systematic review. *International journal for equity in health* 2022; **21**: 122.
- 709 [81] Mathieu E, Ritchie H, Rodés-Guirao L, et al. Coronavirus (COVID-19) Vaccinations. *Our World in Data*  
710 2020. <https://ourworldindata.org/covid-vaccinations>.
- 711 [82] Hogan AB, Winskill P, Watson OJ, et al. Within-country age-based prioritisation, global allocation, and  
712 public health impact of a vaccine against SARS-CoV-2: A mathematical modelling analysis. *Vaccine*  
713 2021; **39**: 2995-3006.
- 714 [83] Flaxman S, Mishra S, Gandy A, et al. Estimating the effects of non-pharmaceutical interventions on  
715 COVID-19 in Europe. *Nature* 2020; **584**: 257-61.
- 716 [84] Wu S, Neill R, De Foo C, et al. Aggressive containment, suppression, and mitigation of covid-19: lessons  
717 learnt from eight countries. *bmj* 2021; **375**.
- 718 [85] Kung S, Hills T, Kearns N, Beasley R. New Zealand’s COVID-19 elimination strategy and mortality  
719 patterns. *The Lancet* 2023; **402**: 1037-8.
- 720 [86] Dickens BL, Koo JR, Lim JT, et al. Modelling lockdown and exit strategies for COVID-19 in Singapore.  
721 *The Lancet Regional Health–Western Pacific* 2020; **1**.

- 722 [87] Forman R, Mossialos E. The EU response to COVID-19: from reactive policies to strategic Decision-  
723 Making. *Journal of Common Market Studies* 2021; **59**: 56.
- 724 [88] Keeling MJ, Hill EM, Gorsich EE, et al. Predictions of COVID-19 dynamics in the UK: Short-term  
725 forecasting and analysis of potential exit strategies. *PLoS computational biology* 2021; **17**: e1008619.
- 726 [89] Shimul SN, Hussain M, Faisal AJ, Hamid SA, Sultana N, Kuddus MA. Impact of alternative Non-  
727 Pharmaceutical Interventions strategies for controlling COVID-19 outbreak in Bangladesh: A modeling  
728 study. *Plos one* 2024; **19**: e0293863.
- 729 [90] Caldwell JM, de Lara-Tuprio E, Teng TR, et al. Understanding COVID-19 dynamics and the effects of  
730 interventions in the Philippines: A mathematical modelling study. *The Lancet Regional Health–Western  
731 Pacific* 2021; **14**.
- 732 [91] Perez-Guzman PN, Chanda SL, Schaap A, et al. Pandemic burden in low-income settings and impact  
733 of limited and delayed interventions: A granular modelling analysis of COVID-19 in Kabwe, Zambia.  
734 *International journal of infectious diseases* 2024; **147**: 107182.
- 735 [92] Lee K. Working from home as an economic and social change: A review. *Labour Economics* 2023; **85**:  
736 102462.
- 737 [93] Khawar L, Donovan B, Peeling RW, Guy RJ, McGregor S. Elimination and eradication goals for commu-  
738 nicable diseases: a systematic review. *Bulletin of the World Health Organization* 2023; **101**: 649.
- 739 [94] Badan Pusat Statistik [Central Bureau of Statistics]. PDB Menurut Lapangan Usaha Seri 2010 [GDP by  
740 Industry 2010 Series]; 2025. Available from: [https://www.bps.go.id/id/statistics-table/2/NjUjMg=  
741 =/-2010-version-gdp-at-2010-version.html](https://www.bps.go.id/id/statistics-table/2/NjUjMg==/-2010-version-gdp-at-2010-version.html).
- 742 [95] Office for National Statistics. Monthly gross domestic product by gross value added; 2025.  
743 Available from: [https://www.ons.gov.uk/economy/grossdomesticproductgdp/datasets/  
744 monthlygrossdomesticproductbygrossvalueadded](https://www.ons.gov.uk/economy/grossdomesticproductgdp/datasets/monthlygrossdomesticproductbygrossvalueadded).
- 745 [96] Australian Bureau of Statistics. Australian System of National Accounts; 2024.  
746 Available from: [https://www.abs.gov.au/statistics/economy/national-accounts/  
747 australian-system-national-accounts/latest-release](https://www.abs.gov.au/statistics/economy/national-accounts/australian-system-national-accounts/latest-release).
- 748 [97] Office for National Statistics. Business insights and impact on the UK economy; 2025. Avail-  
749 able from: [https://www.ons.gov.uk/economy/economicoutputandproductivity/output/datasets/  
750 businessinsightsandimpactontheukeconomy](https://www.ons.gov.uk/economy/economicoutputandproductivity/output/datasets/businessinsightsandimpactontheukeconomy).
- 751 [98] Gottlieb C, Grobovšek J, Poschke M, Saltiel F. Working from home in developing countries. *European  
752 Economic Review* 2021; **133**: 103679.
- 753 [99] Sittimart M, RattanaVIPapong W, Mirelman AJ, et al. An overview of the perspectives used in health  
754 economic evaluations. *Cost effectiveness and resource allocation* 2024; **22**: 41.
- 755 [100] The Global Fund . Results Report 2024; 2024. Available from: [https://www.theglobalfund.org/media/  
756 14794/core\\_2024-results\\_report\\_en.pdf](https://www.theglobalfund.org/media/14794/core_2024-results_report_en.pdf).
- 757 [101] Ananthapavan J, Moodie M, Milat AJ, Carter R. Systematic review to update ‘value of a statistical  
758 life’ estimates for Australia. *International journal of environmental research and public health* 2021; **18**:  
759 6168.
- 760 [102] Robinson LA, Sullivan R, Shogren JF. Do the benefits of COVID-19 policies exceed the costs? Exploring  
761 uncertainties in the age–VSL relationship. *Risk Analysis* 2021; **41**: 761-70.
- 762 [103] Masterman CJ, Viscusi WK. The income elasticity of global values of a statistical life: stated preference  
763 evidence. *Journal of Benefit-Cost Analysis* 2018; **9**: 407-34.
- 764 [104] U S Department of Transportation. Departmental Guidance on Valua-  
765 tion of a Statistical Life in Economic Analysis; 2025. Available from:  
766 [https://www.transportation.gov/office-policy/transportation-policy/  
767 revised-departmental-guidance-on-valuation-of-a-statistical-life-in-economic-analysis](https://www.transportation.gov/office-policy/transportation-policy/revised-departmental-guidance-on-valuation-of-a-statistical-life-in-economic-analysis).
- 768 [105] Yarrow N, Masood E, Afkar R. Estimates of COVID-19 impacts on learning and earning in Indonesia:  
769 How to turn the tide. World Bank, Washington, DC; 2020.

- 770 [106] National Economic and Development Authority. COVID-19 Pandemic to Cost PHP 41.4T for the Next  
771 40 Years. *Technical Report* 2021.
- 772 [107] Psacharopoulos G, Collis V, Patrinos HA, Vegas E. The COVID-19 cost of school closures in earnings  
773 and income across the world. *Comparative Education Review* 2021; **65**: 271-87.
- 774 [108] National Audit Office. Education Recovery in Schools in England. *Technical Report* 2023.
- 775 [109] de Bruijn AG, Meeter M. Catching up after COVID-19: do school programs for remediating pandemic-  
776 related learning loss work? In: *Frontiers in Education*. vol. 8 Frontiers Media SA; 2023. p. 1298171.
- 777 [110] Gupte P, Doohan P, Johnson R, et al.. daedalus: Model Health, Social, and Economic Costs of a Pan-  
778 demic;. Available from: <https://github.com/jameel-institute/daedalus>.
- 779 [111] Mears D, Gupte P, Russell E, et al.. DAEDALUS Explore; 2025. Available from: <https://daedalus.jameel-institute.org/>.  
780
